# Supplementary material for: HINGE: long-read assembly achieves optimal repeat resolution
Source: PubMed Central journal article supplement (PMC5411769; doi:10.1101/gr.216465.116), 2017-05
Supplement: supp_gr.216465.116_Supplemental_Table_S4.pdf [file supp_gr.216465.116_Supplemental_Table_S4.pdf]

# Performance of HINGE on NCTC 3000

In case of any questions or concerns please contact Govinda Kamath (gkamath@stanford.edu), Fei Xia (feixia@stanford.edu), and Ilan Shomorony (ilan.shomorony@berkeley.edu).

| ID      | Name                                                           | Coverage Depth | NCTC Pipeline       |                  |                       | HINGE                                                                                |                                             | Miniasm                                                                               |
|---------|----------------------------------------------------------------|----------------|---------------------|------------------|-----------------------|--------------------------------------------------------------------------------------|---------------------------------------------|---------------------------------------------------------------------------------------|
|         |                                                                |                | #Chromosome Contigs | #Plasmid Contigs | #Unidentified Contigs | Visualisation                                                                        | Classification                              |                                                                                       |
| NCTC74  | <i>Salmonella enterica subsp. enterica serovar Typhimurium</i> | 47             | 1                   | 1                | 0                     | 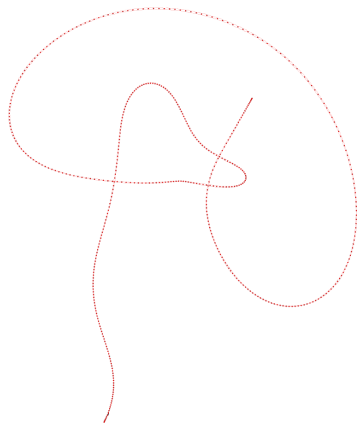   | Finished assembly (lacking circularisation) |    |
| NCTC86  | <i>Escherichia coli</i>                                        | 87             | 1                   | 0                | 0                     |   | Finished circular assembly                  |   |
| NCTC92  | <i>Salmonella enterica subsp. enterica</i>                     | 75             | 1                   | 0                | 1                     |  | Finished circular assembly                  |  |
| NCTC129 | <i>Salmonella enterica subsp. enterica</i>                     | 68             | 1                   | 0                | 0                     |  | Finished circular assembly                  |  |
| NCTC204 | <i>Klebsiella pneumoniae</i>                                   | 20             | 0                   | 0                | 4                     |  | Mis-assembly/Fragmented                     |  |
| NCTC235 | <i>Morganella morganii</i>                                     | 73             | 1                   | 0                | 0                     |                                                                                      | Finished circular assembly                  |                                                                                       |

|          |                               |     |         |         |         |                                                                                           |                                             |                                                                                              |
|----------|-------------------------------|-----|---------|---------|---------|-------------------------------------------------------------------------------------------|---------------------------------------------|----------------------------------------------------------------------------------------------|
|          |                               |     |         |         |         | 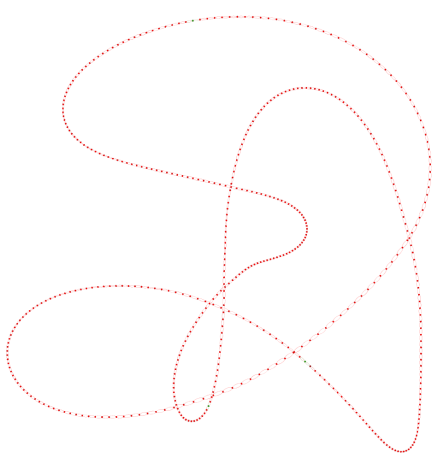         |                                             |            |
| NCTC418  | <i>Enterobacter aerogenes</i> | 56  | Pending | Pending | Pending | <br>o   | Finished circular assembly                  | <br>-     |
| NCTC1080 | <i>Streptococcus sp.</i>      | 170 | 1       | 0       | 1       |        | Finished circular assembly                  |          |
| NCTC1936 | <i>Klebsiella pneumoniae</i>  | 64  | 1       | 1       | 0       | <br>. | Finished circular assembly                  | <br>- . |
| NCTC2218 | <i>Streptococcus pyogenes</i> | 119 | 1       | 0       | 1       |       | Finished circular assembly                  |         |
| NCTC2366 | <i>Streptococcus pyogenes</i> | 150 | Pending | Pending | Pending |       | Finished assembly (lacking circularisation) | <br>-   |
| NCTC2669 | <i>Staphylococcus aureus</i>  | 162 | 1       | 1       | 0       |                                                                                           | Finished circular assembly                  |                                                                                              |

|          |                                |     |         |         |         |                                                                                      |                                            |                                                                                       |
|----------|--------------------------------|-----|---------|---------|---------|--------------------------------------------------------------------------------------|--------------------------------------------|---------------------------------------------------------------------------------------|
|          |                                |     |         |         |         | 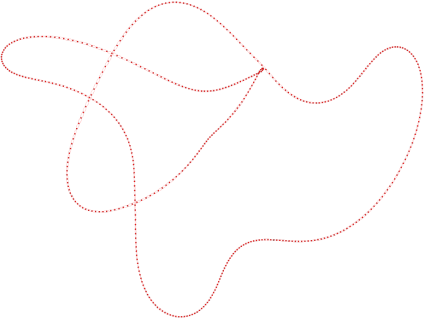   |                                            |     |
| NCTC3046 | <i>Salmonella sp.</i>          | 71  | 1       | 1       | 0       |    | Finished circular assembly                 |    |
| NCTC3166 | <i>Streptococcus viridans</i>  | 167 | Pending | Pending | Pending |  | Finished circular assembly                 |  |
| NCTC3168 | <i>Streptococcus sanguinis</i> | 189 | Pending | Pending | Pending |  | Finished circular assembly                 |  |
| NCTC3438 | <i>Avibacterium volantium</i>  | 136 | Pending | Pending | Pending |  | Finished circular assembly                 |  |
| NCTC3750 | <i>Staphylococcus aureus</i>   | 117 | 0       | 0       | 3       |  | Finished assembly with multiple traversals |  |
| NCTC3761 | <i>Staphylococcus aureus</i>   | 115 | 1       | 0       | 0       |                                                                                      | Finished circular assembly                 |                                                                                       |

|          |                                   |     |   |   |   |                                                                                       |                                            |                                                                                       |
|----------|-----------------------------------|-----|---|---|---|---------------------------------------------------------------------------------------|--------------------------------------------|---------------------------------------------------------------------------------------|
|          |                                   |     |   |   |   | 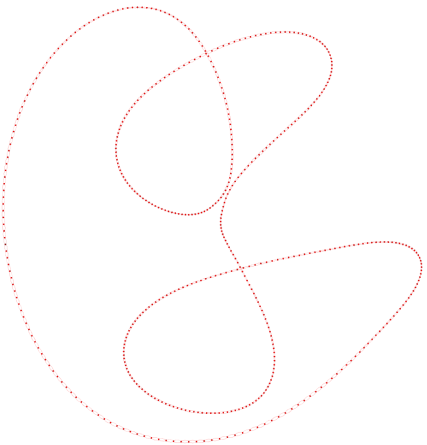     |                                            |     |
| NCTC4001 | <i>Streptococcus pyogenes</i>     | 108 | 1 | 0 | 0 |     | Finished circular assembly                 |    |
| NCTC4133 | <i>Staphylococcus epidermidis</i> | 159 | 1 | 0 | 0 |    | Finished circular assembly                 |   |
| NCTC4136 | <i>Staphylococcus aureus</i>      | 108 | 1 | 1 | 0 |  | Finished circular assembly                 |  |
| NCTC4137 | <i>Staphylococcus aureus</i>      | 102 | 1 | 0 | 0 |   | Finished circular assembly                 |  |
| NCTC4163 | <i>Staphylococcus aureus</i>      | 92  | 1 | 0 | 0 |   | Finished circular assembly                 |  |
| NCTC4168 | <i>Escherichia dispar</i>         | 43  | 1 | 0 | 5 |                                                                                       | Finished assembly with multiple traversals |                                                                                       |

|          |                                            |    |         |         |         |                                                                                      |                                             |                                                                                       |
|----------|--------------------------------------------|----|---------|---------|---------|--------------------------------------------------------------------------------------|---------------------------------------------|---------------------------------------------------------------------------------------|
|          |                                            |    |         |         |         | 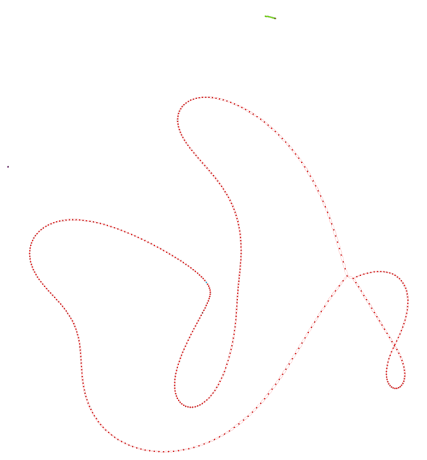    |                                             |     |
| NCTC4169 | <i>Escherichia coli</i>                    | 66 | 0       | 0       | 6       |    | Finished assembly (lacking circularisation) |    |
| NCTC4174 | <i>Escherichia coli</i>                    | 36 | Pending | Pending | Pending |   | Finished assembly (lacking circularisation) |   |
| NCTC4199 | <i>Proteus mirabilis</i>                   | 69 | 1       | 0       | 0       |  | Mis-assembly/Fragmented                     |  |
| NCTC4444 | <i>Salmonella enterica subsp. enterica</i> | 35 | 1       | 1       | 0       |  | Mis-assembly/Fragmented                     |  |
| NCTC4450 | <i>Escherichia coli</i>                    | 52 | 0       | 0       | 159     |  | Finished assembly with multiple traversals  |  |
| NCTC4669 | <i>Streptococcus dysgalactiae</i>          | 51 | Pending | Pending | Pending |                                                                                      | Finished circular assembly                  |                                                                                       |

|          |                                            |     |         |         |         |  |                            |  |
|----------|--------------------------------------------|-----|---------|---------|---------|--|----------------------------|--|
|          |                                            |     |         |         |         |  |                            |  |
| NCTC4671 | <i>Streptococcus dysgalactiae</i>          | 103 | 1       | 0       | 2       |  | Finished circular assembly |  |
| NCTC4672 | <i>Streptococcus uberis</i>                | 10  | 0       | 0       | 3       |  | Mis-assembly/Fragmented    |  |
| NCTC4673 | <i>Streptococcus uberis</i>                | 123 | 1       | 0       | 2       |  | Finished circular assembly |  |
| NCTC4675 | <i>Streptococcus sp</i>                    | 139 | 1       | 0       | 0       |  | Finished circular assembly |  |
| NCTC4725 | <i>Streptococcus sp.</i>                   | 61  | Pending | Pending | Pending |  | Finished circular assembly |  |
| NCTC4840 | <i>Salmonella enterica subsp. enterica</i> | 43  | 1       | 0       | 0       |  | Finished circular assembly |  |

|          |                                                      |    |   |   |   |                                                                                      |                                            |                                                                                       |
|----------|------------------------------------------------------|----|---|---|---|--------------------------------------------------------------------------------------|--------------------------------------------|---------------------------------------------------------------------------------------|
|          |                                                      |    |   |   |   | 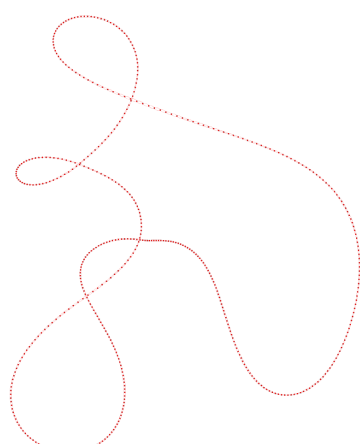    |                                            |     |
| NCTC5046 | <i>Klebsiella pneumoniae subsp. rhinoscleromatis</i> | 65 | 1 | 1 | 0 |    | Finished circular assembly                 |    |
| NCTC5047 | <i>Klebsiella pneumoniae</i>                         | 21 | 0 | 0 | 6 |  | Mis-assembly/Fragmented                    |  |
| NCTC5050 | <i>Klebsiella pneumoniae subsp. ozaenae</i>          | 54 | 2 | 3 | 0 |  | Mis-assembly/Fragmented                    |  |
| NCTC5051 | <i>Klebsiella pneumoniae</i>                         | 53 | 1 | 3 | 1 |  | Finished circular assembly                 |  |
| NCTC5052 | <i>Klebsiella pneumoniae</i>                         | 69 | 0 | 0 | 8 |  | Finished assembly with multiple traversals |  |
| NCTC5053 | <i>Klebsiella pneumoniae</i>                         | 28 | 0 | 0 | 7 |                                                                                      | Mis-assembly/Fragmented                    |                                                                                       |

|          |                               |     |   |   |   |  |                            |  |
|----------|-------------------------------|-----|---|---|---|--|----------------------------|--|
|          |                               |     |   |   |   |  |                            |  |
| NCTC5054 | <i>Klebsiella sp.</i>         | 67  | 1 | 3 | 1 |  | Finished circular assembly |  |
| NCTC5055 | <i>Klebsiella pneumoniae</i>  | 69  | 1 | 0 | 2 |  | Mis-assembly/Fragmented    |  |
| NCTC5056 | <i>Klebsiella pneumoniae</i>  | 62  | 1 | 3 | 2 |  | Finished circular assembly |  |
| NCTC5057 | <i>Klebsiella sp.</i>         | 68  | 0 | 0 | 2 |  | Finished circular assembly |  |
| NCTC5163 | <i>Streptococcus pyogenes</i> | 118 | 1 | 0 | 0 |  | Finished circular assembly |  |
| NCTC5164 | <i>Streptococcus pyogenes</i> | 199 | 1 | 0 | 0 |  | Finished circular assembly |  |



|          |                                                      |     |         |         |         |                                                                                      |                                                   |                                                                                       |
|----------|------------------------------------------------------|-----|---------|---------|---------|--------------------------------------------------------------------------------------|---------------------------------------------------|---------------------------------------------------------------------------------------|
|          |                                                      |     |         |         |         | 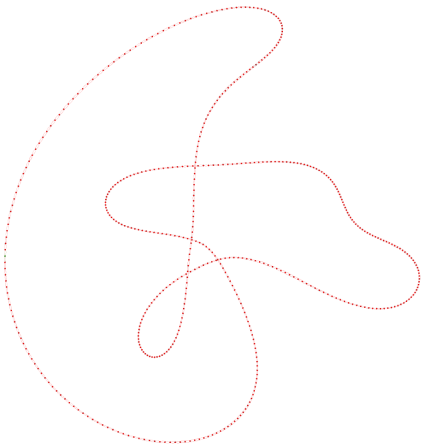    |                                                   |     |
| NCTC5338 | <i>Streptococcus sp.</i>                             | 204 | Pending | Pending | Pending |   | Finished assembly<br>(lacking<br>circularisation) |    |
| NCTC5370 | <i>Streptococcus dysgalactiae subsp. equisimilis</i> | 125 | 1       | 0       | 0       |  | Finished circular<br>assembly                     |   |
| NCTC5371 | <i>Streptococcus dysgalactiae subsp. equisimilis</i> | 140 | Pending | Pending | Pending |  | Finished circular<br>assembly                     |  |
| NCTC5385 | <i>Streptococcus sp.</i>                             | 156 | 1       | 0       | 0       |  | Finished circular<br>assembly                     |  |
| NCTC5386 | <i>Streptococcus sp.</i>                             | 129 | 1       | 0       | 2       |  | Finished circular<br>assembly                     |  |
| NCTC5655 | <i>Staphylococcus aureus</i>                         | 75  | 0       | 0       | 16      |                                                                                      | Finished circular<br>assembly                     |                                                                                       |

|          |                              |     |   |   |   |                                                                                      |                            |                                                                                       |
|----------|------------------------------|-----|---|---|---|--------------------------------------------------------------------------------------|----------------------------|---------------------------------------------------------------------------------------|
|          |                              |     |   |   |   | 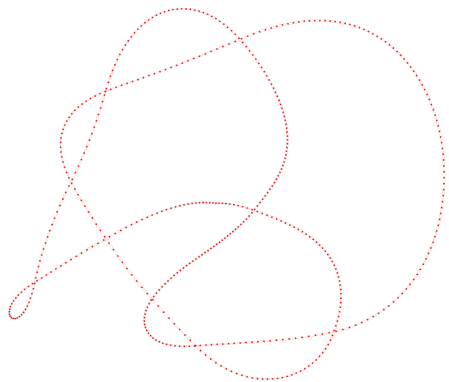   |                            |     |
| NCTC5656 | <i>Staphylococcus aureus</i> | 90  | 0 | 0 | 2 |    | Finished circular assembly |    |
| NCTC5657 | <i>Staphylococcus aureus</i> | 49  | 1 | 1 | 0 |  | Finished circular assembly |   |
| NCTC5658 | <i>Staphylococcus aureus</i> | 157 | 1 | 0 | 1 |  | Finished circular assembly |  |
| NCTC5660 | <i>Staphylococcus aureus</i> | 45  | 1 | 0 | 0 |  | Finished circular assembly |  |
| NCTC5661 | <i>Staphylococcus aureus</i> | 142 | 1 | 0 | 0 |  | Finished circular assembly |  |
| NCTC5663 | <i>Staphylococcus aureus</i> | 106 | 1 | 0 | 0 |                                                                                      | Finished circular assembly |                                                                                       |

|          |                                                         |    |   |   |   |                                                                                      |                            |                                                                                       |
|----------|---------------------------------------------------------|----|---|---|---|--------------------------------------------------------------------------------------|----------------------------|---------------------------------------------------------------------------------------|
|          |                                                         |    |   |   |   | 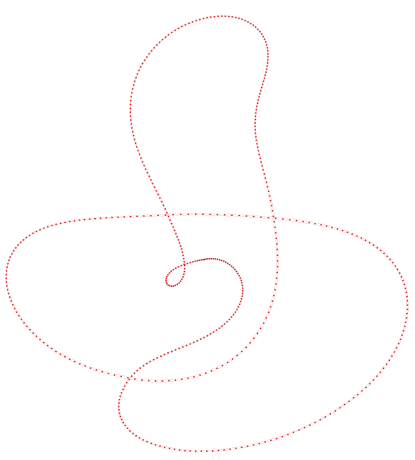    |                            |     |
| NCTC5664 | <i>Staphylococcus aureus</i>                            | 21 | 0 | 0 | 4 |    | Mis-assembly/Fragmented    |    |
| NCTC5706 | <i>Salmonella enterica subsp. enterica serovar Java</i> | 69 | 1 | 0 | 0 |   | Finished circular assembly |   |
| NCTC5713 | <i>Salmonella enterica subsp. enterica</i>              | 74 | 1 | 1 | 0 |  | Finished circular assembly |  |
| NCTC5717 | <i>Salmonella enterica</i>                              | 56 | 1 | 0 | 0 |  | Finished circular assembly |  |
| NCTC5722 | <i>Salmonella sp.</i>                                   | 59 | 1 | 0 | 0 |  | Finished circular assembly |  |
| NCTC5741 | <i>Salmonella enterica subsp. enterica</i>              | 84 | 0 | 0 | 1 |                                                                                      | Finished circular assembly |                                                                                       |

|          |                                                                |    |   |   |   |  |                                             |  |
|----------|----------------------------------------------------------------|----|---|---|---|--|---------------------------------------------|--|
|          |                                                                |    |   |   |   |  |                                             |  |
| NCTC5742 | <i>Salmonella enterica subsp. enterica</i>                     | 82 | 1 | 1 | 0 |  | Finished circular assembly                  |  |
| NCTC5743 | <i>Salmonella enterica subsp. enterica serovar Oranienburg</i> | 79 | 1 | 0 | 1 |  | Finished circular assembly                  |  |
| NCTC5750 | <i>Salmonella enterica subsp. enterica serovar Braenderup</i>  | 55 | 0 | 0 | 3 |  | Finished circular assembly                  |  |
| NCTC5773 | <i>Salmonella enterica subsp. salamae</i>                      | 29 | 1 | 0 | 0 |  | Finished assembly (lacking circularisation) |  |
| NCTC5793 | <i>Salmonella enterica</i>                                     | 91 | 1 | 1 | 1 |  | Finished circular assembly                  |  |
| NCTC5798 | <i>Salmonella enterica subsp. enterica</i>                     | 32 | 1 | 1 | 0 |  | Finished circular assembly                  |  |

|          |                                            |     |         |         |         |  |                            |  |
|----------|--------------------------------------------|-----|---------|---------|---------|--|----------------------------|--|
|          |                                            |     |         |         |         |  |                            |  |
| NCTC5934 | <i>Escherichia coli</i>                    | 51  | 1       | 0       | 0       |  | Finished circular assembly |  |
| NCTC5968 | <i>Streptococcus sp.</i>                   | 166 | 1       | 0       | 2       |  | Finished circular assembly |  |
| NCTC5969 | <i>Streptococcus sp.</i>                   | 141 | Pending | Pending | Pending |  | Finished circular assembly |  |
| NCTC6017 | <i>Salmonella enterica subsp. enterica</i> | 64  | 1       | 0       | 0       |  | Finished circular assembly |  |
| NCTC6024 | <i>Salmonella enterica subsp. enterica</i> | 75  | 1       | 0       | 0       |  | Finished circular assembly |  |
| NCTC6086 | <i>Salmonella enterica</i>                 | 48  | 0       | 0       | 1       |  | Finished circular assembly |  |

|          |                              |     |   |   |   |                                                                                      |                                             |                                                                                       |
|----------|------------------------------|-----|---|---|---|--------------------------------------------------------------------------------------|---------------------------------------------|---------------------------------------------------------------------------------------|
|          |                              |     |   |   |   | 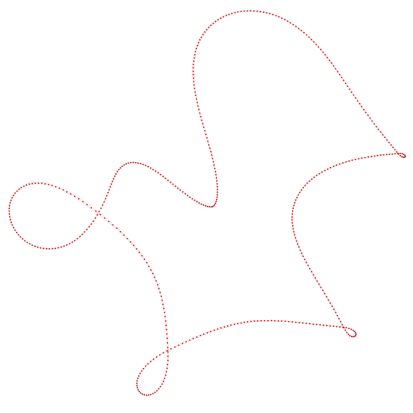   |                                             |     |
| NCTC6131 | <i>Staphylococcus aureus</i> | 43  | 1 | 0 | 0 |    | Finished circular assembly                  |    |
| NCTC6133 | <i>Staphylococcus aureus</i> | 25  | 1 | 1 | 0 |   | Finished assembly (lacking circularisation) |   |
| NCTC6134 | <i>Staphylococcus aureus</i> | 38  | 0 | 0 | 5 |  | Finished circular assembly                  |  |
| NCTC6135 | <i>Staphylococcus aureus</i> | 118 | 1 | 1 | 0 |  | Finished circular assembly                  |  |
| NCTC6136 | <i>Staphylococcus aureus</i> | 112 | 1 | 0 | 0 |  | Finished circular assembly                  |  |
| NCTC6137 | <i>Staphylococcus aureus</i> | 127 | 0 | 0 | 0 |                                                                                      | Finished circular assembly                  |                                                                                       |

|          |                                                      |     |         |         |         |                                                                                       |                            |                                                                                       |
|----------|------------------------------------------------------|-----|---------|---------|---------|---------------------------------------------------------------------------------------|----------------------------|---------------------------------------------------------------------------------------|
|          |                                                      |     |         |         |         | 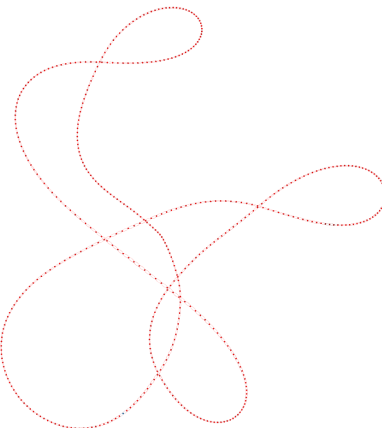     |                            |     |
| NCTC6179 | <i>Streptococcus dysgalactiae subsp. equisimilis</i> | 85  | Pending | Pending | Pending |     | Finished circular assembly |    |
| NCTC6198 | <i>Streptococcus sp.</i>                             | 102 | Pending | Pending | Pending |    | Finished circular assembly |   |
| NCTC6245 | <i>Salmonella enterica subsp. enterica</i>           | 30  | 1       | 1       | 0       |  | Finished circular assembly |  |
| NCTC6267 | <i>Citrobacter freundii</i>                          | 55  | 1       | 0       | 2       |   | Finished circular assembly |  |
| NCTC6385 | <i>Salmonella enterica</i>                           | 66  | 1       | 1       | 1       |   | Mis-assembly/Fragmented    |  |
| NCTC6403 | <i>Streptococcus sp.</i>                             | 41  | Pending | Pending | Pending |                                                                                       | Mis-assembly/Fragmented    |                                                                                       |

|          |                                                            |     |   |   |   |                                                                                      |                            |                                                                                       |
|----------|------------------------------------------------------------|-----|---|---|---|--------------------------------------------------------------------------------------|----------------------------|---------------------------------------------------------------------------------------|
|          |                                                            |     |   |   |   | 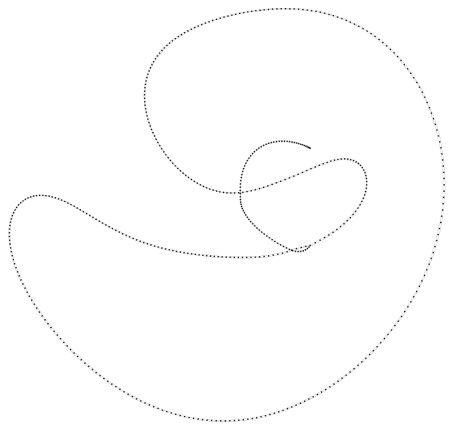    |                            |     |
| NCTC6407 | <i>Streptococcus sp.</i>                                   | 164 | 1 | 0 | 1 |    | Finished circular assembly |    |
| NCTC6482 | <i>Salmonella enterica subsp. enterica serovar Madelia</i> | 24  | 1 | 0 | 1 |   | Mis-assembly/Fragmented    |   |
| NCTC6507 | <i>Staphylococcus aureus</i>                               | 109 | 1 | 1 | 0 |  | Finished circular assembly |  |
| NCTC6513 | <i>Staphylococcus epidermidis</i>                          | 155 | 1 | 2 | 0 |  | Finished circular assembly |  |
| NCTC6571 | <i>Staphylococcus aureus</i>                               | 138 | 1 | 1 | 0 |  | Finished circular assembly |  |
| NCTC6754 | <i>Salmonella</i>                                          | 25  | 0 | 0 | 1 |                                                                                      | Finished circular assembly |                                                                                       |



|          |                                            |     |   |   |   |  |                            |  |
|----------|--------------------------------------------|-----|---|---|---|--|----------------------------|--|
|          |                                            |     |   |   |   |  |                            |  |
| NCTC6759 | <i>Salmonella enterica subsp. enterica</i> | 79  | 1 | 0 | 0 |  | Finished circular assembly |  |
| NCTC6802 | <i>Salmonella enterica</i>                 | 39  | 1 | 1 | 0 |  | Finished circular assembly |  |
| NCTC6933 | <i>Providencia rustigianii</i>             | 52  | 1 | 0 | 0 |  | Finished circular assembly |  |
| NCTC6947 | <i>Salmonella sp.</i>                      | 40  | 1 | 1 | 0 |  | Finished circular assembly |  |
| NCTC6966 | <i>Staphylococcus aureus</i>               | 83  | 1 | 1 | 0 |  | Finished circular assembly |  |
| NCTC7022 | <i>Streptococcus sp.</i>                   | 172 | 1 | 0 | 0 |  | Finished circular assembly |  |

|          |                                            |     |         |         |         |                                                                                      |                            |                                                                                       |
|----------|--------------------------------------------|-----|---------|---------|---------|--------------------------------------------------------------------------------------|----------------------------|---------------------------------------------------------------------------------------|
|          |                                            |     |         |         |         | 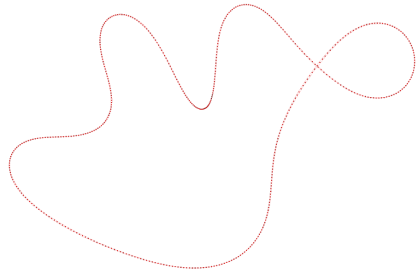   |                            |     |
| NCTC7023 | <i>Streptococcus sp</i>                    | 94  | 0       | 0       | 2       |    | Finished circular assembly |    |
| NCTC7102 | <i>Salmonella enterica subsp. enterica</i> | 29  | 1       | 0       | 0       |  | Finished circular assembly |   |
| NCTC7121 | <i>Staphylococcus aureus</i>               | 82  | 1       | 0       | 0       |  | Finished circular assembly |  |
| NCTC7151 | <i>Staphylococcus aureus</i>               | 115 | 0       | 0       | 5       |  | Finished circular assembly |  |
| NCTC7152 | <i>Escherichia coli</i>                    | 49  | 1       | 0       | 4       |  | Mis-assembly/Fragmented    |  |
| NCTC7164 | <i>Streptococcus sp.</i>                   | 109 | Pending | Pending | Pending |                                                                                      | Finished circular assembly |                                                                                       |

|          |                          |     |         |         |         |                                                                                      |                            |                                                                                       |
|----------|--------------------------|-----|---------|---------|---------|--------------------------------------------------------------------------------------|----------------------------|---------------------------------------------------------------------------------------|
|          |                          |     |         |         |         | 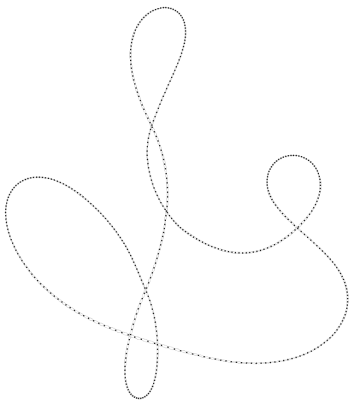  |                            |    |
| NCTC7169 | <i>Streptococcus sp.</i> | 98  | Pending | Pending | Pending |    | Finished circular assembly |    |
| NCTC7170 | <i>Streptococcus sp.</i> | 113 | Pending | Pending | Pending |   | Finished circular assembly |   |
| NCTC7173 | <i>Streptococcus sp.</i> | 146 | Pending | Pending | Pending |  | Finished circular assembly |  |
| NCTC7175 | <i>Streptococcus sp.</i> | 88  | Pending | Pending | Pending |  | Finished circular assembly |  |
| NCTC7179 | <i>Streptococcus sp.</i> | 6   | Pending | Pending | Pending |  | Mis-assembly/Fragmented    |  |
| NCTC7242 | <i>Klebsiella sp.</i>    | 49  | Pending | Pending | Pending |                                                                                      | Finished circular assembly |                                                                                       |

|          |                                            |     |   |   |   |                                                                                      |                                             |                                                                                       |
|----------|--------------------------------------------|-----|---|---|---|--------------------------------------------------------------------------------------|---------------------------------------------|---------------------------------------------------------------------------------------|
|          |                                            |     |   |   |   | 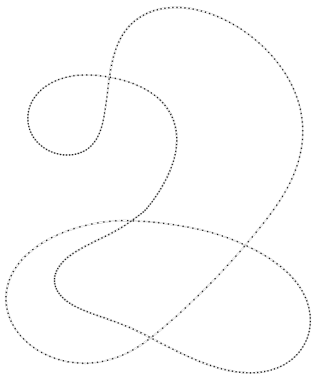    |                                             |     |
| NCTC7291 | <i>Staphylococcus warneri</i>              | 156 | 1 | 0 | 0 |    | Finished circular assembly                  |    |
| NCTC7292 | <i>Staphylococcus saprophyticus</i>        | 101 | 0 | 0 | 3 |  | Finished circular assembly                  |  |
| NCTC7295 | <i>Salmonella enterica subsp. arizonae</i> | 49  | 1 | 1 | 0 |  | Finished assembly (lacking circularisation) |  |
| NCTC7297 | <i>Salmonella sp.</i>                      | 27  | 1 | 0 | 0 |  | Mis-assembly/Fragmented                     |  |
| NCTC7299 | <i>Salmonella enterica subsp. arizonae</i> | 45  | 1 | 1 | 0 |  | Finished circular assembly                  |  |
| NCTC7300 | <i>Salmonella enterica subsp. arizonae</i> | 38  | 1 | 1 | 0 |                                                                                      | Finished circular assembly                  |                                                                                       |

|          |                                            |    |   |   |   |                                                                                      |                                             |                                                                                                                                                                                                                                                                                                                                                                 |
|----------|--------------------------------------------|----|---|---|---|--------------------------------------------------------------------------------------|---------------------------------------------|-----------------------------------------------------------------------------------------------------------------------------------------------------------------------------------------------------------------------------------------------------------------------------------------------------------------------------------------------------------------|
|          |                                            |    |   |   |   | 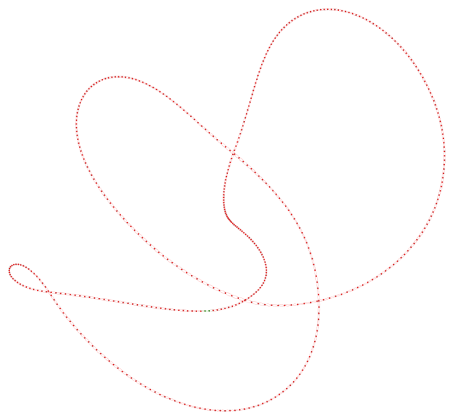    |                                             |                                                                                                                                                                                                                                                                               |
| NCTC7302 | <i>Salmonella enterica subsp. arizonae</i> | 54 | 1 | 0 | 0 |    | Finished circular assembly                  | <br>                                                                                                                                                                                      |
| NCTC7303 | <i>Salmonella enterica subsp. arizonae</i> | 43 | 1 | 1 | 0 |  | Finished circular assembly                  | <br><br><br> |
| NCTC7304 | <i>Salmonella enterica subsp. arizonae</i> | 34 | 1 | 0 | 1 |  | Finished assembly (lacking circularisation) | <br>                                                                                                                                                                                  |
| NCTC7306 | <i>Salmonella enterica subsp. arizonae</i> | 92 | 0 | 0 | 3 |  | Finished circular assembly                  |                                                                                                                                                                                                                                                                            |
| NCTC7307 | <i>Salmonella enterica subsp. arizonae</i> | 32 | 1 | 0 | 0 |  | Finished assembly (lacking circularisation) |                                                                                                                                                                                                                                                                            |
| NCTC7308 | <i>Salmonella enterica subsp. arizonae</i> | 91 | 1 | 2 | 0 |                                                                                      | Finished assembly with multiple traversals  |                                                                                                                                                                                                                                                                                                                                                                 |

|          |                                            |     |   |   |   |                                                                                       |                            |                                                                                       |
|----------|--------------------------------------------|-----|---|---|---|---------------------------------------------------------------------------------------|----------------------------|---------------------------------------------------------------------------------------|
|          |                                            |     |   |   |   | 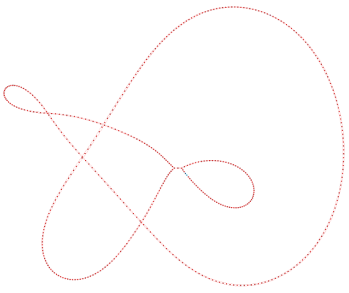     |                            |     |
| NCTC7318 | <i>Salmonella enterica subsp. houtenae</i> | 284 | 1 | 0 | 0 |     | Finished circular assembly |    |
| NCTC7323 | <i>Salmonella enterica subsp. arizonae</i> | 58  | 1 | 0 | 0 |    | Finished circular assembly |   |
| NCTC7349 | <i>Salmonella enterica subsp. arizonae</i> | 46  | 1 | 0 | 1 |   | Finished circular assembly |  |
| NCTC7360 | <i>Escherichia coli</i>                    | 45  | 1 | 1 | 0 |  | Mis-assembly/Fragmented    |  |
| NCTC7361 | <i>Staphylococcus aureus</i>               | 101 | 0 | 0 | 2 |   | Finished circular assembly |  |
| NCTC7362 | <i>Escherichia coli</i>                    | 70  | 0 | 0 | 4 |                                                                                       | Finished circular assembly |                                                                                       |

|          |                                            |     |         |         |         |                                                                                      |                                             |                                                                                       |
|----------|--------------------------------------------|-----|---------|---------|---------|--------------------------------------------------------------------------------------|---------------------------------------------|---------------------------------------------------------------------------------------|
|          |                                            |     |         |         |         | 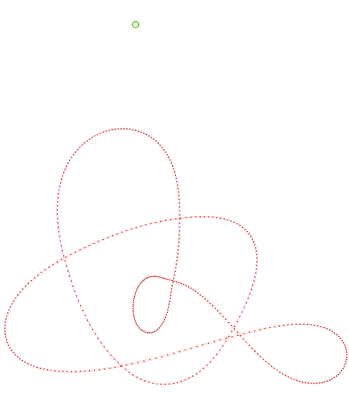  |                                             |     |
| NCTC7364 | <i>Acinetobacter calcoaceticus</i>         | 64  | 1       | 1       | 0       |    | Finished circular assembly                  |    |
| NCTC7366 | <i>Streptococcus salivarius</i>            | 110 | Pending | Pending | Pending |  | Finished assembly (lacking circularisation) |   |
| NCTC7377 | <i>Streptococcus sp.</i>                   | 93  | Pending | Pending | Pending |  | Finished circular assembly                  |  |
| NCTC7404 | <i>Salmonella enterica subsp. enterica</i> | 83  | 1       | 0       | 0       |  | Finished circular assembly                  |  |
| NCTC7406 | <i>Salmonella sp.</i>                      | 42  | 1       | 0       | 0       |  | Finished circular assembly                  |  |
| NCTC7411 | <i>Salmonella enterica subsp. enterica</i> | 55  | 1       | 0       | 0       |                                                                                      | Finished circular assembly                  |                                                                                       |

|          |                              |     |   |   |   |                                                                                      |                                             |                                                                                                                                                                                                                                                                         |
|----------|------------------------------|-----|---|---|---|--------------------------------------------------------------------------------------|---------------------------------------------|-------------------------------------------------------------------------------------------------------------------------------------------------------------------------------------------------------------------------------------------------------------------------|
|          |                              |     |   |   |   | 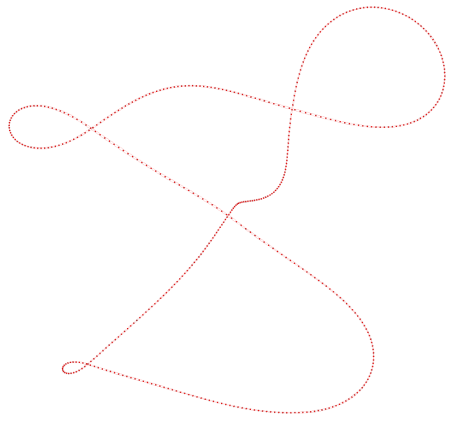    |                                             |                                                                                                                                                                                       |
| NCTC7414 | <i>Staphylococcus aureus</i> | 81  | 1 | 0 | 1 |    | Finished circular assembly                  | <br>                                                                                              |
| NCTC7415 | <i>Staphylococcus aureus</i> | 119 | 1 | 1 | 1 |  | Finished circular assembly                  | <br>                                                                                           |
| NCTC7427 | <i>Klebsiella pneumoniae</i> | 50  | 1 | 0 | 2 |  | Finished assembly (lacking circularisation) | <br><br> |
| NCTC7428 | <i>Staphylococcus aureus</i> | 69  | 1 | 0 | 1 |  | Finished circular assembly                  |                                                                                                                                                                                    |
| NCTC7445 | <i>Staphylococcus aureus</i> | 100 | 1 | 1 | 0 |  | Finished circular assembly                  | <br><br> |
| NCTC7446 | <i>Staphylococcus aureus</i> | 68  | 1 | 1 | 0 |                                                                                      | Finished circular assembly                  |                                                                                                                                                                                                                                                                         |



|          |                                                          |     |         |         |         |                                                                                       |                                             |                                                                                       |
|----------|----------------------------------------------------------|-----|---------|---------|---------|---------------------------------------------------------------------------------------|---------------------------------------------|---------------------------------------------------------------------------------------|
|          |                                                          |     |         |         |         | 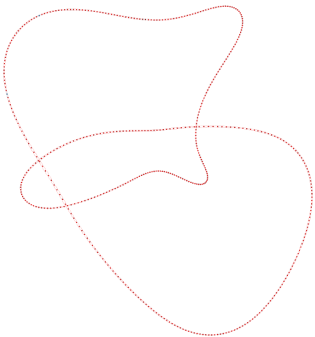    |                                             |     |
| NCTC7447 | <i>Staphylococcus aureus</i>                             | 42  | 1       | 0       | 1       |     | Finished assembly (lacking circularisation) |    |
| NCTC7465 | <i>Streptococcus pneumoniae</i>                          | 82  | 1       | 0       | 0       |    | Mis-assembly/Fragmented                     |   |
| NCTC7474 | <i>Staphylococcus epidermidis</i>                        | 161 | 1       | 1       | 1       |   | Finished circular assembly                  |  |
| NCTC7485 | <i>Staphylococcus aureus</i>                             | 169 | 1       | 0       | 0       |   | Finished circular assembly                  |  |
| NCTC7486 | <i>Staphylococcus sp.</i>                                | 103 | 1       | 2       | 0       |  | Finished circular assembly                  |  |
| NCTC7526 | <i>Staphylococcus saprophyticus subsp. saprophyticus</i> | 146 | Pending | Pending | Pending |                                                                                       | Finished circular assembly                  |                                                                                       |

|          |                                     |     |   |   |    |                                                                                       |                                            |                                                                                       |
|----------|-------------------------------------|-----|---|---|----|---------------------------------------------------------------------------------------|--------------------------------------------|---------------------------------------------------------------------------------------|
|          |                                     |     |   |   |    | 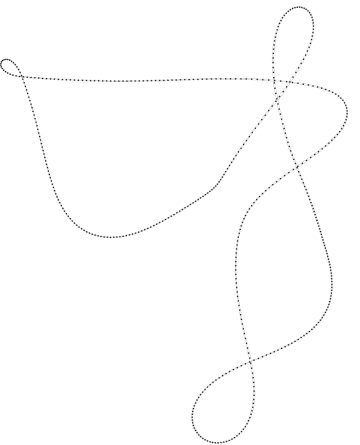     |                                            |     |
| NCTC7540 | <i>Staphylococcus saprophyticus</i> | 172 | 1 | 3 | 0  |    | Finished assembly with multiple traversals |    |
| NCTC7666 | <i>Staphylococcus saprophyticus</i> | 107 | 1 | 0 | 0  |    | Finished circular assembly                 |   |
| NCTC7687 | <i>Staphylococcus saprophyticus</i> | 115 | 0 | 0 | 14 |  | Finished circular assembly                 |  |
| NCTC7692 | <i>Staphylococcus saprophyticus</i> | 122 | 1 | 1 | 1  |   | Finished circular assembly                 |  |
| NCTC7712 | <i>Staphylococcus aureus</i>        | 124 | 1 | 0 | 1  |   | Finished circular assembly                 |  |
| NCTC7718 | <i>Staphylococcus sp.</i>           | 84  | 0 | 0 | 3  |                                                                                       | Finished circular assembly                 |                                                                                       |

|          |                                            |     |   |   |   |                                                                                      |                                             |                                                                                       |
|----------|--------------------------------------------|-----|---|---|---|--------------------------------------------------------------------------------------|---------------------------------------------|---------------------------------------------------------------------------------------|
|          |                                            |     |   |   |   | 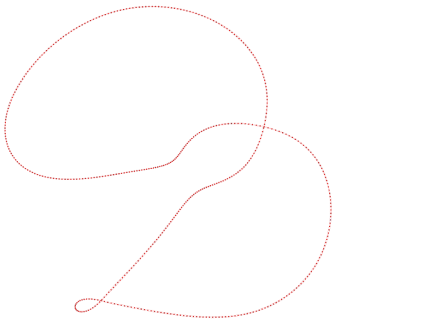   |                                             |     |
| NCTC7791 | <i>Staphylococcus aureus</i>               | 64  | 0 | 0 | 2 |    | Mis-assembly/Fragmented                     |    |
| NCTC7799 | <i>Klebsiella pneumoniae</i>               | 73  | 0 | 0 | 4 |  | Finished assembly with multiple traversals  |   |
| NCTC7802 | <i>Staphylococcus saprophyticus</i>        | 152 | 0 | 0 | 2 |  | Finished circular assembly                  |  |
| NCTC7831 | <i>Salmonella enterica subsp. enterica</i> | 38  | 0 | 0 | 1 |  | Finished assembly (lacking circularisation) |  |
| NCTC7832 | <i>Salmonella enterica subsp. enterica</i> | 37  | 1 | 0 | 2 |  | Finished circular assembly                  |  |
| NCTC7836 | <i>Salmonella enterica subsp. enterica</i> | 32  | 1 | 0 | 0 |                                                                                      | Finished circular assembly                  |                                                                                       |

|          |                               |     |         |         |         |                                                                                      |                            |                                                                                       |
|----------|-------------------------------|-----|---------|---------|---------|--------------------------------------------------------------------------------------|----------------------------|---------------------------------------------------------------------------------------|
|          |                               |     |         |         |         | 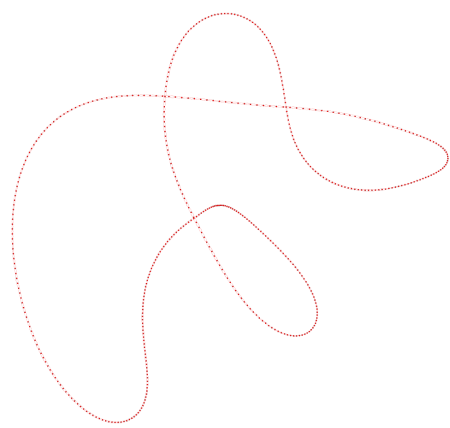    |                            |     |
| NCTC7856 | <i>Staphylococcus aureus</i>  | 66  | 1       | 1       | 0       |    | Finished circular assembly |    |
| NCTC7865 | <i>Streptococcus gordonii</i> | 137 | 1       | 0       | 0       |   | Finished circular assembly |   |
| NCTC7868 | <i>Streptococcus gordonii</i> | 172 | Pending | Pending | Pending |  | Finished circular assembly |  |
| NCTC7869 | <i>Streptococcus sp.</i>      | 22  | Pending | Pending | Pending |  | Mis-assembly/Fragmented    |  |
| NCTC7878 | <i>Staphylococcus aureus</i>  | 27  | Pending | Pending | Pending |  | Mis-assembly/Fragmented    |  |
| NCTC7887 | <i>Staphylococcus aureus</i>  | 45  | 1       | 0       | 1       |                                                                                      | Finished circular assembly |                                                                                       |

|          |                              |    |         |         |         |                                                                                      |                                             |                                                                                       |
|----------|------------------------------|----|---------|---------|---------|--------------------------------------------------------------------------------------|---------------------------------------------|---------------------------------------------------------------------------------------|
|          |                              |    |         |         |         | 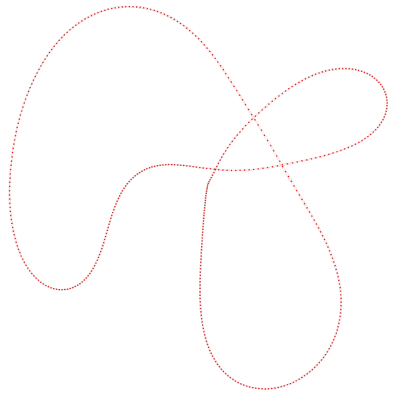   |                                             |     |
| NCTC7921 | <i>Escherichia coli</i>      | 43 | 0       | 0       | 7       |   | Finished circular assembly                  |    |
| NCTC7922 | <i>Escherichia coli</i>      | 26 | 0       | 0       | 6       |  | Mis-assembly/Fragmented                     |   |
| NCTC7926 | <i>Escherichia coli</i>      | 45 | 0       | 0       | 3       |  | Finished circular assembly                  |  |
| NCTC7927 | <i>Escherichia coli</i>      | 47 | 1       | 1       | 3       |  | Finished assembly (lacking circularisation) |  |
| NCTC7928 | <i>Escherichia coli</i>      | 30 | Pending | Pending | Pending |  | Mis-assembly/Fragmented                     |  |
| NCTC7944 | <i>Staphylococcus hyicus</i> | 82 | 1       | 0       | 0       |                                                                                      | Finished circular assembly                  |                                                                                       |

|          |                                   |     |         |         |         |                                                                                      |                                            |                                                                                       |
|----------|-----------------------------------|-----|---------|---------|---------|--------------------------------------------------------------------------------------|--------------------------------------------|---------------------------------------------------------------------------------------|
|          |                                   |     |         |         |         | 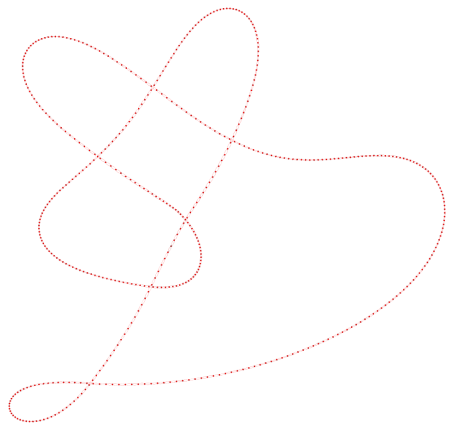    |                                            |     |
| NCTC7972 | <i>Staphylococcus aureus</i>      | 108 | 0       | 0       | 7       |    | Finished assembly with multiple traversals |    |
| NCTC7982 | <i>Streptococcus sp.</i>          | 70  | Pending | Pending | Pending |  | Finished circular assembly                 |   |
| NCTC7988 | <i>Staphylococcus aureus</i>      | 87  | Pending | Pending | Pending |  | Finished circular assembly                 |  |
| NCTC7990 | <i>Staphylococcus lugdunensis</i> | 166 | 1       | 0       | 0       |  | Finished circular assembly                 |  |
| NCTC8003 | <i>Escherichia coli</i>           | 49  | 0       | 0       | 4       |  | Finished circular assembly                 |  |
| NCTC8004 | <i>Staphylococcus aureus</i>      | 112 | 1       | 0       | 2       |                                                                                      | Finished circular assembly                 |                                                                                       |

|          |                                 |    |         |         |         |                                                                                      |                            |                                                                                       |
|----------|---------------------------------|----|---------|---------|---------|--------------------------------------------------------------------------------------|----------------------------|---------------------------------------------------------------------------------------|
|          |                                 |    |         |         |         | 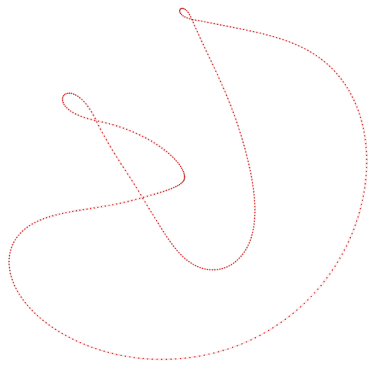   |                            |     |
| NCTC8007 | <i>Escherichia coli</i>         | 63 | 0       | 0       | 12      |   | Mis-assembly/Fragmented    |    |
| NCTC8008 | <i>Escherichia coli</i>         | 86 | 1       | 1       | 2       |  | Finished circular assembly |   |
| NCTC8009 | <i>Escherichia coli</i>         | 67 | 0       | 0       | 11      |  | Mis-assembly/Fragmented    |  |
| NCTC8017 | <i>Streptococcus agalactiae</i> | 93 | Pending | Pending | Pending |  | Possible mis-assembly      |  |
| NCTC8100 | <i>Streptococcus agalactiae</i> | 70 | Pending | Pending | Pending |  | Mis-assembly/Fragmented    |  |
| NCTC8105 | <i>Hafnia alvei</i>             | 53 | 1       | 1       | 0       |                                                                                      | Finished circular assembly |                                                                                       |

|          |                                |    |         |         |         |                                                                                      |                                             |                                                                                       |
|----------|--------------------------------|----|---------|---------|---------|--------------------------------------------------------------------------------------|---------------------------------------------|---------------------------------------------------------------------------------------|
|          |                                |    |         |         |         | 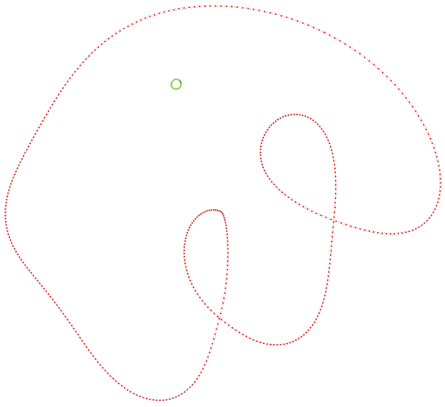   |                                             |     |
| NCTC8133 | <i>Streptococcus equinus</i>   | 33 | Pending | Pending | Pending |    | Mis-assembly/Fragmented                     |    |
| NCTC8140 | <i>Streptococcus equinus</i>   | 45 | Pending | Pending | Pending |  | Finished assembly (lacking circularisation) |  |
| NCTC8143 | <i>Haemophilus influenzae</i>  | 96 | 1       | 0       | 0       |  | Finished circular assembly                  |  |
| NCTC8159 | <i>Mycobacterium smegmatis</i> | 40 | 1       | 0       | 0       |  | Finished assembly (lacking circularisation) |  |
| NCTC8167 | <i>Klebsiella oxytoca</i>      | 42 | 0       | 0       | 3       |  | Finished circular assembly                  |  |
| NCTC8172 | <i>Klebsiella pneumoniae</i>   | 50 | 1       | 1       | 0       |                                                                                      | Finished circular assembly                  |                                                                                       |



|          |                                 |     |         |         |         |                                                                                       |                                             |                                                                                       |
|----------|---------------------------------|-----|---------|---------|---------|---------------------------------------------------------------------------------------|---------------------------------------------|---------------------------------------------------------------------------------------|
|          |                                 |     |         |         |         | 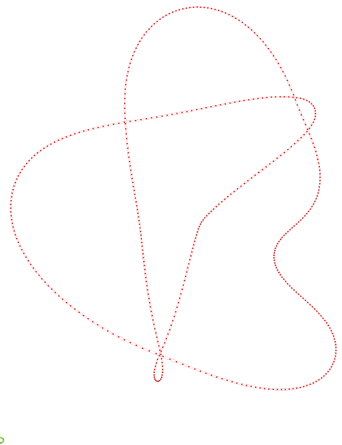     |                                             |     |
| NCTC8178 | <i>Staphylococcus aureus</i>    | 58  | 0       | 1       | 0       |     | Mis-assembly/Fragmented                     |    |
| NCTC8179 | <i>Escherichia coli</i>         | 36  | 1       | 1       | 3       |  | Mis-assembly/Fragmented                     |   |
| NCTC8184 | <i>Streptococcus agalactiae</i> | 91  | 0       | 0       | 1       |   | Finished assembly with multiple traversals  |  |
| NCTC8188 | <i>Streptococcus agalactiae</i> | 183 | 1       | 1       | 3       |   | Finished assembly (lacking circularisation) |  |
| NCTC8193 | <i>Streptococcus pyogenes</i>   | 101 | 0       | 0       | 1       |   | Finished circular assembly                  |  |
| NCTC8195 | <i>Streptococcus pyogenes</i>   | 151 | Pending | Pending | Pending |                                                                                       | Finished circular assembly                  |                                                                                       |

|          |                                            |     |         |         |         |  |                            |  |
|----------|--------------------------------------------|-----|---------|---------|---------|--|----------------------------|--|
|          |                                            |     |         |         |         |  |                            |  |
| NCTC8196 | <i>Escherichia coli</i>                    | 97  | 1       | 0       | 0       |  | Finished circular assembly |  |
| NCTC8198 | <i>Streptococcus pyogenes</i>              | 129 | 1       | 0       | 0       |  | Finished circular assembly |  |
| NCTC8230 | <i>Streptococcus pyogenes</i>              | 77  | Pending | Pending | Pending |  | Mis-assembly/Fragmented    |  |
| NCTC8231 | <i>Streptococcus pyogenes</i>              | 213 | 1       | 0       | 0       |  | Finished circular assembly |  |
| NCTC8232 | <i>Streptococcus pyogenes</i>              | 168 | Pending | Pending | Pending |  | Finished circular assembly |  |
| NCTC8256 | <i>Salmonella enterica subsp. enterica</i> | 61  | 1       | 0       | 1       |  | Finished circular assembly |  |

|          |                                            |    |   |   |   |                                                                                       |                                             |                                                                                       |
|----------|--------------------------------------------|----|---|---|---|---------------------------------------------------------------------------------------|---------------------------------------------|---------------------------------------------------------------------------------------|
|          |                                            |    |   |   |   | 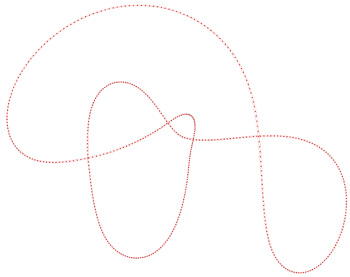    |                                             |     |
| NCTC8258 | <i>Salmonella enterica subsp. enterica</i> | 26 | 1 | 1 | 6 |     | Finished assembly (lacking circularisation) |    |
| NCTC8261 | <i>Salmonella enterica subsp. enterica</i> | 30 | 1 | 0 | 0 |  | Finished circular assembly                  |   |
| NCTC8267 | <i>Salmonella enterica subsp. enterica</i> | 59 | 1 | 0 | 0 |   | Finished circular assembly                  |  |
| NCTC8270 | <i>Salmonella enterica subsp. enterica</i> | 64 | 0 | 0 | 3 |  | Finished circular assembly                  |  |
| NCTC8271 | <i>Salmonella enterica subsp. enterica</i> | 64 | 1 | 0 | 0 |   | Finished circular assembly                  |  |
| NCTC8272 | <i>Salmonella enterica subsp. enterica</i> | 40 | 0 | 0 | 1 |                                                                                       | Finished circular assembly                  |                                                                                       |

|          |                                            |     |         |         |         |                                                                                       |                            |                                                                                       |
|----------|--------------------------------------------|-----|---------|---------|---------|---------------------------------------------------------------------------------------|----------------------------|---------------------------------------------------------------------------------------|
|          |                                            |     |         |         |         | 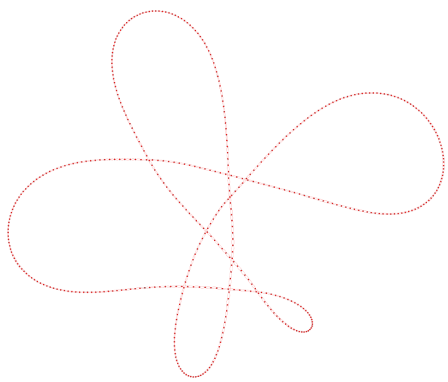    |                            |     |
| NCTC8273 | <i>Salmonella enterica subsp. salamae</i>  | 93  | 1       | 0       | 0       |     | Finished circular assembly |    |
| NCTC8294 | <i>Staphylococcus sp.</i>                  | 144 | 1       | 1       | 0       |   | Finished circular assembly |   |
| NCTC8297 | <i>Salmonella enterica subsp. arizonae</i> | 42  | 1       | 1       | 0       |  | Finished circular assembly |  |
| NCTC8300 | <i>Streptococcus pyogenes</i>              | 212 | 1       | 0       | 0       |   | Finished circular assembly |  |
| NCTC8303 | <i>Streptococcus pyogenes</i>              | 82  | Pending | Pending | Pending |   | Finished circular assembly |  |
| NCTC8314 | <i>Streptococcus pyogenes</i>              | 212 | 1       | 0       | 0       |                                                                                       | Finished circular assembly |                                                                                       |

|          |                               |     |         |         |         |                                                                                      |                                            |                                                                                       |
|----------|-------------------------------|-----|---------|---------|---------|--------------------------------------------------------------------------------------|--------------------------------------------|---------------------------------------------------------------------------------------|
|          |                               |     |         |         |         | 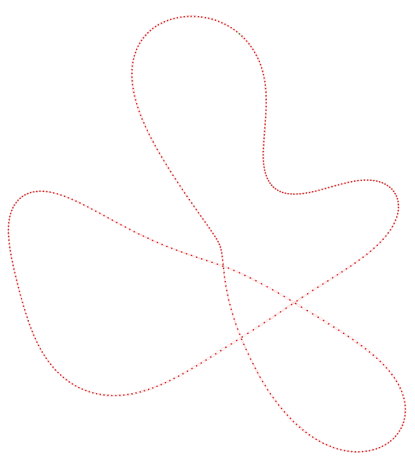    |                                            |     |
| NCTC8317 | <i>Staphylococcus aureus</i>  | 77  | 1       | 0       | 0       |    | Finished circular assembly                 |    |
| NCTC8324 | <i>Streptococcus pyogenes</i> | 142 | Pending | Pending | Pending |   | Finished circular assembly                 |   |
| NCTC8326 | <i>Streptococcus pyogenes</i> | 168 | Pending | Pending | Pending |  | Finished circular assembly                 |  |
| NCTC8328 | <i>Streptococcus pyogenes</i> | 208 | 1       | 0       | 0       |  | Finished circular assembly                 |  |
| NCTC8332 | <i>Streptococcus pyogenes</i> | 203 | 1       | 0       | 0       |  | Finished circular assembly                 |  |
| NCTC8333 | <i>Escherichia coli</i>       | 50  | 1       | 1       | 5       |                                                                                      | Finished assembly with multiple traversals |                                                                                       |

|          |                                    |     |   |   |   |                                                                                      |                                             |                                                                                       |
|----------|------------------------------------|-----|---|---|---|--------------------------------------------------------------------------------------|---------------------------------------------|---------------------------------------------------------------------------------------|
|          |                                    |     |   |   |   | 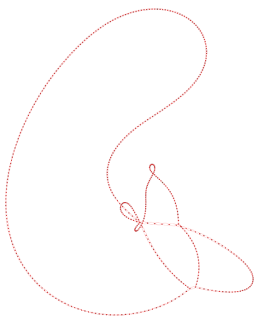  |                                             |     |
| NCTC8399 | <i>Staphylococcus aureus</i>       | 111 | 1 | 1 | 0 |    | Finished circular assembly                  |    |
| NCTC8450 | <i>Escherichia coli</i>            | 45  | 0 | 0 | 3 |  | Finished circular assembly                  |   |
| NCTC8455 | <i>Haemophilus influenzae</i>      | 130 | 1 | 0 | 0 |  | Finished circular assembly                  |  |
| NCTC8468 | <i>Haemophilus influenzae</i>      | 139 | 1 | 0 | 0 |  | Finished circular assembly                  |  |
| NCTC8480 | <i>Yersinia pseudotuberculosis</i> | 43  | 0 | 0 | 1 |  | Finished assembly (lacking circularisation) |  |
| NCTC8489 | <i>Pasteurella multocida</i>       | 109 | 1 | 0 | 1 |                                                                                      | Mis-assembly/Fragmented                     |                                                                                       |

|          |                                            |     |   |   |   |  |                            |  |
|----------|--------------------------------------------|-----|---|---|---|--|----------------------------|--|
|          |                                            |     |   |   |   |  |                            |  |
| NCTC8496 | <i>Salmonella enterica subsp. enterica</i> | 59  | 1 | 0 | 0 |  | Finished circular assembly |  |
| NCTC8500 | <i>Escherichia coli</i>                    | 29  | 1 | 1 | 0 |  | Mis-assembly/Fragmented    |  |
| NCTC8507 | <i>Staphylococcus aureus</i>               | 64  | 1 | 0 | 1 |  | Finished circular assembly |  |
| NCTC8530 | <i>Staphylococcus aureus</i>               | 122 | 1 | 1 | 0 |  | Finished circular assembly |  |
| NCTC8532 | <i>Staphylococcus aureus</i>               | 25  | 2 | 1 | 0 |  | Mis-assembly/Fragmented    |  |
| NCTC8546 | <i>Streptococcus sp</i>                    | 107 | 0 | 0 | 1 |  | Finished circular assembly |  |

|          |                                 |     |         |         |         |                                                                                      |                            |                                                                                       |
|----------|---------------------------------|-----|---------|---------|---------|--------------------------------------------------------------------------------------|----------------------------|---------------------------------------------------------------------------------------|
|          |                                 |     |         |         |         | 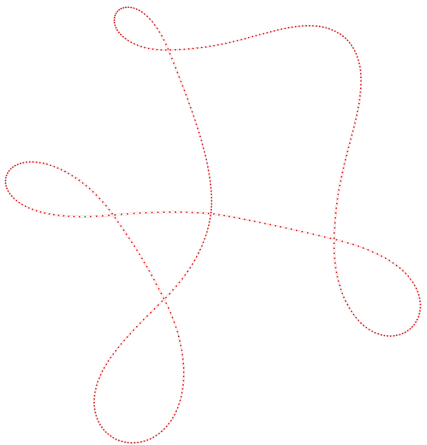    |                            |     |
| NCTC8547 | <i>Streptococcus sp.</i>        | 112 | Pending | Pending | Pending |    | Finished circular assembly |    |
| NCTC8603 | <i>Escherichia coli</i>         | 77  | 0       | 0       | 3       |  | Mis-assembly/Fragmented    |  |
| NCTC8618 | <i>Streptococcus salivarius</i> | 101 | Pending | Pending | Pending |  | Finished circular assembly |  |
| NCTC8620 | <i>Escherichia coli</i>         | 76  | 0       | 0       | 5       |  | Finished circular assembly |  |
| NCTC8621 | <i>Escherichia coli</i>         | 95  | 0       | 0       | 3       |  | Finished circular assembly |  |
| NCTC8622 | <i>Escherichia coli</i>         | 25  | 0       | 0       | 8       |                                                                                      | Mis-assembly/Fragmented    |                                                                                       |



|          |                                            |    |         |         |         |  |                            |  |
|----------|--------------------------------------------|----|---------|---------|---------|--|----------------------------|--|
|          |                                            |    |         |         |         |  |                            |  |
| NCTC8623 | <i>Escherichia coli</i>                    | 87 | 0       | 0       | 1       |  | Finished circular assembly |  |
| NCTC8684 | <i>Chromobacterium violaceum</i>           | 36 | 0       | 0       | 3       |  | Mis-assembly/Fragmented    |  |
| NCTC8705 | <i>Salmonella enterica subsp. enterica</i> | 48 | 1       | 0       | 1       |  | Finished circular assembly |  |
| NCTC8721 | <i>Bacillus licheniformis</i>              | 61 | 1       | 0       | 0       |  | Finished circular assembly |  |
| NCTC8723 | <i>Staphylococcus aureus</i>               | 76 | Pending | Pending | Pending |  | Finished circular assembly |  |
| NCTC8724 | <i>Staphylococcus aureus</i>               | 92 | 1       | 0       | 1       |  | Finished circular assembly |  |

|          |                              |     |         |         |         |                                                                                       |                            |                                                                                       |
|----------|------------------------------|-----|---------|---------|---------|---------------------------------------------------------------------------------------|----------------------------|---------------------------------------------------------------------------------------|
|          |                              |     |         |         |         | 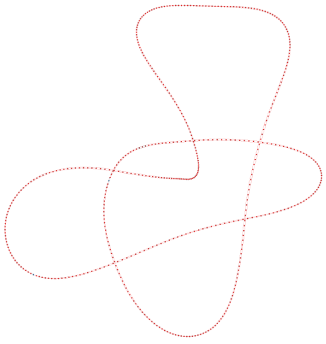    |                            |     |
| NCTC8725 | <i>Staphylococcus aureus</i> | 110 | 1       | 1       | 0       |     | Finished circular assembly |    |
| NCTC8726 | <i>Staphylococcus aureus</i> | 131 | 1       | 0       | 0       |    | Finished circular assembly |   |
| NCTC8727 | <i>Streptococcus sp.</i>     | 76  | Pending | Pending | Pending |   | Finished circular assembly |  |
| NCTC8729 | <i>Streptococcus sp.</i>     | 81  | Pending | Pending | Pending |  | Finished circular assembly |  |
| NCTC8731 | <i>Streptococcus sp.</i>     | 51  | Pending | Pending | Pending |   | Finished circular assembly |  |
| NCTC8732 | <i>Streptococcus sp.</i>     | 76  | Pending | Pending | Pending |                                                                                       | Finished circular assembly |                                                                                       |

|          |                          |     |         |         |         |                                                                                       |                            |                                                                                       |
|----------|--------------------------|-----|---------|---------|---------|---------------------------------------------------------------------------------------|----------------------------|---------------------------------------------------------------------------------------|
|          |                          |     |         |         |         | 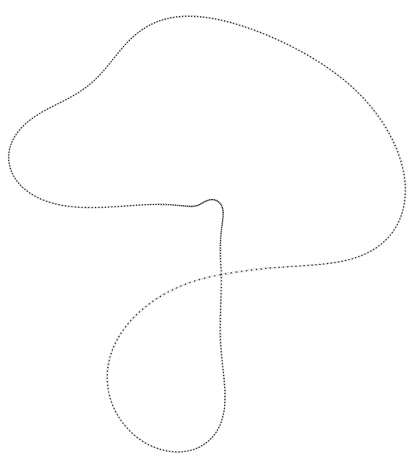     |                            |     |
| NCTC8734 | <i>Streptococcus sp.</i> | 75  | Pending | Pending | Pending |     | Finished circular assembly |    |
| NCTC8736 | <i>Streptococcus sp.</i> | 79  | Pending | Pending | Pending |   | Finished circular assembly |   |
| NCTC8738 | <i>Streptococcus sp.</i> | 125 | Pending | Pending | Pending |   | Finished circular assembly |  |
| NCTC8740 | <i>Streptococcus sp.</i> | 117 | Pending | Pending | Pending |   | Mis-assembly/Fragmented    |  |
| NCTC8741 | <i>Streptococcus sp.</i> | 52  | Pending | Pending | Pending |  | Finished circular assembly |  |
| NCTC8742 | <i>Streptococcus sp.</i> | 49  | Pending | Pending | Pending |                                                                                       | Mis-assembly/Fragmented    |                                                                                       |

|          |                              |     |         |         |         |  |                                            |  |
|----------|------------------------------|-----|---------|---------|---------|--|--------------------------------------------|--|
|          |                              |     |         |         |         |  |                                            |  |
| NCTC8743 | <i>Streptococcus sp.</i>     | 118 | Pending | Pending | Pending |  | Finished circular assembly                 |  |
| NCTC8746 | <i>Streptococcus sp.</i>     | 126 | Pending | Pending | Pending |  | Finished circular assembly                 |  |
| NCTC8749 | <i>Streptococcus</i>         | 112 | Pending | Pending | Pending |  | Finished circular assembly                 |  |
| NCTC8765 | <i>Staphylococcus aureus</i> | 128 | 1       | 0       | 1       |  | Finished circular assembly                 |  |
| NCTC8766 | <i>Staphylococcus aureus</i> | 134 | 1       | 1       | 0       |  | Finished circular assembly                 |  |
| NCTC8781 | <i>Escherichia coli</i>      | 37  | 0       | 0       | 3       |  | Finished assembly with multiple traversals |  |

|          |                               |     |         |         |         |                                                                                      |                                             |                                                                                       |
|----------|-------------------------------|-----|---------|---------|---------|--------------------------------------------------------------------------------------|---------------------------------------------|---------------------------------------------------------------------------------------|
|          |                               |     |         |         |         | 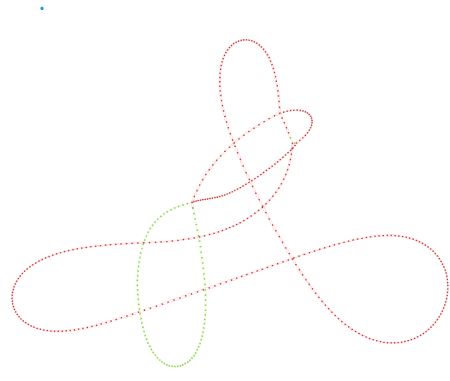   |                                             |     |
| NCTC8783 | <i>Escherichia coli</i>       | 65  | 0       | 0       | 4       |    | Mis-assembly/Fragmented                     |    |
| NCTC8796 | <i>Streptococcus sp.</i>      | 122 | Pending | Pending | Pending |   | Finished circular assembly                  |   |
| NCTC8839 | <i>Klebsiella sp.</i>         | 65  | 1       | 1       | 1       |  | Finished circular assembly                  |  |
| NCTC8846 | <i>Enterobacter aerogenes</i> | 29  | Pending | Pending | Pending |  | Finished assembly (lacking circularisation) |  |
| NCTC8849 | <i>Klebsiella pneumoniae</i>  | 27  | 0       | 0       | 5       |  | Mis-assembly/Fragmented                     |  |
| NCTC8883 | <i>Klebsiella pneumoniae</i>  | 46  | 0       | 0       | 7       |                                                                                      | Mis-assembly/Fragmented                     |                                                                                       |

|          |                              |    |   |   |   |  |                                            |  |
|----------|------------------------------|----|---|---|---|--|--------------------------------------------|--|
|          |                              |    |   |   |   |  |                                            |  |
| NCTC8895 | <i>Klebsiella pneumoniae</i> | 46 | 0 | 0 | 4 |  | Finished circular assembly                 |  |
| NCTC8900 | <i>Serratia plymuthica</i>   | 55 | 1 | 0 | 0 |  | Finished circular assembly                 |  |
| NCTC8960 | <i>Escherichia coli</i>      | 61 | 0 | 0 | 7 |  | Finished assembly with multiple traversals |  |
| NCTC8984 | <i>Escherichia coli</i>      | 41 | 1 | 1 | 2 |  | Finished circular assembly                 |  |
| NCTC8985 | <i>Escherichia coli</i>      | 24 | 0 | 0 | 3 |  | Mis-assembly/Fragmented                    |  |
| NCTC9001 | <i>Escherichia coli</i>      | 40 | 6 | 2 | 0 |  | Mis-assembly/Fragmented                    |  |

|          |                         |    |   |   |    |                                                                                      |                                            |                                                                                       |
|----------|-------------------------|----|---|---|----|--------------------------------------------------------------------------------------|--------------------------------------------|---------------------------------------------------------------------------------------|
|          |                         |    |   |   |    | 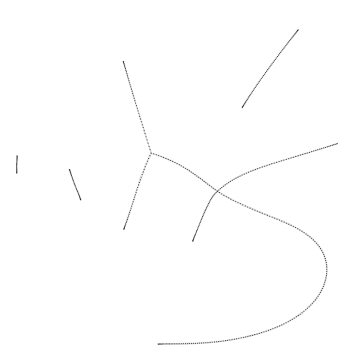   |                                            |     |
| NCTC9002 | <i>Escherichia coli</i> | 87 | 0 | 0 | 11 |    | Finished circular assembly                 |    |
| NCTC9003 | <i>Escherichia coli</i> | 76 | 1 | 1 | 0  |   | Finished circular assembly                 |   |
| NCTC9004 | <i>Escherichia coli</i> | 42 | 1 | 2 | 0  |  | Finished circular assembly                 |  |
| NCTC9005 | <i>Escherichia coli</i> | 85 | 1 | 0 | 1  |  | Finished circular assembly                 |  |
| NCTC9006 | <i>Escherichia coli</i> | 51 | 0 | 0 | 6  |  | Finished assembly with multiple traversals |  |
| NCTC9007 | <i>Escherichia coli</i> | 77 | 0 | 0 | 4  |                                                                                      | Finished assembly with multiple traversals |                                                                                       |

|          |                         |     |   |   |   |                                                                                       |                                            |                                                                                       |
|----------|-------------------------|-----|---|---|---|---------------------------------------------------------------------------------------|--------------------------------------------|---------------------------------------------------------------------------------------|
|          |                         |     |   |   |   | 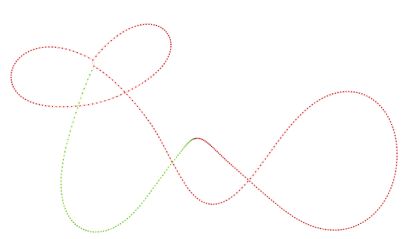    |                                            |     |
| NCTC9008 | <i>Escherichia coli</i> | 100 | 1 | 0 | 0 |     | Finished circular assembly                 |    |
| NCTC9009 | <i>Escherichia coli</i> | 77  | 1 | 0 | 1 |    | Finished assembly with multiple traversals |   |
| NCTC9010 | <i>Escherichia coli</i> | 90  | 0 | 0 | 5 |  | Finished assembly with multiple traversals |  |
| NCTC9011 | <i>Escherichia coli</i> | 72  | 0 | 0 | 5 |   | Finished circular assembly                 |  |
| NCTC9012 | <i>Escherichia coli</i> | 63  | 1 | 0 | 3 |  | Finished circular assembly                 |  |
| NCTC9014 | <i>Escherichia coli</i> | 47  | 1 | 0 | 1 |                                                                                       | Finished circular assembly                 |                                                                                       |



|          |                         |    |         |         |         |                                                                                       |                                             |                                                                                                                                                                                |
|----------|-------------------------|----|---------|---------|---------|---------------------------------------------------------------------------------------|---------------------------------------------|--------------------------------------------------------------------------------------------------------------------------------------------------------------------------------|
|          |                         |    |         |         |         | 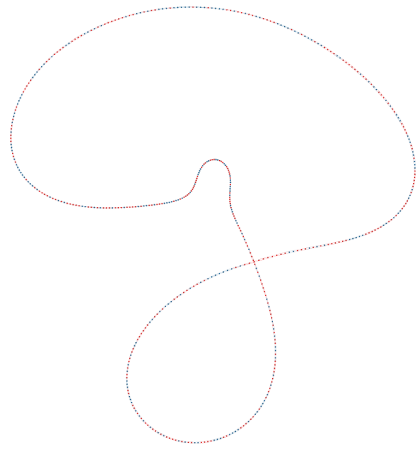     |                                             |                                                                                              |
| NCTC9015 | <i>Escherichia coli</i> | 73 | 1       | 2       | 1       |    | Finished circular assembly                  | <br>     |
| NCTC9016 | <i>Escherichia coli</i> | 46 | 0       | 0       | 118     |   | Finished assembly with multiple traversals  | <br>  |
| NCTC9019 | <i>Escherichia coli</i> | 78 | Pending | Pending | Pending |   | Finished circular assembly                  | <br> |
| NCTC9021 | <i>Escherichia coli</i> | 33 | 1       | 0       | 1       |  | Finished assembly (lacking circularisation) | <br> |
| NCTC9022 | <i>Escherichia coli</i> | 68 | 1       | 0       | 0       |   | Finished circular assembly                  |                                                                                           |
| NCTC9023 | <i>Escherichia coli</i> | 57 | 0       | 0       | 2       |                                                                                       | Finished circular assembly                  |                                                                                                                                                                                |

|          |                         |    |   |   |   |  |  |                                                                                       |                                                                                                                                   |
|----------|-------------------------|----|---|---|---|--|--|---------------------------------------------------------------------------------------|-----------------------------------------------------------------------------------------------------------------------------------|
|          |                         |    |   |   |   |  |  | 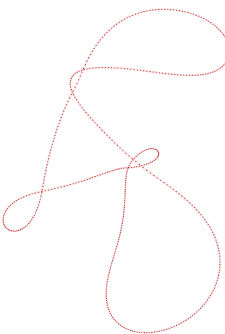   |                                                 |
| NCTC9024 | <i>Escherichia coli</i> | 40 | 0 | 0 | 3 |  |  |     | Finished assembly with multiple traversals<br> |
| NCTC9026 | <i>Escherichia coli</i> | 69 | 1 | 1 | 0 |  |  |    | Possible mis-assembly<br>                     |
| NCTC9029 | <i>Escherichia coli</i> | 47 | 1 | 2 | 4 |  |  |  | Finished circular assembly<br>               |
| NCTC9030 | <i>Escherichia coli</i> | 61 | 1 | 1 | 1 |  |  |  | Finished circular assembly<br>               |
| NCTC9031 | <i>Escherichia coli</i> | 78 | 1 | 1 | 0 |  |  |   | Finished circular assembly<br>               |
| NCTC9032 | <i>Escherichia coli</i> | 70 | 0 | 0 | 1 |  |  |                                                                                       | Finished circular assembly<br>               |

|          |                         |    |   |   |   |                                                                                      |                                                |                                                                                       |
|----------|-------------------------|----|---|---|---|--------------------------------------------------------------------------------------|------------------------------------------------|---------------------------------------------------------------------------------------|
|          |                         |    |   |   |   | 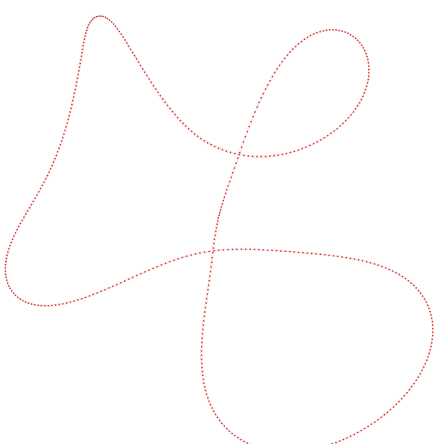    |                                                |     |
| NCTC9033 | <i>Escherichia coli</i> | 36 | 1 | 0 | 0 |    | Finished assembly<br>(lacking circularisation) |    |
| NCTC9034 | <i>Escherichia coli</i> | 80 | 0 | 0 | 3 |   | Finished circular assembly                     |   |
| NCTC9035 | <i>Escherichia coli</i> | 64 | 1 | 0 | 1 |  | Finished circular assembly                     |  |
| NCTC9038 | <i>Escherichia coli</i> | 65 | 1 | 0 | 0 |  | Finished circular assembly                     |  |
| NCTC9040 | <i>Escherichia coli</i> | 58 | 1 | 0 | 0 |  | Finished circular assembly                     |  |
| NCTC9043 | <i>Escherichia coli</i> | 74 | 1 | 1 | 0 |                                                                                      | Finished assembly with multiple traversals     |                                                                                       |

|          |                         |    |         |         |         |                                                                                      |                                             |                                                                                       |
|----------|-------------------------|----|---------|---------|---------|--------------------------------------------------------------------------------------|---------------------------------------------|---------------------------------------------------------------------------------------|
|          |                         |    |         |         |         | 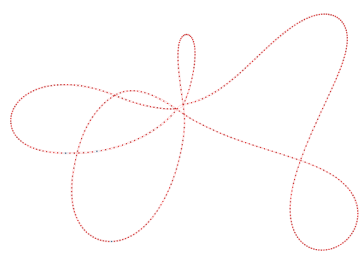  |                                             |     |
| NCTC9044 | <i>Escherichia coli</i> | 26 | Pending | Pending | Pending |    | Mis-assembly/Fragmented                     |    |
| NCTC9045 | <i>Escherichia coli</i> | 32 | 1       | 2       | 1       |   | Finished circular assembly                  |   |
| NCTC9047 | <i>Escherichia coli</i> | 87 | 1       | 0       | 4       |  | Finished circular assembly                  |  |
| NCTC9048 | <i>Escherichia coli</i> | 52 | 1       | 1       | 1       |  | Finished circular assembly                  |  |
| NCTC9049 | <i>Escherichia coli</i> | 49 | 1       | 1       | 0       |  | Finished assembly (lacking circularisation) |  |
| NCTC9050 | <i>Escherichia coli</i> | 70 | 0       | 0       | 4       |                                                                                      | Finished circular assembly                  |                                                                                       |

|          |                         |    |   |   |   |  |                                            |  |
|----------|-------------------------|----|---|---|---|--|--------------------------------------------|--|
|          |                         |    |   |   |   |  |                                            |  |
| NCTC9052 | <i>Escherichia coli</i> | 48 | 1 | 1 | 0 |  | Mis-assembly/Fragmented                    |  |
| NCTC9053 | <i>Escherichia coli</i> | 45 | 1 | 0 | 1 |  | Finished circular assembly                 |  |
| NCTC9054 | <i>Escherichia coli</i> | 35 | 1 | 0 | 0 |  | Finished circular assembly                 |  |
| NCTC9055 | <i>Escherichia coli</i> | 70 | 0 | 0 | 4 |  | Finished assembly with multiple traversals |  |
| NCTC9058 | <i>Escherichia coli</i> | 90 | 0 | 0 | 4 |  | Finished circular assembly                 |  |
| NCTC9060 | <i>Escherichia coli</i> | 91 | 0 | 0 | 2 |  | Finished circular assembly                 |  |

|          |                         |    |         |         |         |                                                                                      |                                             |                                                                                       |
|----------|-------------------------|----|---------|---------|---------|--------------------------------------------------------------------------------------|---------------------------------------------|---------------------------------------------------------------------------------------|
|          |                         |    |         |         |         | 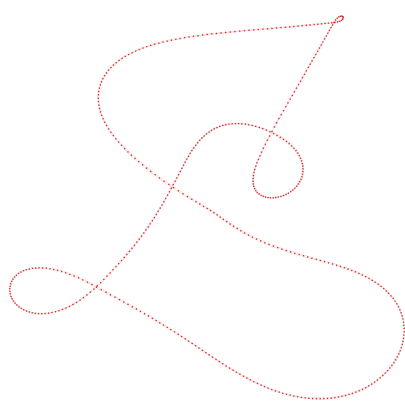    |                                             |     |
| NCTC9062 | <i>Escherichia coli</i> | 67 | 0       | 0       | 5       |    | Finished assembly with multiple traversals  |    |
| NCTC9065 | <i>Escherichia coli</i> | 51 | 1       | 1       | 0       |  | Finished circular assembly                  |   |
| NCTC9066 | <i>Escherichia coli</i> | 89 | 1       | 0       | 0       |  | Finished circular assembly                  |  |
| NCTC9067 | <i>Escherichia coli</i> | 55 | Pending | Pending | Pending |  | Mis-assembly/Fragmented                     |  |
| NCTC9068 | <i>Escherichia coli</i> | 74 | 1       | 2       | 1       |  | Finished circular assembly                  |  |
| NCTC9069 | <i>Escherichia coli</i> | 75 | 1       | 1       | 0       |                                                                                      | Finished assembly (lacking circularisation) |                                                                                       |

|          |                         |    |   |   |    |                                                                                      |                            |                                                                                       |
|----------|-------------------------|----|---|---|----|--------------------------------------------------------------------------------------|----------------------------|---------------------------------------------------------------------------------------|
|          |                         |    |   |   |    | 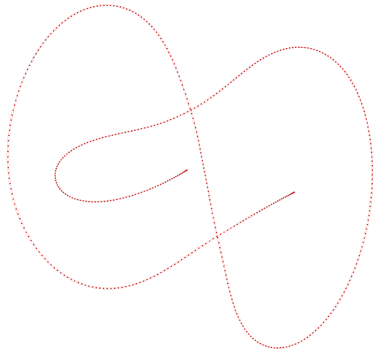   |                            |     |
| NCTC9070 | <i>Escherichia coli</i> | 76 | 1 | 1 | 2  |    | Finished circular assembly |    |
| NCTC9071 | <i>Escherichia coli</i> | 65 | 1 | 0 | 2  |  | Finished circular assembly |   |
| NCTC9073 | <i>Escherichia coli</i> | 18 | 0 | 0 | 12 |  | Mis-assembly/Fragmented    |  |
| NCTC9075 | <i>Escherichia coli</i> | 35 | 1 | 0 | 3  |  | Mis-assembly/Fragmented    |  |
| NCTC9076 | <i>Escherichia coli</i> | 72 | 0 | 0 | 2  |  | Finished circular assembly |  |
| NCTC9077 | <i>Escherichia coli</i> | 31 | 1 | 0 | 2  |                                                                                      | Finished circular assembly |  |

|          |                         |    |   |   |   |                                                                                      |                            |                                                                                       |
|----------|-------------------------|----|---|---|---|--------------------------------------------------------------------------------------|----------------------------|---------------------------------------------------------------------------------------|
|          |                         |    |   |   |   | 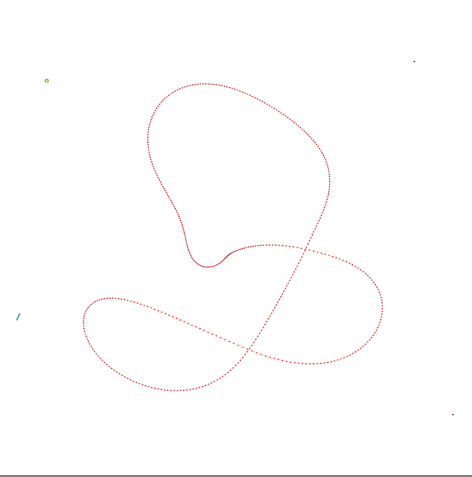    |                            |     |
| NCTC9078 | <i>Escherichia coli</i> | 55 | 1 | 2 | 2 |    | Mis-assembly               |    |
| NCTC9079 | <i>Escherichia coli</i> | 87 | 1 | 0 | 1 |   | Finished circular assembly |   |
| NCTC9081 | <i>Escherichia coli</i> | 0  | 1 | 2 | 5 |  | Mis-assembly/Fragmented    |  |
| NCTC9082 | <i>Escherichia coli</i> | 62 | 1 | 0 | 0 |  | Finished circular assembly |  |
| NCTC9084 | <i>Escherichia coli</i> | 59 | 1 | 0 | 0 |  | Finished circular assembly |  |
| NCTC9085 | <i>Escherichia coli</i> | 50 | 1 | 0 | 0 |                                                                                      | Finished circular assembly |                                                                                       |



|          |                         |    |   |   |   |                                                                                      |                                            |                                                                                       |
|----------|-------------------------|----|---|---|---|--------------------------------------------------------------------------------------|--------------------------------------------|---------------------------------------------------------------------------------------|
|          |                         |    |   |   |   | 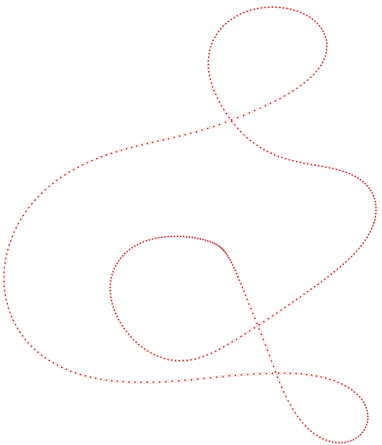    |                                            |     |
| NCTC9086 | <i>Escherichia coli</i> | 69 | 1 | 2 | 0 |    | Finished circular assembly                 |    |
| NCTC9087 | <i>Escherichia coli</i> | 94 | 1 | 0 | 0 |   | Finished circular assembly                 |   |
| NCTC9088 | <i>Escherichia coli</i> | 78 | 1 | 0 | 0 |  | Finished circular assembly                 |  |
| NCTC9089 | <i>Escherichia coli</i> | 40 | 1 | 1 | 0 |  | Finished circular assembly                 |  |
| NCTC9091 | <i>Escherichia coli</i> | 86 | 1 | 0 | 1 |  | Finished circular assembly                 |  |
| NCTC9092 | <i>Escherichia coli</i> | 62 | 0 | 0 | 4 |                                                                                      | Finished assembly with multiple traversals |                                                                                       |

|          |                         |    |         |         |         |                                                                                      |                            |                                                                                       |
|----------|-------------------------|----|---------|---------|---------|--------------------------------------------------------------------------------------|----------------------------|---------------------------------------------------------------------------------------|
|          |                         |    |         |         |         | 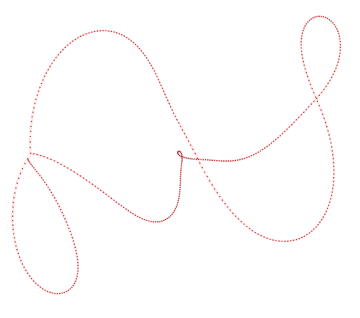   |                            |     |
| NCTC9095 | <i>Escherichia coli</i> | 64 | Pending | Pending | Pending |   | Finished circular assembly |    |
| NCTC9096 | <i>Escherichia coli</i> | 77 | 1       | 1       | 1       |  | Finished circular assembly |   |
| NCTC9097 | <i>Escherichia coli</i> | 54 | 1       | 1       | 0       |  | Finished circular assembly |  |
| NCTC9098 | <i>Escherichia coli</i> | 56 | 1       | 1       | 2       |  | Mis-assembly/Fragmented    |  |
| NCTC9099 | <i>Escherichia coli</i> | 66 | 1       | 1       | 4       |  | Finished circular assembly |  |
| NCTC9100 | <i>Escherichia coli</i> | 80 | 1       | 0       | 0       |                                                                                      | Finished circular assembly |                                                                                       |

|          |                         |    |   |   |    |                                                                                      |                            |                                                                                       |
|----------|-------------------------|----|---|---|----|--------------------------------------------------------------------------------------|----------------------------|---------------------------------------------------------------------------------------|
|          |                         |    |   |   |    | 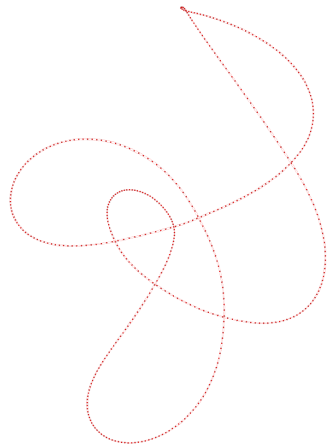    |                            |    |
| NCTC9101 | <i>Escherichia coli</i> | 84 | 1 | 3 | 0  |    | Finished circular assembly |    |
| NCTC9102 | <i>Escherichia coli</i> | 51 | 1 | 0 | 0  |   | Finished circular assembly |   |
| NCTC9103 | <i>Escherichia coli</i> | 98 | 0 | 0 | 18 |  | Finished circular assembly |  |
| NCTC9104 | <i>Escherichia coli</i> | 65 | 1 | 0 | 0  |  | Finished circular assembly |  |
| NCTC9107 | <i>Escherichia coli</i> | 57 | 1 | 0 | 0  |  | Finished circular assembly |  |
| NCTC9108 | <i>Escherichia coli</i> | 49 | 1 | 2 | 0  |                                                                                      | Finished circular assembly |                                                                                       |

|          |                         |    |   |   |   |                                                                                      |                                            |                                                                                       |
|----------|-------------------------|----|---|---|---|--------------------------------------------------------------------------------------|--------------------------------------------|---------------------------------------------------------------------------------------|
|          |                         |    |   |   |   | 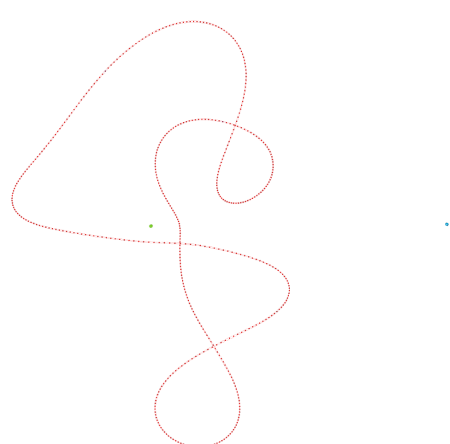    |                                            |     |
| NCTC9109 | <i>Escherichia coli</i> | 61 | 1 | 1 | 1 |    | Finished assembly with multiple traversals |    |
| NCTC9110 | <i>Escherichia coli</i> | 73 | 1 | 0 | 1 |   | Finished circular assembly                 |   |
| NCTC9111 | <i>Escherichia coli</i> | 62 | 1 | 1 | 9 |  | Mis-assembly/Fragmented                    |  |
| NCTC9112 | <i>Escherichia coli</i> | 69 | 1 | 0 | 0 |  | Mis-assembly/Fragmented                    |  |
| NCTC9114 | <i>Escherichia coli</i> | 78 | 1 | 0 | 2 |  | Finished circular assembly                 |  |
| NCTC9116 | <i>Escherichia coli</i> | 49 | 1 | 0 | 2 |                                                                                      | Finished circular assembly                 |                                                                                       |

|          |                          |     |         |         |         |                                                                                      |                                             |                                                                                       |
|----------|--------------------------|-----|---------|---------|---------|--------------------------------------------------------------------------------------|---------------------------------------------|---------------------------------------------------------------------------------------|
|          |                          |     |         |         |         | 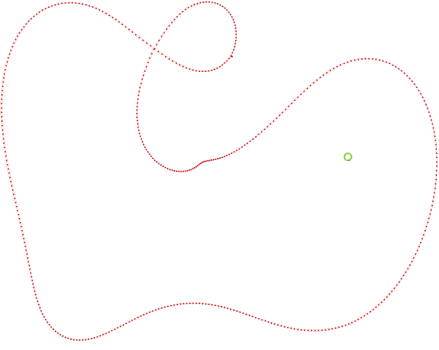   |                                             |     |
| NCTC9117 | <i>Escherichia coli</i>  | 36  | 1       | 0       | 5       |    | Finished circular assembly                  |    |
| NCTC9120 | <i>Escherichia coli</i>  | 66  | 1       | 1       | 3       |   | Finished assembly (lacking circularisation) |   |
| NCTC9121 | <i>Escherichia coli</i>  | 51  | 1       | 1       | 2       |  | Finished assembly (lacking circularisation) |  |
| NCTC9123 | <i>Escherichia coli</i>  | 59  | 1       | 0       | 3       |  | Finished circular assembly                  |  |
| NCTC9124 | <i>Streptococcus sp.</i> | 133 | Pending | Pending | Pending |  | Finished circular assembly                  |  |
| NCTC9127 | <i>Klebsiella sp.</i>    | 43  | 1       | 1       | 0       |                                                                                      | Finished circular assembly                  |                                                                                       |

|          |                              |    |   |   |   |  |                                             |  |
|----------|------------------------------|----|---|---|---|--|---------------------------------------------|--|
|          |                              |    |   |   |   |  |                                             |  |
| NCTC9128 | <i>Klebsiella pneumoniae</i> | 38 | 0 | 0 | 2 |  | Mis-assembly/Fragmented                     |  |
| NCTC9129 | <i>Klebsiella sp.</i>        | 43 | 0 | 0 | 4 |  | Finished circular assembly                  |  |
| NCTC9130 | <i>Klebsiella sp.</i>        | 0  | 1 | 1 | 1 |  | Mis-assembly/Fragmented                     |  |
| NCTC9132 | <i>Klebsiella sp.</i>        | 69 | 0 | 0 | 2 |  | Finished circular assembly                  |  |
| NCTC9133 | <i>Klebsiella sp.</i>        | 71 | 1 | 0 | 1 |  | Finished assembly (lacking circularisation) |  |
| NCTC9134 | <i>Klebsiella pneumoniae</i> | 0  | 0 | 0 | 2 |  | Mis-assembly/Fragmented                     |  |

|          |                              |    |   |   |   |  |                                                   |  |
|----------|------------------------------|----|---|---|---|--|---------------------------------------------------|--|
|          |                              |    |   |   |   |  |                                                   |  |
| NCTC9135 | <i>Klebsiella sp.</i>        | 35 | 0 | 0 | 6 |  | Finished assembly<br>(lacking<br>circularisation) |  |
| NCTC9136 | <i>Klebsiella sp.</i>        | 68 | 1 | 1 | 0 |  | Finished circular<br>assembly                     |  |
| NCTC9137 | <i>Klebsiella sp.</i>        | 64 | 1 | 3 | 0 |  | Finished assembly<br>(lacking<br>circularisation) |  |
| NCTC9138 | <i>Klebsiella sp.</i>        | 52 | 1 | 1 | 0 |  | Finished circular<br>assembly                     |  |
| NCTC9139 | <i>Klebsiella sp.</i>        | 37 | 1 | 1 | 0 |  | Finished circular<br>assembly                     |  |
| NCTC9140 | <i>Klebsiella pneumoniae</i> | 59 | 1 | 3 | 3 |  | Finished circular<br>assembly                     |  |

|          |                              |    |   |   |   |                                                                                      |                                             |                                                                                       |
|----------|------------------------------|----|---|---|---|--------------------------------------------------------------------------------------|---------------------------------------------|---------------------------------------------------------------------------------------|
|          |                              |    |   |   |   | 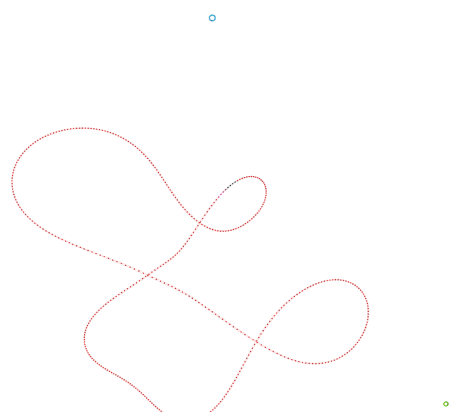    |                                             |     |
| NCTC9142 | <i>Klebsiella sp.</i>        | 70 | 1 | 1 | 0 |    | Finished circular assembly                  |    |
| NCTC9143 | <i>Klebsiella pneumoniae</i> | 24 | 1 | 0 | 4 |   | Mis-assembly/Fragmented                     |   |
| NCTC9144 | <i>Klebsiella sp.</i>        | 56 | 1 | 1 | 1 |  | Finished circular assembly                  |  |
| NCTC9145 | <i>Klebsiella sp.</i>        | 42 | 1 | 1 | 2 |  | Finished assembly (lacking circularisation) |  |
| NCTC9146 | <i>Klebsiella sp.</i>        | 64 | 1 | 0 | 0 |  | Finished circular assembly                  |  |
| NCTC9149 | <i>Klebsiella sp.</i>        | 33 | 1 | 0 | 1 |                                                                                      | Mis-assembly/Fragmented                     |                                                                                       |



|          |                       |    |   |   |   |                                                                                      |                                             |                                                                                       |
|----------|-----------------------|----|---|---|---|--------------------------------------------------------------------------------------|---------------------------------------------|---------------------------------------------------------------------------------------|
|          |                       |    |   |   |   | 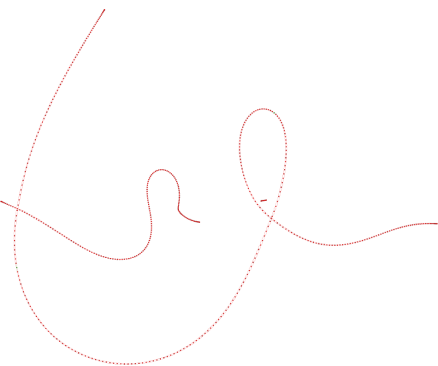   |                                             |     |
| NCTC9150 | <i>Klebsiella sp.</i> | 59 | 1 | 1 | 0 |    | Finished circular assembly                  |    |
| NCTC9151 | <i>Klebsiella sp.</i> | 45 | 1 | 0 | 4 |   | Finished circular assembly                  |   |
| NCTC9152 | <i>Klebsiella sp.</i> | 40 | 1 | 0 | 1 |  | Possible mis-assembly                       |  |
| NCTC9153 | <i>Klebsiella sp.</i> | 47 | 0 | 0 | 3 |  | Finished circular assembly                  |  |
| NCTC9154 | <i>Klebsiella sp.</i> | 32 | 1 | 1 | 0 |  | Finished assembly (lacking circularisation) |  |
| NCTC9155 | <i>Klebsiella sp.</i> | 39 | 0 | 0 | 3 |                                                                                      | Finished circular assembly                  |                                                                                       |

|          |                       |    |   |   |   |                                                                                      |                                             |                                                                                       |
|----------|-----------------------|----|---|---|---|--------------------------------------------------------------------------------------|---------------------------------------------|---------------------------------------------------------------------------------------|
|          |                       |    |   |   |   | 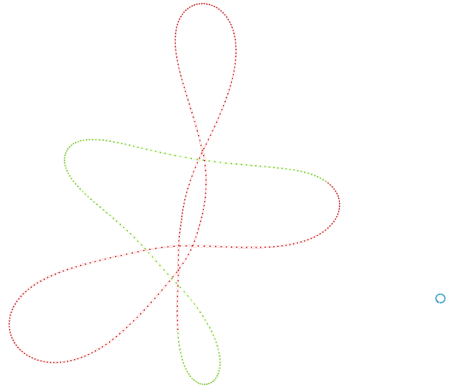   |                                             |     |
| NCTC9156 | <i>Klebsiella sp.</i> | 51 | 1 | 1 | 0 |    | Finished circular assembly                  |    |
| NCTC9157 | <i>Klebsiella sp.</i> | 68 | 1 | 0 | 0 |   | Finished circular assembly                  |   |
| NCTC9158 | <i>Klebsiella sp.</i> | 44 | 1 | 1 | 1 |  | Mis-assembly/Fragmented                     |  |
| NCTC9159 | <i>Klebsiella sp.</i> | 46 | 0 | 0 | 4 |  | Finished circular assembly                  |  |
| NCTC9161 | <i>Klebsiella sp.</i> | 41 | 1 | 1 | 0 |  | Finished circular assembly                  |  |
| NCTC9162 | <i>Klebsiella sp.</i> | 64 | 1 | 0 | 6 |                                                                                      | Finished assembly (lacking circularisation) |                                                                                       |

|          |                       |    |   |   |   |                                                                                      |                            |                                                                                       |
|----------|-----------------------|----|---|---|---|--------------------------------------------------------------------------------------|----------------------------|---------------------------------------------------------------------------------------|
|          |                       |    |   |   |   | 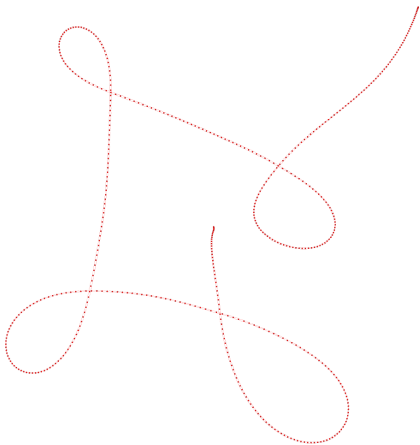    |                            |     |
| NCTC9163 | <i>Klebsiella sp.</i> | 0  | 1 | 2 | 1 |    | Finished circular assembly |    |
| NCTC9164 | <i>Klebsiella sp.</i> | 75 | 1 | 1 | 0 |  | Finished circular assembly |  |
| NCTC9166 | <i>Klebsiella sp.</i> | 61 | 1 | 0 | 1 |  | Finished circular assembly |  |
| NCTC9167 | <i>Klebsiella sp.</i> | 56 | 1 | 0 | 1 |  | Finished circular assembly |  |
| NCTC9169 | <i>Klebsiella sp.</i> | 74 | 1 | 0 | 1 |  | Finished circular assembly |  |
| NCTC9170 | <i>Klebsiella sp.</i> | 85 | 0 | 0 | 1 |                                                                                      | Finished circular assembly |                                                                                       |

|          |                              |     |   |   |   |                                                                                       |                            |                                                                                       |
|----------|------------------------------|-----|---|---|---|---------------------------------------------------------------------------------------|----------------------------|---------------------------------------------------------------------------------------|
|          |                              |     |   |   |   | 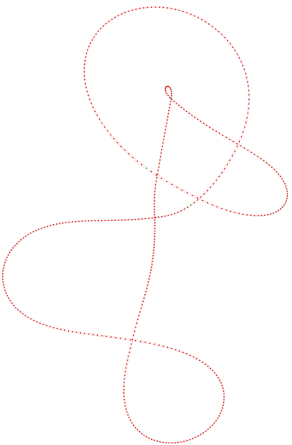    |                            |     |
| NCTC9171 | <i>Klebsiella sp.</i>        | 117 | 1 | 0 | 0 |     | Finished circular assembly |    |
| NCTC9174 | <i>Klebsiella sp.</i>        | 9   | 0 | 0 | 4 |    | Mis-assembly/Fragmented    |   |
| NCTC9175 | <i>Klebsiella sp.</i>        | 31  | 1 | 3 | 0 |  | Finished circular assembly |  |
| NCTC9176 | <i>Klebsiella sp.</i>        | 42  | 1 | 0 | 1 |   | Finished circular assembly |  |
| NCTC9177 | <i>Klebsiella pneumoniae</i> | 65  | 0 | 0 | 4 |   | Mis-assembly/Fragmented    |  |
| NCTC9178 | <i>Klebsiella sp.</i>        | 29  | 0 | 0 | 1 |                                                                                       | Mis-assembly/Fragmented    |                                                                                       |

|          |                       |    |   |   |     |                                                                                      |                                             |                                                                                       |
|----------|-----------------------|----|---|---|-----|--------------------------------------------------------------------------------------|---------------------------------------------|---------------------------------------------------------------------------------------|
|          |                       |    |   |   |     | 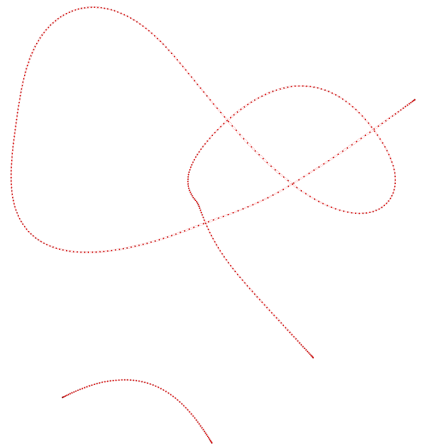    |                                             |     |
| NCTC9179 | <i>Klebsiella sp.</i> | 72 | 1 | 2 | 0   |    | Finished circular assembly                  |    |
| NCTC9180 | <i>Klebsiella sp.</i> | 0  | 0 | 0 | 1   |   | Finished assembly (lacking circularisation) |   |
| NCTC9181 | <i>Klebsiella sp.</i> | 53 | 0 | 0 | 3   |  | Mis-assembly/Fragmented                     |  |
| NCTC9182 | <i>Klebsiella sp.</i> | 72 | 1 | 1 | 0   |  | Finished circular assembly                  |  |
| NCTC9183 | <i>Klebsiella sp.</i> | 24 | 0 | 0 | 3   |  | Mis-assembly/Fragmented                     |  |
| NCTC9184 | <i>Klebsiella sp.</i> | 6  | 0 | 0 | 179 |                                                                                      | Mis-assembly/Fragmented                     |                                                                                       |

|          |                       |    |         |         |         |  |                            |  |
|----------|-----------------------|----|---------|---------|---------|--|----------------------------|--|
|          |                       |    |         |         |         |  |                            |  |
| NCTC9185 | <i>Klebsiella sp.</i> | 24 | 0       | 0       | 2       |  | Mis-assembly/Fragmented    |  |
| NCTC9186 | <i>Klebsiella sp.</i> | 37 | 1       | 2       | 1       |  | Finished circular assembly |  |
| NCTC9187 | <i>Klebsiella sp.</i> | 24 | Pending | Pending | Pending |  | Mis-assembly/Fragmented    |  |
| NCTC9188 | <i>Klebsiella sp.</i> | 63 | 0       | 0       | 2       |  | Finished circular assembly |  |
| NCTC9189 | <i>Klebsiella sp.</i> | 70 | 1       | 0       | 0       |  | Finished circular assembly |  |
| NCTC9239 | <i>Vibrio</i>         | 38 | Pending | Pending | Pending |  | Finished circular assembly |  |

|          |                              |     |         |         |         |  |                            |  |
|----------|------------------------------|-----|---------|---------|---------|--|----------------------------|--|
|          |                              |     |         |         |         |  |                            |  |
| NCTC9309 | <i>Staphylococcus aureus</i> | 50  | 1       | 0       | 2       |  | Mis-assembly/Fragmented    |  |
| NCTC9369 | <i>Staphylococcus aureus</i> | 119 | 1       | 1       | 0       |  | Finished circular assembly |  |
| NCTC9381 | <i>Pantoea agglomerans</i>   | 41  | 1       | 2       | 0       |  | Finished circular assembly |  |
| NCTC9393 | <i>Staphylococcus aureus</i> | 78  | 1       | 1       | 0       |  | Finished circular assembly |  |
| NCTC9413 | <i>Streptococcus sp.</i>     | 104 | Pending | Pending | Pending |  | Finished circular assembly |  |
| NCTC9414 | <i>Streptococcus sp.</i>     | 51  | Pending | Pending | Pending |  | Mis-assembly/Fragmented    |  |

|          |                                                |    |   |   |   |                                                                                      |                                            |                                                                                       |
|----------|------------------------------------------------|----|---|---|---|--------------------------------------------------------------------------------------|--------------------------------------------|---------------------------------------------------------------------------------------|
|          |                                                |    |   |   |   | 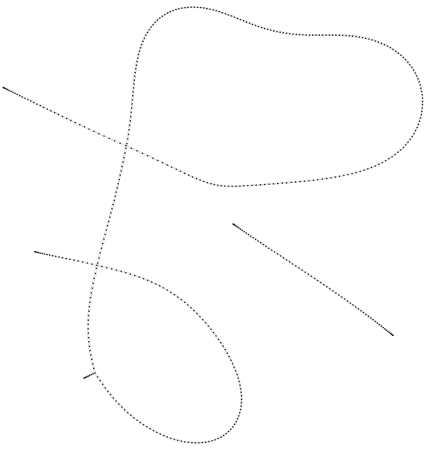    |                                            |     |
| NCTC9419 | <i>Serratia rubidaea</i>                       | 47 | 0 | 0 | 1 |    | Finished circular assembly                 |    |
| NCTC9433 | <i>Pseudomonas aeruginosa</i>                  | 53 | 1 | 0 | 0 |   | Finished circular assembly                 |   |
| NCTC9434 | <i>Escherichia coli</i>                        | 83 | 1 | 1 | 0 |  | Finished assembly with multiple traversals |  |
| NCTC9494 | <i>Klebsiella pneumoniae subsp. pneumoniae</i> | 60 | 1 | 1 | 1 |  | Finished circular assembly                 |  |
| NCTC9495 | <i>Klebsiella sp.</i>                          | 75 | 1 | 1 | 2 |  | Finished circular assembly                 |  |
| NCTC9498 | <i>Klebsiella sp.</i>                          | 51 | 0 | 0 | 4 |                                                                                      | Finished circular assembly                 |                                                                                       |



|          |                                                |     |   |   |   |  |                            |  |
|----------|------------------------------------------------|-----|---|---|---|--|----------------------------|--|
|          |                                                |     |   |   |   |  |                            |  |
| NCTC9504 | <i>Klebsiella pneumoniae subsp. pneumoniae</i> | 45  | 1 | 1 | 3 |  | Finished circular assembly |  |
| NCTC9527 | <i>Klebsiella sp.</i>                          | 85  | 1 | 0 | 3 |  | Finished circular assembly |  |
| NCTC9529 | <i>Cronobacter universalis</i>                 | 88  | 1 | 1 | 0 |  | Finished circular assembly |  |
| NCTC9546 | <i>Staphylococcus aureus</i>                   | 83  | 1 | 0 | 2 |  | Finished circular assembly |  |
| NCTC9547 | <i>Staphylococcus aureus</i>                   | 165 | 1 | 0 | 1 |  | Finished circular assembly |  |
| NCTC9551 | <i>Staphylococcus aureus</i>                   | 45  | 1 | 0 | 2 |  | Finished circular assembly |  |

|          |                              |     |         |         |         |                                                                                      |                            |                                                                                       |
|----------|------------------------------|-----|---------|---------|---------|--------------------------------------------------------------------------------------|----------------------------|---------------------------------------------------------------------------------------|
|          |                              |     |         |         |         | 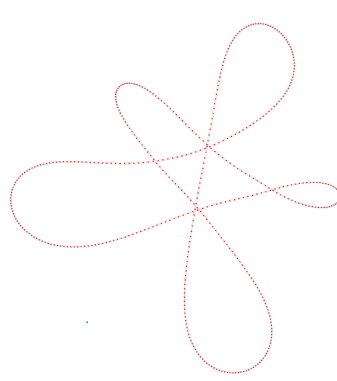   |                            |     |
| NCTC9552 | <i>Staphylococcus aureus</i> | 27  | Pending | Pending | Pending |    | Finished circular assembly |    |
| NCTC9553 | <i>Staphylococcus aureus</i> | 159 | 1       | 1       | 0       |   | Finished circular assembly |   |
| NCTC9555 | <i>Staphylococcus aureus</i> | 72  | 1       | 0       | 0       |  | Finished circular assembly |  |
| NCTC9556 | <i>Staphylococcus aureus</i> | 94  | Pending | Pending | Pending |  | Finished circular assembly |  |
| NCTC9601 | <i>Klebsiella pneumoniae</i> | 25  | 0       | 0       | 4       |  | Mis-assembly/Fragmented    |  |
| NCTC9603 | <i>Streptococcus sp.</i>     | 125 | Pending | Pending | Pending |                                                                                      | Finished circular assembly |                                                                                       |

|          |                              |     |         |         |         |  |                                            |  |
|----------|------------------------------|-----|---------|---------|---------|--|--------------------------------------------|--|
|          |                              |     |         |         |         |  |                                            |  |
| NCTC9606 | <i>Salmonella sp</i>         | 45  | 0       | 0       | 3       |  | Finished assembly with multiple traversals |  |
| NCTC9611 | <i>Staphylococcus aureus</i> | 75  | Pending | Pending | Pending |  | Finished circular assembly                 |  |
| NCTC9612 | <i>Staphylococcus aureus</i> | 130 | 1       | 1       | 0       |  | Finished circular assembly                 |  |
| NCTC9613 | <i>Staphylococcus aureus</i> | 66  | 1       | 1       | 1       |  | Finished circular assembly                 |  |
| NCTC9614 | <i>Staphylococcus aureus</i> | 125 | 1       | 1       | 0       |  | Finished circular assembly                 |  |
| NCTC9616 | <i>Klebsiella sp.</i>        | 45  | 0       | 0       | 4       |  | Finished circular assembly                 |  |

|          |                               |    |         |         |         |                                                                                      |                                            |                                                                                       |
|----------|-------------------------------|----|---------|---------|---------|--------------------------------------------------------------------------------------|--------------------------------------------|---------------------------------------------------------------------------------------|
|          |                               |    |         |         |         | 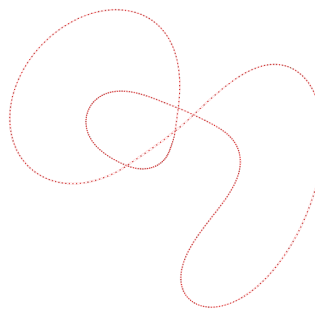   |                                            |     |
| NCTC9617 | <i>Klebsiella sp.</i>         | 22 | 0       | 0       | 9       |    | Mis-assembly/Fragmented                    |    |
| NCTC9632 | <i>Klebsiella pneumoniae</i>  | 67 | 1       | 2       | 3       |  | Finished circular assembly                 |   |
| NCTC9635 | <i>Klebsiella pneumoniae</i>  | 58 | 1       | 2       | 2       |  | Finished circular assembly                 |  |
| NCTC9637 | <i>Klebsiella pneumoniae</i>  | 40 | 1       | 1       | 3       |  | Finished circular assembly                 |  |
| NCTC9644 | <i>Enterobacter aerogenes</i> | 66 | Pending | Pending | Pending |  | Finished assembly with multiple traversals |  |
| NCTC9645 | <i>Klebsiella pneumoniae</i>  | 17 | 0       | 0       | 16      |                                                                                      | Mis-assembly/Fragmented                    |                                                                                       |

|          |                               |    |         |         |         |  |                                            |  |
|----------|-------------------------------|----|---------|---------|---------|--|--------------------------------------------|--|
|          |                               |    |         |         |         |  |                                            |  |
| NCTC9646 | <i>Klebsiella aerogenes</i>   | 24 | Pending | Pending | Pending |  | Mis-assembly/Fragmented                    |  |
| NCTC9652 | <i>Enterobacter aerogenes</i> | 34 | Pending | Pending | Pending |  | Finished circular assembly                 |  |
| NCTC9656 | <i>Klebsiella pneumoniae</i>  | 46 | 0       | 0       | 7       |  | Finished circular assembly                 |  |
| NCTC9657 | <i>Klebsiella pneumoniae</i>  | 43 | 0       | 0       | 7       |  | Finished assembly with multiple traversals |  |
| NCTC9660 | <i>Klebsiella pneumoniae</i>  | 73 | 0       | 0       | 5       |  | Finished circular assembly                 |  |
| NCTC9661 | <i>Klebsiella pneumoniae</i>  | 54 | 0       | 0       | 6       |  | Finished circular assembly                 |  |

|          |                                            |    |   |   |   |                                                                                      |                            |                                                                                       |
|----------|--------------------------------------------|----|---|---|---|--------------------------------------------------------------------------------------|----------------------------|---------------------------------------------------------------------------------------|
|          |                                            |    |   |   |   | 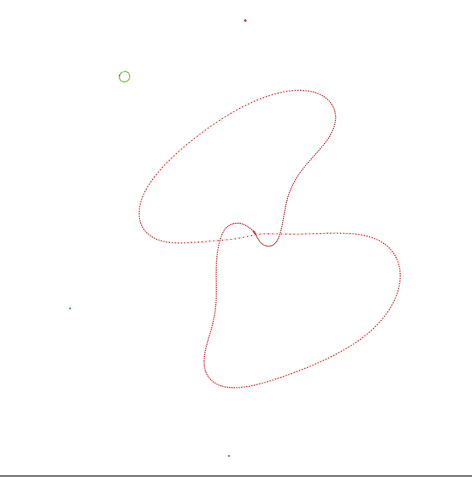    |                            |     |
| NCTC9662 | <i>Klebsiella pneumoniae</i>               | 52 | 0 | 0 | 9 |    | Mis-assembly/Fragmented    |    |
| NCTC9667 | <i>Enterobacter aerogenes</i>              | 39 | 0 | 0 | 2 |   | Finished circular assembly |   |
| NCTC9668 | <i>Enterobacter aerogenes</i>              | 58 | 0 | 0 | 1 |  | Mis-assembly/Fragmented    |  |
| NCTC9684 | <i>Salmonella enterica subsp. enterica</i> | 31 | 1 | 0 | 0 |  | Finished circular assembly |  |
| NCTC9695 | <i>Chromobacterium violaceum</i>           | 34 | 1 | 0 | 0 |  | Mis-assembly/Fragmented    |  |
| NCTC9699 | <i>Escherichia coli</i>                    | 77 | 1 | 0 | 0 |                                                                                      | Finished circular assembly |                                                                                       |

|          |                         |     |         |         |         |  |                                            |  |
|----------|-------------------------|-----|---------|---------|---------|--|--------------------------------------------|--|
|          |                         |     |         |         |         |  |                                            |  |
| NCTC9701 | <i>Escherichia coli</i> | 85  | 1       | 1       | 0       |  | Finished circular assembly                 |  |
| NCTC9702 | <i>Escherichia coli</i> | 36  | 1       | 0       | 0       |  | Finished circular assembly                 |  |
| NCTC9703 | <i>Escherichia coli</i> | 57  | Pending | Pending | Pending |  | Finished assembly with multiple traversals |  |
| NCTC9705 | <i>Escherichia coli</i> | 102 | Pending | Pending | Pending |  | Finished circular assembly                 |  |
| NCTC9707 | <i>Escherichia coli</i> | 71  | 0       | 0       | 6       |  | Mis-assembly/Fragmented                    |  |
| NCTC9708 | <i>Escherichia coli</i> | 50  | 1       | 1       | 4       |  | Possible mis-assembly                      |  |

|          |                                  |     |         |         |         |                                                                                      |                                             |                                                                                       |
|----------|----------------------------------|-----|---------|---------|---------|--------------------------------------------------------------------------------------|---------------------------------------------|---------------------------------------------------------------------------------------|
|          |                                  |     |         |         |         | 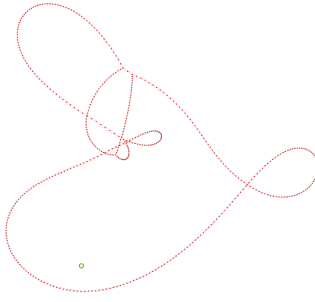   |                                             |     |
| NCTC9750 | <i>Citrobacter freundii</i>      | 78  | 1       | 0       | 0       |    | Finished circular assembly                  |    |
| NCTC9752 | <i>Staphylococcus aureus</i>     | 112 | 1       | 0       | 0       |   | Finished circular assembly                  |   |
| NCTC9757 | <i>Chromobacterium violaceum</i> | 27  | Pending | Pending | Pending |  | Mis-assembly/Fragmented                     |  |
| NCTC9775 | <i>Escherichia coli</i>          | 43  | 0       | 0       | 7       |  | Finished assembly (lacking circularisation) |  |
| NCTC9776 | <i>Escherichia coli</i>          | 61  | 1       | 1       | 0       |  | Mis-assembly/Fragmented                     |  |
| NCTC9777 | <i>Escherichia coli</i>          | 59  | 0       | 0       | 11      |                                                                                      | Mis-assembly/Fragmented                     |                                                                                       |



|          |                                            |    |         |         |         |                                                                                      |                            |                                                                                       |
|----------|--------------------------------------------|----|---------|---------|---------|--------------------------------------------------------------------------------------|----------------------------|---------------------------------------------------------------------------------------|
|          |                                            |    |         |         |         | 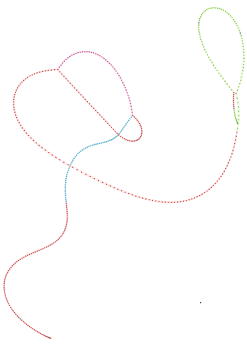  |                            |     |
| NCTC9778 | <i>Escherichia coli</i>                    | 35 | Pending | Pending | Pending |    | Finished circular assembly |    |
| NCTC9793 | <i>Enterobacter aerogenes</i>              | 57 | Pending | Pending | Pending |  | Finished circular assembly |  |
| NCTC9828 | <i>Streptococcus agalactiae</i>            | 24 | Pending | Pending | Pending |  | Mis-assembly/Fragmented    |  |
| NCTC9855 | <i>Escherichia coli</i>                    | 54 | 1       | 2       | 1       |  | Finished circular assembly |  |
| NCTC9868 | <i>Salmonella enterica subsp. enterica</i> | 57 | 1       | 1       | 0       |  | Finished circular assembly |  |
| NCTC9944 | <i>Staphylococcus aureus</i>               | 79 | 1       | 0       | 0       |                                                                                      | Finished circular assembly |                                                                                       |

|          |                            |    |   |   |    |                                                                                       |                                             |                                                                                       |
|----------|----------------------------|----|---|---|----|---------------------------------------------------------------------------------------|---------------------------------------------|---------------------------------------------------------------------------------------|
|          |                            |    |   |   |    | 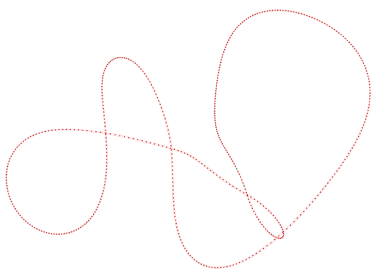    |                                             |     |
| NCTC9948 | <i>Salmonella enterica</i> | 56 | 1 | 0 | 0  |     | Finished circular assembly                  |    |
| NCTC9961 | <i>Escherichia coli</i>    | 0  | 0 | 0 | 2  |    | Finished circular assembly                  |   |
| NCTC9962 | <i>Escherichia coli</i>    | 26 | 0 | 0 | 23 |  | Finished assembly (lacking circularisation) |  |
| NCTC9963 | <i>Escherichia coli</i>    | 45 | 1 | 0 | 2  |   | Finished circular assembly                  |  |
| NCTC9964 | <i>Escherichia coli</i>    | 63 | 1 | 0 | 1  |   | Finished assembly with multiple traversals  |  |
| NCTC9965 | <i>Escherichia coli</i>    | 35 | 1 | 1 | 2  |                                                                                       | Finished circular assembly                  |                                                                                       |

|           |                               |    |   |   |   |                                                                                      |                                             |                                                                                       |
|-----------|-------------------------------|----|---|---|---|--------------------------------------------------------------------------------------|---------------------------------------------|---------------------------------------------------------------------------------------|
|           |                               |    |   |   |   | 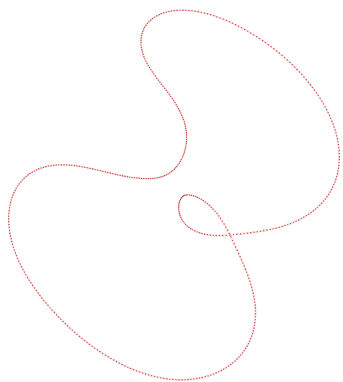   |                                             |     |
| NCTC9966  | <i>Escherichia coli</i>       | 54 | 1 | 0 | 0 |    | Mis-assembly/Fragmented                     |    |
| NCTC9967  | <i>Escherichia coli</i>       | 82 | 1 | 0 | 0 |  | Finished circular assembly                  |   |
| NCTC9969  | <i>Escherichia coli</i>       | 59 | 1 | 2 | 4 |  | Finished assembly (lacking circularisation) |  |
| NCTC9997  | <i>Enterobacter aerogenes</i> | 42 | 1 | 0 | 2 |  | Finished circular assembly                  |  |
| NCTC10002 | <i>Escherichia coli</i>       | 63 | 0 | 0 | 5 |  | Finished circular assembly                  |  |
| NCTC10004 | <i>Klebsiella aerogenes</i>   | 58 | 0 | 0 | 4 |                                                                                      | Finished circular assembly                  |                                                                                       |

|           |                                            |     |         |         |         |                                                                                       |                                                                                                                                     |
|-----------|--------------------------------------------|-----|---------|---------|---------|---------------------------------------------------------------------------------------|-------------------------------------------------------------------------------------------------------------------------------------|
|           |                                            |     |         |         |         | 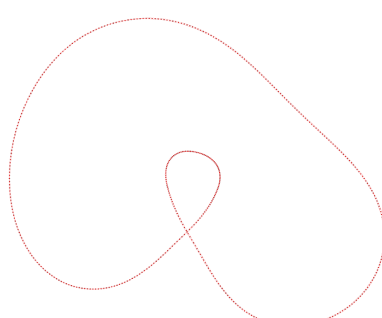    |                                                   |
| NCTC10005 | <i>Enterobacter cloacae</i>                | 67  | 1       | 0       | 6       |     | Mis-assembly/Fragmented<br>                      |
| NCTC10006 | <i>Enterobacter aerogenes</i>              | 56  | 1       | 0       | 0       |    | Mis-assembly/Fragmented<br>                     |
| NCTC10016 | <i>Elizabethkingia meningoseptica</i>      | 63  | Pending | Pending | Pending |   | Finished circular assembly<br>                 |
| NCTC10035 | <i>Staphylococcus aureus</i>               | 126 | 1       | 2       | 1       |  | Finished assembly with multiple traversals<br> |
| NCTC10038 | <i>Pseudomonas fluorescens</i>             | 41  | Pending | Pending | Pending |   | Finished circular assembly<br>                 |
| NCTC10047 | <i>Salmonella enterica subsp. arizonae</i> | 52  | 1       | 0       | 0       |                                                                                       | Finished circular assembly                                                                                                          |

|           |                                              |    |         |         |         |                                                                                      |                            |                                                                                       |
|-----------|----------------------------------------------|----|---------|---------|---------|--------------------------------------------------------------------------------------|----------------------------|---------------------------------------------------------------------------------------|
|           |                                              |    |         |         |         | 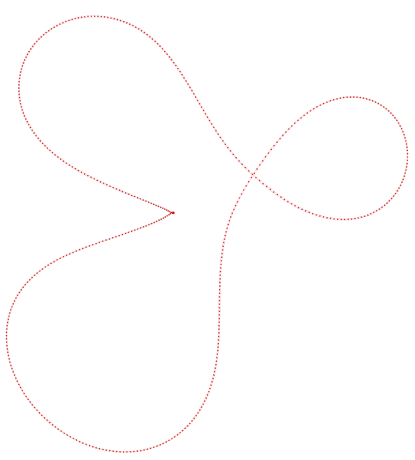    |                            |     |
| NCTC10060 | <i>Salmonella enterica subsp. diarizonae</i> | 41 | 0       | 0       | 5       |    | Finished circular assembly |    |
| NCTC10081 | <i>Salmonella enterica subsp. enterica</i>   | 55 | 1       | 0       | 2       |   | Finished circular assembly |   |
| NCTC10086 | <i>Escherichia coli</i>                      | 62 | 1       | 0       | 6       |  | Finished circular assembly |  |
| NCTC10087 | <i>Escherichia coli</i>                      | 58 | 1       | 1       | 0       |  | Finished circular assembly |  |
| NCTC10089 | <i>Escherichia coli</i>                      | 70 | 1       | 3       | 3       |  | Mis-assembly/Fragmented    |  |
| NCTC10090 | <i>Escherichia coli</i>                      | 79 | Pending | Pending | Pending |                                                                                      | Mis-assembly/Fragmented    |                                                                                       |

|           |                                                  |     |         |         |         |                                                                                       |                                            |                                                                                       |
|-----------|--------------------------------------------------|-----|---------|---------|---------|---------------------------------------------------------------------------------------|--------------------------------------------|---------------------------------------------------------------------------------------|
|           |                                                  |     |         |         |         | 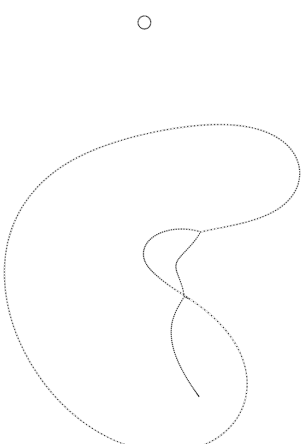     |                                            |     |
| NCTC10211 | <i>Serratia marcescens</i>                       | 67  | 0       | 0       | 3       |     | Finished circular assembly                 |    |
| NCTC10212 | <i>Neisseria animalis</i>                        | 106 | Pending | Pending | Pending |    | Finished assembly with multiple traversals |   |
| NCTC10213 | <i>Klebsiella edwardsii</i> var. <i>atlantae</i> | 55  | 1       | 1       | 5       |  | Finished circular assembly                 |  |
| NCTC10217 | <i>Yersinia pseudotuberculosis</i>               | 66  | 1       | 0       | 0       |   | Finished circular assembly                 |  |
| NCTC10221 | <i>Actinobacillus ureae</i>                      | 98  | Pending | Pending | Pending |   | Finished circular assembly                 |  |
| NCTC10232 | <i>Streptococcus</i> sp.                         | 95  | Pending | Pending | Pending |                                                                                       | Finished circular assembly                 |                                                                                       |

|           |                              |    |         |         |         |  |                                             |  |
|-----------|------------------------------|----|---------|---------|---------|--|---------------------------------------------|--|
|           |                              |    |         |         |         |  |                                             |  |
| NCTC10237 | <i>Streptococcus sp.</i>     | 33 | Pending | Pending | Pending |  | Finished circular assembly                  |  |
| NCTC10238 | <i>Streptococcus sp.</i>     | 31 | Pending | Pending | Pending |  | Mis-assembly/Fragmented                     |  |
| NCTC10246 | <i>Klebsiella pneumoniae</i> | 47 | 1       | 1       | 3       |  | Finished circular assembly                  |  |
| NCTC10261 | <i>Klebsiella sp.</i>        | 36 | Pending | Pending | Pending |  | Finished assembly (lacking circularisation) |  |
| NCTC10262 | <i>Klebsiella sp.</i>        | 80 | 1       | 2       | 0       |  | Finished circular assembly                  |  |
| NCTC10263 | <i>Klebsiella sp.</i>        | 54 | 0       | 0       | 7       |  | Finished circular assembly                  |  |

|           |                                             |    |         |         |         |  |                                                |  |
|-----------|---------------------------------------------|----|---------|---------|---------|--|------------------------------------------------|--|
|           |                                             |    |         |         |         |  |                                                |  |
| NCTC10286 | <i>Providencia alcalifaciens</i>            | 41 | 1       | 0       | 0       |  | Finished assembly<br>(lacking circularisation) |  |
| NCTC10313 | <i>Klebsiella pneumoniae subsp. ozaenae</i> | 40 | 1       | 3       | 2       |  | Finished circular assembly                     |  |
| NCTC10314 | <i>Klebsiella pneumoniae</i>                | 48 | 1       | 0       | 1       |  | Finished circular assembly                     |  |
| NCTC10317 | <i>Enterobacter aerogenes</i>               | 58 | Pending | Pending | Pending |  | Finished circular assembly                     |  |
| NCTC10321 | <i>Streptococcus sp.</i>                    | 70 | 0       | 0       | 2       |  | Finished circular assembly                     |  |
| NCTC10332 | <i>Pseudomonas aeruginosa</i>               | 36 | 1       | 0       | 0       |  | Mis-assembly/Fragmented                        |  |



|           |                                   |     |         |         |         |  |                            |  |
|-----------|-----------------------------------|-----|---------|---------|---------|--|----------------------------|--|
|           |                                   |     |         |         |         |  |                            |  |
| NCTC10344 | <i>Staphylococcus aureus</i>      | 117 | 1       | 0       | 0       |  | Finished circular assembly |  |
| NCTC10345 | <i>Staphylococcus aureus</i>      | 136 | 1       | 0       | 1       |  | Finished circular assembly |  |
| NCTC10350 | <i>Staphylococcus hyicus</i>      | 121 | Pending | Pending | Pending |  | Finished circular assembly |  |
| NCTC10353 | <i>Streptococcus thermophilus</i> | 160 | Pending | Pending | Pending |  | Finished circular assembly |  |
| NCTC10360 | <i>Plesiomonas shigelloides</i>   | 60  | 1       | 0       | 0       |  | Finished circular assembly |  |
| NCTC10361 | <i>Escherichia coli</i>           | 65  | 0       | 0       | 5       |  | Finished circular assembly |  |

|           |                                                                |    |         |         |         |                                                                                       |                                             |                                                                                       |
|-----------|----------------------------------------------------------------|----|---------|---------|---------|---------------------------------------------------------------------------------------|---------------------------------------------|---------------------------------------------------------------------------------------|
|           |                                                                |    |         |         |         | 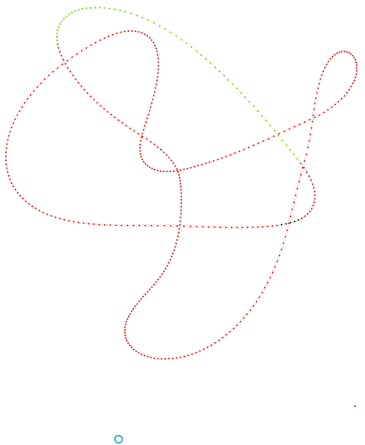     |                                             |     |
| NCTC10382 | <i>Pasteurella multocida</i>                                   | 95 | 1       | 0       | 0       |     | Finished circular assembly                  |    |
| NCTC10384 | <i>Salmonella enterica subsp. enterica serovar Senftenberg</i> | 38 | 4       | 0       | 0       |   | Mis-assembly/Fragmented                     |   |
| NCTC10396 | <i>Edwardsiella tarda</i>                                      | 47 | 0       | 0       | 2       |   | Finished assembly (lacking circularisation) |  |
| NCTC10399 | <i>Staphylococcus aureus</i>                                   | 83 | Pending | Pending | Pending |  | Finished circular assembly                  |  |
| NCTC10418 | <i>Escherichia coli</i>                                        | 45 | 1       | 1       | 0       |   | Finished circular assembly                  |  |
| NCTC10429 | <i>Escherichia coli</i>                                        | 21 | 0       | 0       | 7       |                                                                                       | Mis-assembly/Fragmented                     |                                                                                       |

|           |                                |     |         |         |         |  |                            |  |
|-----------|--------------------------------|-----|---------|---------|---------|--|----------------------------|--|
|           |                                |     |         |         |         |  |                            |  |
| NCTC10430 | <i>Escherichia coli</i>        | 39  | 0       | 0       | 1       |  | Mis-assembly/Fragmented    |  |
| NCTC10442 | <i>Staphylococcus aureus</i>   | 170 | 1       | 0       | 2       |  | Finished circular assembly |  |
| NCTC10443 | <i>Staphylococcus aureus</i>   | 140 | 1       | 0       | 1       |  | Finished circular assembly |  |
| NCTC10444 | <i>Escherichia coli</i>        | 61  | 1       | 0       | 0       |  | Mis-assembly/Fragmented    |  |
| NCTC10449 | <i>Streptococcus mutans</i>    | 160 | Pending | Pending | Pending |  | Finished circular assembly |  |
| NCTC10460 | <i>Yersinia enterocolitica</i> | 0   | Pending | Pending | Pending |  | Mis-assembly/Fragmented    |  |

|           |                                   |     |         |         |         |  |                                             |  |
|-----------|-----------------------------------|-----|---------|---------|---------|--|---------------------------------------------|--|
|           |                                   |     |         |         |         |  |                                             |  |
| NCTC10487 | <i>Escherichia coli</i>           | 58  | 1       | 4       | 1       |  | Finished circular assembly                  |  |
| NCTC10517 | <i>Staphylococcus xylosus</i>     | 100 | 0       | 0       | 89      |  | Finished circular assembly                  |  |
| NCTC10518 | <i>Staphylococcus warneri</i>     | 119 | 1       | 0       | 1       |  | Finished circular assembly                  |  |
| NCTC10530 | <i>Staphylococcus chromogenes</i> | 121 | Pending | Pending | Pending |  | Finished circular assembly                  |  |
| NCTC10535 | <i>Pasteurella bettyae</i>        | 80  | 0       | 0       | 2       |  | Finished circular assembly                  |  |
| NCTC10537 | <i>Escherichia coli</i>           | 46  | 1       | 0       | 0       |  | Finished assembly (lacking circularisation) |  |

|           |                                                   |     |   |   |   |                                                                                      |                                             |                                                                                       |
|-----------|---------------------------------------------------|-----|---|---|---|--------------------------------------------------------------------------------------|---------------------------------------------|---------------------------------------------------------------------------------------|
|           |                                                   |     |   |   |   | 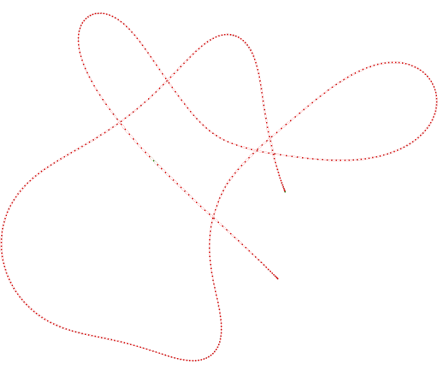   |                                             |     |
| NCTC10538 | <i>Escherichia coli</i>                           | 58  | 1 | 0 | 1 |    | Finished circular assembly                  |    |
| NCTC10562 | <i>Fusobacterium nucleatum subsp. polymorphum</i> | 64  | 1 | 1 | 0 |  | Finished assembly (lacking circularisation) |   |
| NCTC10568 | <i>Actinobacillus lignieresii</i>                 | 69  | 1 | 0 | 0 |  | Finished assembly (lacking circularisation) |  |
| NCTC10588 | <i>Elizabethkingia meningoseptica</i>             | 52  | 1 | 0 | 2 |  | Finished circular assembly                  |  |
| NCTC10609 | <i>Mannheimia haemolytica</i>                     | 34  | 1 | 0 | 0 |  | Finished assembly (lacking circularisation) |  |
| NCTC10618 | <i>Neisseria lactamica</i>                        | 141 | 1 | 0 | 1 |                                                                                      | Finished circular assembly                  |                                                                                       |

|           |                               |     |         |         |         |                                                                                      |                                             |                                                                                       |
|-----------|-------------------------------|-----|---------|---------|---------|--------------------------------------------------------------------------------------|---------------------------------------------|---------------------------------------------------------------------------------------|
|           |                               |     |         |         |         | 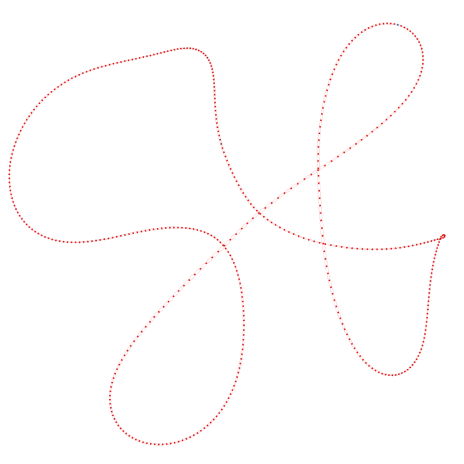    |                                             |     |
| NCTC10638 | <i>Mannheimia haemolytica</i> | 41  | 1       | 0       | 1       |    | Finished assembly (lacking circularisation) |    |
| NCTC10650 | <i>Escherichia coli</i>       | 107 | 0       | 0       | 11      |   | Finished circular assembly                  |   |
| NCTC10652 | <i>Staphylococcus aureus</i>  | 96  | 1       | 1       | 0       |  | Finished circular assembly                  |  |
| NCTC10654 | <i>Staphylococcus aureus</i>  | 96  | 1       | 1       | 2       |  | Finished circular assembly                  |  |
| NCTC10655 | <i>Staphylococcus aureus</i>  | 203 | Pending | Pending | Pending |  | Mis-assembly/Fragmented                     |  |
| NCTC10656 | <i>Staphylococcus aureus</i>  | 48  | 1       | 1       | 0       |                                                                                      | Finished circular assembly                  |                                                                                       |

|           |                                   |     |   |   |   |                                                                                      |                            |                                                                                       |
|-----------|-----------------------------------|-----|---|---|---|--------------------------------------------------------------------------------------|----------------------------|---------------------------------------------------------------------------------------|
|           |                                   |     |   |   |   | 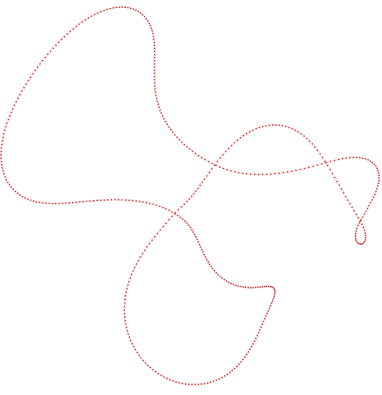    |                            |    |
| NCTC10657 | <i>Staphylococcus aureus</i>      | 132 | 1 | 1 | 0 |    | Finished circular assembly |    |
| NCTC10662 | <i>Pseudomonas aeruginosa</i>     | 37  | 0 | 0 | 3 |   | Finished circular assembly |   |
| NCTC10664 | <i>Escherichia coli</i>           | 71  | 0 | 0 | 5 |  | Finished circular assembly |  |
| NCTC10672 | <i>Haemophilus parainfluenzae</i> | 124 | 0 | 0 | 2 |  | Finished circular assembly |  |
| NCTC10674 | <i>Escherichia coli</i>           | 78  | 1 | 1 | 3 |  | Finished circular assembly |  |
| NCTC10702 | <i>Staphylococcus aureus</i>      | 24  | 1 | 1 | 1 |                                                                                      | Mis-assembly/Fragmented    |                                                                                       |

|           |                                |     |         |         |         |                                                                                      |                            |                                                                                       |
|-----------|--------------------------------|-----|---------|---------|---------|--------------------------------------------------------------------------------------|----------------------------|---------------------------------------------------------------------------------------|
|           |                                |     |         |         |         | 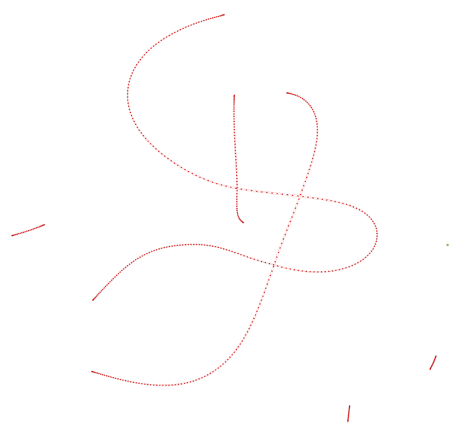    |                            |     |
| NCTC10703 | <i>Staphylococcus aureus</i>   | 95  | 1       | 1       | 1       |    | Finished circular assembly |    |
| NCTC10705 | <i>Salmonella enterica</i>     | 41  | 1       | 2       | 1       |   | Finished circular assembly |   |
| NCTC10707 | <i>Streptococcus sp.</i>       | 67  | Pending | Pending | Pending |  | Mis-assembly/Fragmented    |  |
| NCTC10710 | <i>Streptococcus sp</i>        | 190 | 1       | 0       | 0       |  | Finished circular assembly |  |
| NCTC10713 | <i>Streptococcus anginosus</i> | 177 | Pending | Pending | Pending |  | Finished circular assembly |  |
| NCTC10722 | <i>Pasteurella multocida</i>   | 129 | 1       | 1       | 0       |                                                                                      | Finished circular assembly |                                                                                       |



|           |                                 |    |         |         |         |  |                                             |  |
|-----------|---------------------------------|----|---------|---------|---------|--|---------------------------------------------|--|
|           |                                 |    |         |         |         |  |                                             |  |
| NCTC10723 | <i>Fusobacterium necrogenes</i> | 92 | Pending | Pending | Pending |  | Finished circular assembly                  |  |
| NCTC10724 | <i>Staphylococcus aureus</i>    | 34 | 1       | 1       | 4       |  | Finished assembly (lacking circularisation) |  |
| NCTC10757 | <i>Escherichia coli</i>         | 27 | 0       | 0       | 6       |  | Mis-assembly/Fragmented                     |  |
| NCTC10758 | <i>Escherichia coli</i>         | 35 | 1       | 0       | 5       |  | Finished assembly (lacking circularisation) |  |
| NCTC10764 | <i>Escherichia coli</i>         | 47 | 0       | 0       | 8       |  | Possible mis-assembly                       |  |
| NCTC10766 | <i>Escherichia alkalescens</i>  | 37 | 0       | 0       | 11      |  | Possible mis-assembly                       |  |

|           |                                     |    |         |         |         |  |                            |  |
|-----------|-------------------------------------|----|---------|---------|---------|--|----------------------------|--|
|           |                                     |    |         |         |         |  |                            |  |
| NCTC10767 | <i>Escherichia alkalescens</i>      | 50 | Pending | Pending | Pending |  | Mis-assembly/Fragmented    |  |
| NCTC10768 | <i>Citrobacter koseri</i>           | 52 | 1       | 0       | 5       |  | Finished circular assembly |  |
| NCTC10786 | <i>Citrobacter koseri</i>           | 42 | 1       | 1       | 0       |  | Finished circular assembly |  |
| NCTC10788 | <i>Staphylococcus aureus</i>        | 70 | 0       | 0       | 3       |  | Finished circular assembly |  |
| NCTC10794 | <i>Haemophilus parahaemolyticus</i> | 26 | 0       | 0       | 3       |  | Mis-assembly/Fragmented    |  |
| NCTC10796 | <i>Chryseobacterium indologenes</i> | 32 | Pending | Pending | Pending |  | Finished circular assembly |  |

|           |                                  |     |   |   |   |  |                                             |  |
|-----------|----------------------------------|-----|---|---|---|--|---------------------------------------------|--|
|           |                                  |     |   |   |   |  |                                             |  |
| NCTC10804 | <i>Staphylococcus aureus</i>     | 61  | 1 | 1 | 0 |  | Finished circular assembly                  |  |
| NCTC10805 | <i>Citrobacter amalonaticus</i>  | 68  | 1 | 2 | 0 |  | Finished circular assembly                  |  |
| NCTC10807 | <i>Achromobacter xylooxidans</i> | 65  | 1 | 0 | 0 |  | Finished assembly (lacking circularisation) |  |
| NCTC10810 | <i>Citrobacter koseri</i>        | 67  | 1 | 2 | 0 |  | Finished circular assembly                  |  |
| NCTC10833 | <i>Staphylococcus aureus</i>     | 102 | 1 | 1 | 1 |  | Mis-assembly/Fragmented                     |  |
| NCTC10848 | <i>Serratia rubidaea</i>         | 56  | 1 | 0 | 0 |  | Finished circular assembly                  |  |

|           |                               |    |   |   |   |                                                                                      |                            |                                                                                       |
|-----------|-------------------------------|----|---|---|---|--------------------------------------------------------------------------------------|----------------------------|---------------------------------------------------------------------------------------|
|           |                               |    |   |   |   | 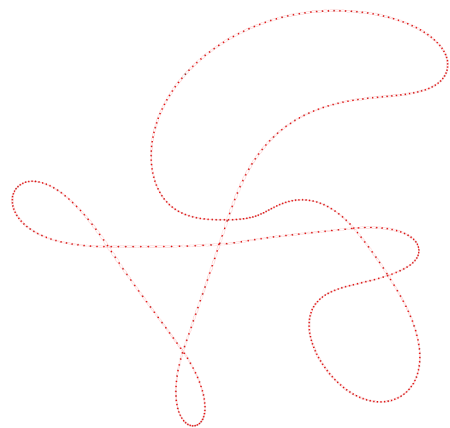    |                            |     |
| NCTC10849 | <i>Citrobacter koseri</i>     | 47 | 1 | 1 | 0 |    | Finished circular assembly |    |
| NCTC10850 | <i>Escherichia coli</i>       | 60 | 0 | 0 | 2 |   | Finished circular assembly |   |
| NCTC10855 | <i>Escherichia aureescens</i> | 44 | 0 | 0 | 5 |  | Mis-assembly/Fragmented    |  |
| NCTC10863 | <i>Escherichia coli</i>       | 49 | 1 | 1 | 0 |  | Finished circular assembly |  |
| NCTC10864 | <i>Escherichia coli</i>       | 46 | 0 | 0 | 6 |  | Finished circular assembly |  |
| NCTC10865 | <i>Escherichia coli</i>       | 32 | 1 | 0 | 5 |                                                                                      | Finished circular assembly |                                                                                       |

|           |                                |     |         |         |         |                                                                                      |                                             |                                                                                       |
|-----------|--------------------------------|-----|---------|---------|---------|--------------------------------------------------------------------------------------|---------------------------------------------|---------------------------------------------------------------------------------------|
|           |                                |     |         |         |         | 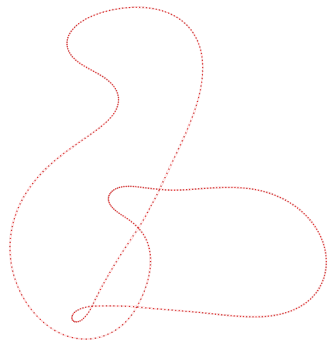    |                                             |     |
| NCTC10866 | <i>Streptococcus pyogenes</i>  | 151 | Pending | Pending | Pending |    | Finished circular assembly                  |    |
| NCTC10872 | <i>Streptococcus pyogenes</i>  | 129 | Pending | Pending | Pending |  | Finished circular assembly                  |   |
| NCTC10884 | <i>Vibrio parahaemolyticus</i> | 82  | 0       | 0       | 2       |  | Finished circular assembly                  |  |
| NCTC10897 | <i>Pseudomonas mendocina</i>   | 52  | Pending | Pending | Pending |  | Finished assembly (lacking circularisation) |  |
| NCTC10903 | <i>Vibrio parahaemolyticus</i> | 48  | Pending | Pending | Pending |  | Finished circular assembly                  |  |
| NCTC10904 | <i>Streptococcus sanguinis</i> | 97  | 1       | 0       | 0       |                                                                                      | Finished assembly (lacking circularisation) |                                                                                       |

|           |                              |     |   |   |   |                                                                                      |                                             |                                                                                       |
|-----------|------------------------------|-----|---|---|---|--------------------------------------------------------------------------------------|---------------------------------------------|---------------------------------------------------------------------------------------|
|           |                              |     |   |   |   | 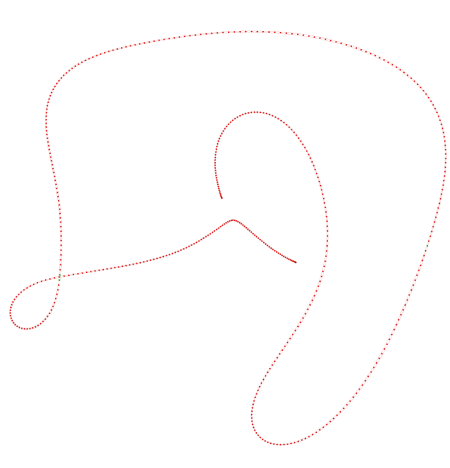    |                                             |     |
| NCTC10907 | <i>Bordetella pertussis</i>  | 44  | 0 | 0 | 2 |    | Finished assembly (lacking circularisation) |    |
| NCTC10923 | <i>Streptococcus mutans</i>  | 73  | 0 | 0 | 2 |   | Finished circular assembly                  |   |
| NCTC10924 | <i>Streptococcus sp</i>      | 219 | 1 | 0 | 0 |  | Finished circular assembly                  |  |
| NCTC10925 | <i>Streptococcus sp.</i>     | 146 | 1 | 0 | 0 |  | Finished circular assembly                  |  |
| NCTC10928 | <i>Neisseria gonorrhoeae</i> | 50  | 1 | 1 | 1 |  | Finished assembly (lacking circularisation) |  |
| NCTC10931 | <i>Neisseria gonorrhoeae</i> | 133 | 0 | 0 | 4 |                                                                                      | Finished assembly with multiple traversals  |                                                                                       |

|           |                         |    |   |   |   |                                                                                      |                                             |                                                                                       |
|-----------|-------------------------|----|---|---|---|--------------------------------------------------------------------------------------|---------------------------------------------|---------------------------------------------------------------------------------------|
|           |                         |    |   |   |   | 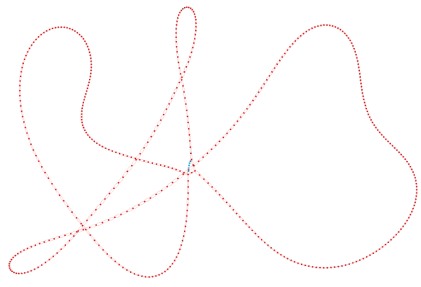    |                                             |     |
| NCTC10957 | <i>Escherichia coli</i> | 58 | 1 | 2 | 0 |    | Finished circular assembly                  |    |
| NCTC10958 | <i>Escherichia coli</i> | 60 | 1 | 1 | 0 |   | Finished assembly with multiple traversals  |   |
| NCTC10959 | <i>Escherichia coli</i> | 42 | 0 | 0 | 6 |  | Mis-assembly                                |  |
| NCTC10960 | <i>Escherichia coli</i> | 63 | 0 | 0 | 5 |  | Finished assembly (lacking circularisation) |  |
| NCTC10961 | <i>Escherichia coli</i> | 60 | 0 | 0 | 3 |  | Finished circular assembly                  |  |
| NCTC10962 | <i>Escherichia coli</i> | 42 | 1 | 2 | 0 |                                                                                      | Finished circular assembly                  |                                                                                       |

|           |                               |     |         |         |         |                                                                                      |                                            |                                                                                       |
|-----------|-------------------------------|-----|---------|---------|---------|--------------------------------------------------------------------------------------|--------------------------------------------|---------------------------------------------------------------------------------------|
|           |                               |     |         |         |         | 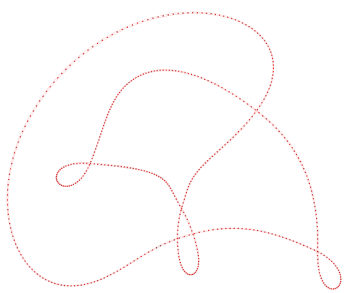   |                                            |     |
| NCTC10965 | <i>Shimwellia blattae</i>     | 58  | 1       | 0       | 0       |    | Finished circular assembly                 |    |
| NCTC10973 | <i>Escherichia coli</i>       | 79  | 1       | 0       | 0       |   | Finished circular assembly                 |  |
| NCTC10974 | <i>Escherichia coli</i>       | 30  | 1       | 0       | 1       |  | Mis-assembly/Fragmented                    |  |
| NCTC10975 | <i>Proteus mirabilis</i>      | 39  | Pending | Pending | Pending |  | Finished assembly with multiple traversals |  |
| NCTC10988 | <i>Staphylococcus aureus</i>  | 87  | 0       | 0       | 13      |  | Mis-assembly                               |  |
| NCTC10999 | <i>Streptococcus porcinus</i> | 120 | Pending | Pending | Pending |                                                                                      | Finished circular assembly                 |                                                                                       |



|           |                                    |     |         |         |         |  |                            |  |
|-----------|------------------------------------|-----|---------|---------|---------|--|----------------------------|--|
|           |                                    |     |         |         |         |  |                            |  |
| NCTC11022 | <i>Escherichia coli</i>            | 42  | 0       | 0       | 3       |  | Finished circular assembly |  |
| NCTC11023 | <i>Escherichia coli</i>            | 82  | 1       | 0       | 0       |  | Finished circular assembly |  |
| NCTC11030 | <i>Sphingomonas paucimobilis</i>   | 32  | Pending | Pending | Pending |  | Mis-assembly/Fragmented    |  |
| NCTC11042 | <i>Staphylococcus haemolyticus</i> | 114 | 1       | 0       | 2       |  | Finished circular assembly |  |
| NCTC11043 | <i>Staphylococcus xylosum</i>      | 96  | Pending | Pending | Pending |  | Finished circular assembly |  |
| NCTC11044 | <i>Staphylococcus warneri</i>      | 57  | 1       | 0       | 0       |  | Finished circular assembly |  |

|           |                                   |     |         |         |         |                                                                                      |                                             |                                                                                       |
|-----------|-----------------------------------|-----|---------|---------|---------|--------------------------------------------------------------------------------------|---------------------------------------------|---------------------------------------------------------------------------------------|
|           |                                   |     |         |         |         | 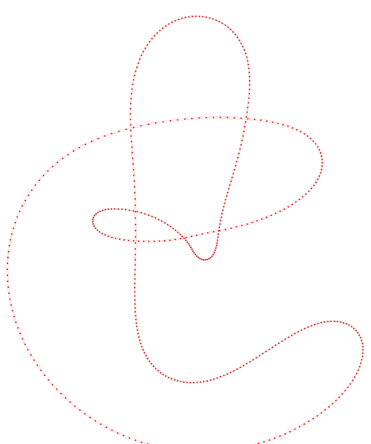    |                                             |     |
| NCTC11045 | <i>Staphylococcus capitis</i>     | 81  | Pending | Pending | Pending |    | Finished circular assembly                  |    |
| NCTC11046 | <i>Staphylococcus simulans</i>    | 161 | Pending | Pending | Pending |  | Finished circular assembly                  |   |
| NCTC11047 | <i>Staphylococcus epidermidis</i> | 63  | 1       | 0       | 4       |  | Finished assembly (lacking circularisation) |  |
| NCTC11048 | <i>Staphylococcus intermedius</i> | 79  | Pending | Pending | Pending |  | Finished circular assembly                  |  |
| NCTC11063 | <i>Streptococcus milleri</i>      | 187 | Pending | Pending | Pending |  | Finished circular assembly                  |  |
| NCTC11064 | <i>Streptococcus milleri</i>      | 168 | Pending | Pending | Pending |                                                                                      | Finished circular assembly                  |                                                                                       |

|           |                                 |    |         |         |         |                                                                                      |                                             |                                                                                       |
|-----------|---------------------------------|----|---------|---------|---------|--------------------------------------------------------------------------------------|---------------------------------------------|---------------------------------------------------------------------------------------|
|           |                                 |    |         |         |         | 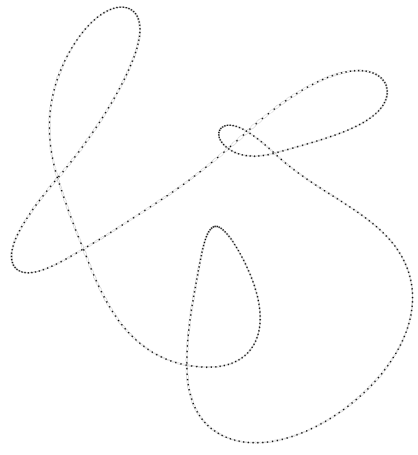    |                                             |     |
| NCTC11067 | <i>Vibrio vulnificus</i>        | 55 | 2       | 0       | 1       |    | Finished circular assembly                  |    |
| NCTC11074 | <i>Citrobacter koseri</i>       | 71 | 1       | 0       | 2       |   | Finished circular assembly                  |  |
| NCTC11075 | <i>Citrobacter koseri</i>       | 30 | 0       | 0       | 1       |  | Finished assembly (lacking circularisation) |  |
| NCTC11076 | <i>Citrobacter koseri</i>       | 64 | 0       | 0       | 2       |  | Finished circular assembly                  |  |
| NCTC11077 | <i>Citrobacter koseri</i>       | 73 | 0       | 0       | 2       |  | Finished circular assembly                  |  |
| NCTC11079 | <i>Streptococcus agalactiae</i> | 81 | Pending | Pending | Pending |                                                                                      | Finished circular assembly                  |                                                                                       |

|           |                                    |    |         |         |         |  |                                             |  |
|-----------|------------------------------------|----|---------|---------|---------|--|---------------------------------------------|--|
|           |                                    |    |         |         |         |  |                                             |  |
| NCTC11080 | <i>Streptococcus agalactiae</i>    | 44 | Pending | Pending | Pending |  | Finished circular assembly                  |  |
| NCTC11085 | <i>Streptococcus sanguinis</i>     | 88 | Pending | Pending | Pending |  | Finished circular assembly                  |  |
| NCTC11086 | <i>Streptococcus sanguinis</i>     | 34 | Pending | Pending | Pending |  | Finished assembly (lacking circularisation) |  |
| NCTC11096 | <i>Aggregatibacter aphrophilus</i> | 93 | 1       | 0       | 0       |  | Mis-assembly                                |  |
| NCTC11100 | <i>Escherichia coli</i>            | 59 | 1       | 0       | 1       |  | Finished circular assembly                  |  |
| NCTC11101 | <i>Escherichia coli</i>            | 81 | 1       | 1       | 0       |  | Finished circular assembly                  |  |

|           |                         |    |         |         |         |                                                                                      |                                             |                                                                                       |
|-----------|-------------------------|----|---------|---------|---------|--------------------------------------------------------------------------------------|---------------------------------------------|---------------------------------------------------------------------------------------|
|           |                         |    |         |         |         | 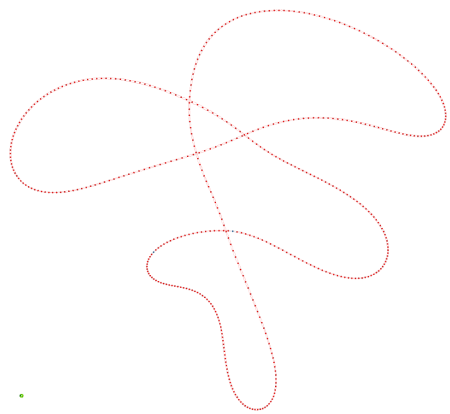    |                                             |     |
| NCTC11102 | <i>Escherichia coli</i> | 73 | 1       | 1       | 0       |    | Finished circular assembly                  |    |
| NCTC11103 | <i>Escherichia coli</i> | 48 | 1       | 2       | 0       |  | Finished circular assembly                  |   |
| NCTC11104 | <i>Escherichia coli</i> | 45 | Pending | Pending | Pending |  | Finished circular assembly                  |  |
| NCTC11105 | <i>Escherichia coli</i> | 49 | 0       | 0       | 1       |  | Finished assembly (lacking circularisation) |  |
| NCTC11106 | <i>Escherichia coli</i> | 52 | 1       | 0       | 4       |  | Finished circular assembly                  |  |
| NCTC11107 | <i>Escherichia coli</i> | 34 | 0       | 0       | 3       |                                                                                      | Mis-assembly/Fragmented                     |                                                                                       |

|           |                         |    |   |   |   |                                                                                      |                                             |                                                                                       |
|-----------|-------------------------|----|---|---|---|--------------------------------------------------------------------------------------|---------------------------------------------|---------------------------------------------------------------------------------------|
|           |                         |    |   |   |   | 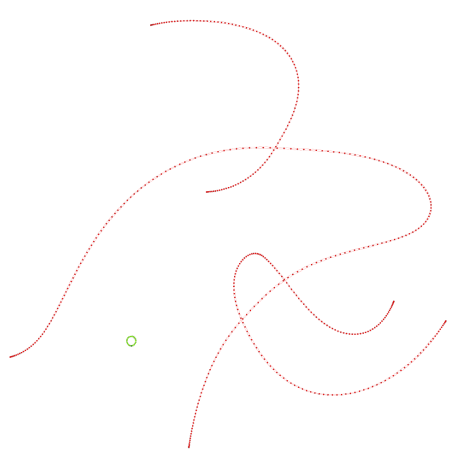    |                                             |     |
| NCTC11108 | <i>Escherichia coli</i> | 77 | 1 | 1 | 0 |    | Finished circular assembly                  |    |
| NCTC11109 | <i>Escherichia coli</i> | 72 | 1 | 0 | 1 |   | Finished circular assembly                  |   |
| NCTC11111 | <i>Escherichia coli</i> | 58 | 1 | 2 | 0 |  | Finished circular assembly                  |  |
| NCTC11112 | <i>Escherichia coli</i> | 0  | 0 | 0 | 2 |  | Mis-assembly/Fragmented                     |  |
| NCTC11113 | <i>Escherichia coli</i> | 55 | 1 | 0 | 0 |  | Finished circular assembly                  |  |
| NCTC11114 | <i>Escherichia coli</i> | 71 | 1 | 1 | 4 |                                                                                      | Finished assembly (lacking circularisation) |                                                                                       |

|           |                         |    |   |   |   |                                                                                      |                            |                                                                                       |
|-----------|-------------------------|----|---|---|---|--------------------------------------------------------------------------------------|----------------------------|---------------------------------------------------------------------------------------|
|           |                         |    |   |   |   | 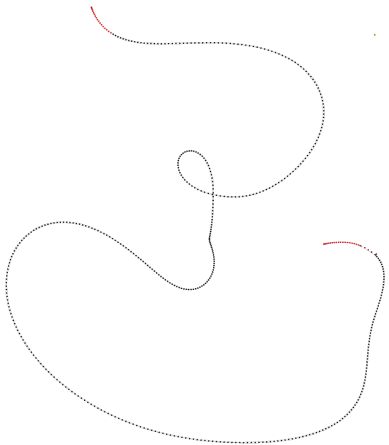    |                            |     |
| NCTC11115 | <i>Escherichia coli</i> | 42 | 1 | 0 | 1 |    | Finished circular assembly |    |
| NCTC11116 | <i>Escherichia coli</i> | 56 | 0 | 0 | 4 |   | Finished circular assembly |  |
| NCTC11117 | <i>Escherichia coli</i> | 46 | 1 | 0 | 1 |  | Finished circular assembly |  |
| NCTC11118 | <i>Escherichia coli</i> | 59 | 1 | 1 | 0 |  | Finished circular assembly |  |
| NCTC11119 | <i>Escherichia coli</i> | 61 | 1 | 1 | 3 |  | Finished circular assembly |  |
| NCTC11120 | <i>Escherichia coli</i> | 35 | 1 | 3 | 5 |                                                                                      | Finished circular assembly |                                                                                       |

|           |                         |    |   |   |    |  |                                             |  |
|-----------|-------------------------|----|---|---|----|--|---------------------------------------------|--|
|           |                         |    |   |   |    |  |                                             |  |
| NCTC11121 | <i>Escherichia coli</i> | 53 | 1 | 0 | 1  |  | Mis-assembly/Fragmented                     |  |
| NCTC11122 | <i>Escherichia coli</i> | 80 | 1 | 0 | 1  |  | Finished circular assembly                  |  |
| NCTC11123 | <i>Escherichia coli</i> | 83 | 0 | 0 | 10 |  | Finished circular assembly                  |  |
| NCTC11124 | <i>Escherichia coli</i> | 39 | 1 | 1 | 0  |  | Finished assembly (lacking circularisation) |  |
| NCTC11125 | <i>Escherichia coli</i> | 64 | 1 | 0 | 2  |  | Mis-assembly/Fragmented                     |  |
| NCTC11126 | <i>Escherichia coli</i> | 50 | 2 | 0 | 0  |  | Finished assembly (lacking circularisation) |  |



|           |                         |    |   |   |   |                                                                                      |                            |                                                                                       |
|-----------|-------------------------|----|---|---|---|--------------------------------------------------------------------------------------|----------------------------|---------------------------------------------------------------------------------------|
|           |                         |    |   |   |   | 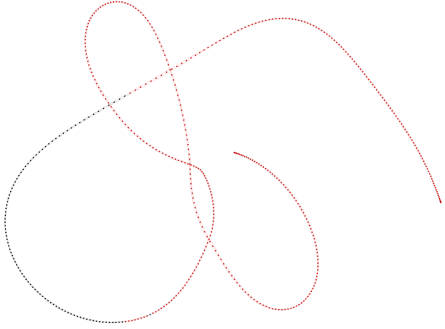   |                            |     |
| NCTC11127 | <i>Escherichia coli</i> | 64 | 0 | 0 | 4 |    | Mis-assembly/Fragmented    |    |
| NCTC11128 | <i>Escherichia coli</i> | 63 | 1 | 1 | 2 |  | Finished circular assembly |   |
| NCTC11129 | <i>Escherichia coli</i> | 70 | 1 | 0 | 0 |  | Finished circular assembly |  |
| NCTC11130 | <i>Escherichia coli</i> | 87 | 0 | 0 | 2 |  | Finished circular assembly |  |
| NCTC11131 | <i>Escherichia coli</i> | 63 | 1 | 0 | 2 |  | Finished circular assembly |  |
| NCTC11132 | <i>Escherichia coli</i> | 65 | 0 | 0 | 4 |                                                                                      | Mis-assembly/Fragmented    |                                                                                       |

|           |                               |     |         |         |         |                                                                                      |                                             |                                                                                       |
|-----------|-------------------------------|-----|---------|---------|---------|--------------------------------------------------------------------------------------|---------------------------------------------|---------------------------------------------------------------------------------------|
|           |                               |     |         |         |         | 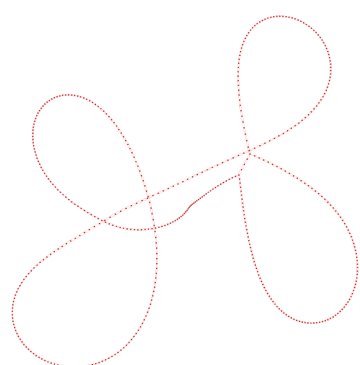    |                                             |     |
| NCTC11134 | <i>Nocardia farcinica</i>     | 52  | 3       | 2       | 0       |    | Finished circular assembly                  |    |
| NCTC11150 | <i>Staphylococcus aureus</i>  | 31  | 1       | 1       | 1       |  | Finished circular assembly                  |   |
| NCTC11151 | <i>Escherichia coli</i>       | 72  | 1       | 0       | 0       |  | Finished circular assembly                  |  |
| NCTC11169 | <i>Streptococcus milleri</i>  | 100 | Pending | Pending | Pending |  | Finished circular assembly                  |  |
| NCTC11186 | <i>Escherichia coli</i>       | 85  | 1       | 1       | 3       |  | Finished circular assembly                  |  |
| NCTC11189 | <i>Streptococcus viridans</i> | 79  | 0       | 0       | 4       |                                                                                      | Finished assembly (lacking circularisation) |                                                                                       |

|           |                                 |    |         |         |         |  |                                             |  |
|-----------|---------------------------------|----|---------|---------|---------|--|---------------------------------------------|--|
|           |                                 |    |         |         |         |  |                                             |  |
| NCTC11192 | <i>Legionella pneumophila</i>   | 38 | 1       | 0       | 1       |  | Finished assembly (lacking circularisation) |  |
| NCTC11214 | <i>Serratia odorifera</i>       | 37 | 1       | 0       | 0       |  | Finished assembly (lacking circularisation) |  |
| NCTC11228 | <i>Klebsiella pneumoniae</i>    | 76 | 0       | 0       | 4       |  | Finished circular assembly                  |  |
| NCTC11242 | <i>Streptococcus agalactiae</i> | 10 | Pending | Pending | Pending |  | Finished assembly (lacking circularisation) |  |
| NCTC11320 | <i>Staphylococcus hominis</i>   | 90 | 0       | 1       | 1       |  | Finished circular assembly                  |  |
| NCTC11327 | <i>Vibrio fluvialis</i>         | 83 | 1       | 1       | 0       |  | Finished circular assembly                  |  |

|           |                                    |    |         |         |         |                                                                                      |                                             |                                                                                       |
|-----------|------------------------------------|----|---------|---------|---------|--------------------------------------------------------------------------------------|---------------------------------------------|---------------------------------------------------------------------------------------|
|           |                                    |    |         |         |         | 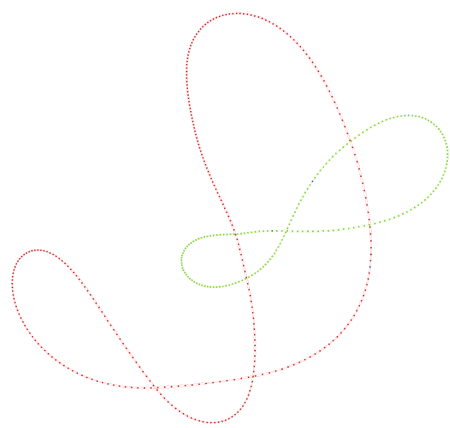    |                                             |     |
| NCTC11341 | <i>Escherichia coli</i>            | 40 | 0       | 0       | 4       |    | Finished circular assembly                  |    |
| NCTC11343 | <i>Sphingobacterium multivorum</i> | 22 | Pending | Pending | Pending |   | Mis-assembly/Fragmented                     |   |
| NCTC11351 | <i>Campylobacter jejuni</i>        | 61 | 1       | 0       | 0       |  | Finished circular assembly                  |  |
| NCTC11352 | <i>Campylobacter lari</i>          | 30 | Pending | Pending | Pending |  | Finished assembly (lacking circularisation) |  |
| NCTC11355 | <i>Klebsiella sp</i>               | 42 | 0       | 0       | 1       |  | Finished circular assembly                  |  |
| NCTC11356 | <i>Klebsiella sp</i>               | 70 | 1       | 0       | 0       |                                                                                      | Finished assembly (lacking circularisation) |                                                                                       |

|           |                                        |     |         |         |         |                                                                                       |                                                |                                                                                       |
|-----------|----------------------------------------|-----|---------|---------|---------|---------------------------------------------------------------------------------------|------------------------------------------------|---------------------------------------------------------------------------------------|
|           |                                        |     |         |         |         | 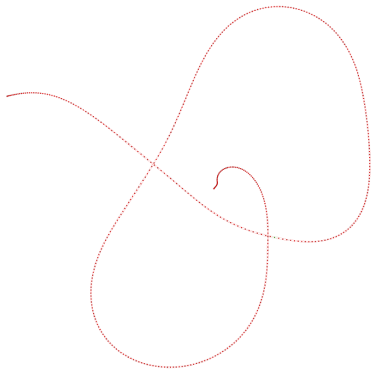    |                                                |     |
| NCTC11357 | <i>Klebsiella sp</i>                   | 77  | 1       | 0       | 0       |     | Finished assembly<br>(lacking circularisation) |    |
| NCTC11358 | <i>Klebsiella sp</i>                   | 45  | 1       | 1       | 1       |   | Finished circular assembly                     |   |
| NCTC11359 | <i>Klebsiella sp</i>                   | 61  | 1       | 0       | 0       |   | Finished circular assembly                     |  |
| NCTC11360 | <i>Streptococcus agalactiae</i>        | 3   | Pending | Pending | Pending |   | Mis-assembly/Fragmented                        |  |
| NCTC11366 | <i>Campylobacter coli</i>              | 135 | Pending | Pending | Pending |  | Finished circular assembly                     |  |
| NCTC11383 | <i>Actinobacillus pleuropneumoniae</i> | 6   | Pending | Pending | Pending |                                                                                       | Mis-assembly/Fragmented                        |                                                                                       |

|           |                                        |    |         |         |         |                                                                                      |                                             |                                                                                       |
|-----------|----------------------------------------|----|---------|---------|---------|--------------------------------------------------------------------------------------|---------------------------------------------|---------------------------------------------------------------------------------------|
|           |                                        |    |         |         |         | 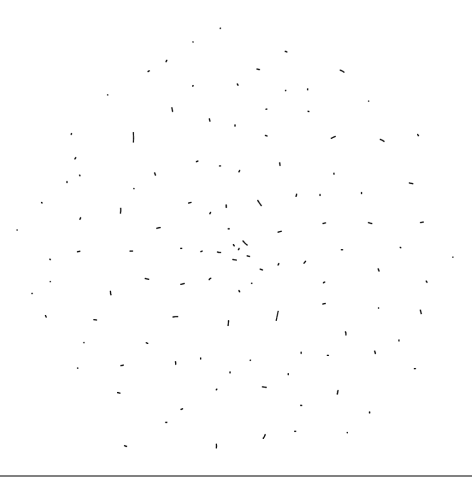    |                                             |     |
| NCTC11384 | <i>Actinobacillus pleuropneumoniae</i> | 69 | Pending | Pending | Pending |    | Finished circular assembly                  |    |
| NCTC11388 | <i>Sphingobacterium spiritivorum</i>   | 39 | 0       | 0       | 2       |   | Finished assembly (lacking circularisation) |   |
| NCTC11394 | <i>Haemophilus influenzae</i>          | 85 | 1       | 0       | 0       |  | Finished circular assembly                  |  |
| NCTC11397 | <i>Corynebacterium diphtheriae</i>     | 59 | 1       | 0       | 0       |  | Finished circular assembly                  |  |
| NCTC11407 | <i>Actinobacillus pleuropneumoniae</i> | 97 | Pending | Pending | Pending |  | Finished circular assembly                  |  |
| NCTC11429 | <i>Sphingobacterium thalpophilum</i>   | 0  | Pending | Pending | Pending |                                                                                      | Mis-assembly/Fragmented                     |                                                                                       |

|           |                                |     |         |         |         |                                                                                      |                                             |                                                                                       |
|-----------|--------------------------------|-----|---------|---------|---------|--------------------------------------------------------------------------------------|---------------------------------------------|---------------------------------------------------------------------------------------|
|           |                                |     |         |         |         |                                                                                      |                                             |                                                                                       |
| NCTC11432 | <i>Chryseobacterium gleum</i>  | 41  | Pending | Pending | Pending | 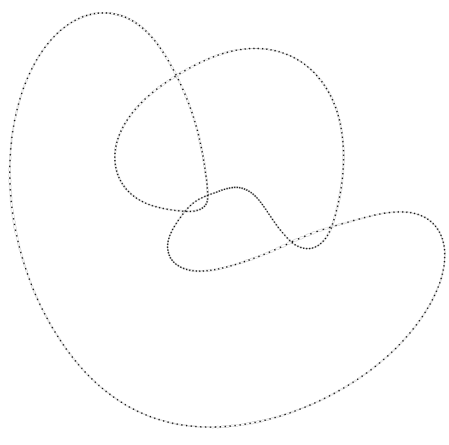   | Finished circular assembly                  |    |
| NCTC11434 | <i>Pluralibacter gergoviae</i> | 46  | 1       | 1       | 2       |   | Finished circular assembly                  |   |
| NCTC11435 | <i>Vibrio mimicus</i>          | 60  | Pending | Pending | Pending |  | Mis-assembly                                |  |
| NCTC11436 | <i>Streptococcus equinus</i>   | 137 | 0       | 0       | 2       |  | Finished circular assembly                  |  |
| NCTC11437 | <i>Campylobacter coli</i>      | 226 | 1       | 1       | 0       |  | Finished circular assembly                  |  |
| NCTC11440 | <i>Pseudomonas aeruginosa</i>  | 44  | 0       | 0       | 4       |                                                                                      | Finished assembly (lacking circularisation) |                                                                                       |

|           |                               |    |   |   |   |                                                                                       |                                             |                                                                                       |
|-----------|-------------------------------|----|---|---|---|---------------------------------------------------------------------------------------|---------------------------------------------|---------------------------------------------------------------------------------------|
|           |                               |    |   |   |   | 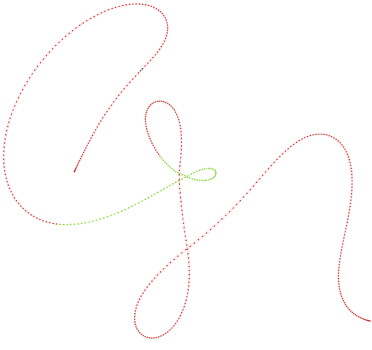    |                                             |     |
| NCTC11466 | <i>Cedecea lapagei</i>        | 64 | 1 | 0 | 0 |     | Finished circular assembly                  |    |
| NCTC11467 | <i>Cronobacter sakazakii</i>  | 48 | 4 | 3 | 0 |  | Finished circular assembly                  |   |
| NCTC11468 | <i>Tatumella pyseos</i>       | 78 | 1 | 0 | 0 |   | Finished assembly (lacking circularisation) |  |
| NCTC11469 | <i>Yersinia intermedia</i>    | 44 | 1 | 0 | 0 |   | Finished circular assembly                  |  |
| NCTC11470 | <i>Yersinia frederiksenii</i> | 45 | 1 | 0 | 0 |   | Finished circular assembly                  |  |
| NCTC11471 | <i>Yersinia kristensenii</i>  | 73 | 1 | 0 | 0 |                                                                                       | Finished circular assembly                  |                                                                                       |



|           |                               |    |         |         |         |                                                                                      |                            |                                                                                       |
|-----------|-------------------------------|----|---------|---------|---------|--------------------------------------------------------------------------------------|----------------------------|---------------------------------------------------------------------------------------|
|           |                               |    |         |         |         | 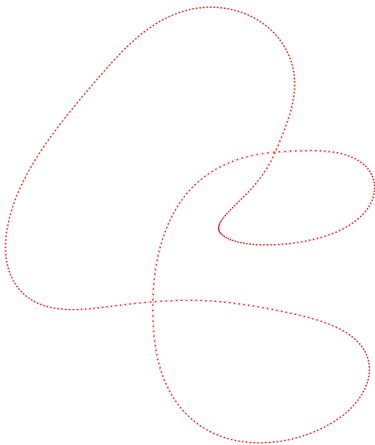    |                            |     |
| NCTC11472 | <i>Escherichia coli</i>       | 56 | 1       | 1       | 2       |   | Finished circular assembly |    |
| NCTC11473 | <i>Escherichia coli</i>       | 0  | 1       | 1       | 1       |   | Mis-assembly/Fragmented    |   |
| NCTC11474 | <i>Escherichia coli</i>       | 73 | 1       | 0       | 3       |  | Mis-assembly/Fragmented    |  |
| NCTC11475 | <i>Escherichia coli</i>       | 62 | 1       | 0       | 3       |  | Finished circular assembly |  |
| NCTC11476 | <i>Escherichia coli</i>       | 82 | 1       | 0       | 0       |  | Finished circular assembly |  |
| NCTC11477 | <i>Legionella longbeachae</i> | 96 | Pending | Pending | Pending |                                                                                      | Finished circular assembly |                                                                                       |

|           |                                |     |         |         |         |                                                                                       |                            |                                                                                       |
|-----------|--------------------------------|-----|---------|---------|---------|---------------------------------------------------------------------------------------|----------------------------|---------------------------------------------------------------------------------------|
|           |                                |     |         |         |         | 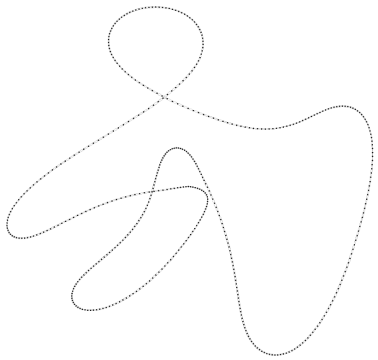    |                            |     |
| NCTC11531 | <i>Legionella oakridgensis</i> | 75  | Pending | Pending | Pending |     | Finished circular assembly |    |
| NCTC11532 | <i>Legionella wadsworthii</i>  | 64  | Pending | Pending | Pending |    | Finished circular assembly |   |
| NCTC11543 | <i>Serratia grimesii</i>       | 63  | 1       | 0       | 0       |   | Finished circular assembly |  |
| NCTC11544 | <i>Serratia quinivorans</i>    | 38  | 0       | 0       | 3       |   | Finished circular assembly |  |
| NCTC11561 | <i>Staphylococcus aureus</i>   | 57  | 1       | 1       | 1       |  | Finished circular assembly |  |
| NCTC11567 | <i>Streptococcus sp.</i>       | 217 | Pending | Pending | Pending |                                                                                       | Finished circular assembly |                                                                                       |

|           |                             |     |         |         |         |                                                                                      |                            |                                                                                       |
|-----------|-----------------------------|-----|---------|---------|---------|--------------------------------------------------------------------------------------|----------------------------|---------------------------------------------------------------------------------------|
|           |                             |     |         |         |         | 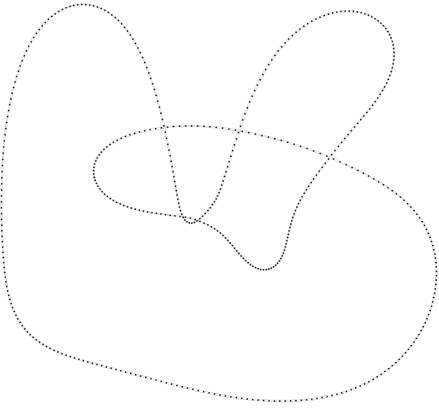   |                            |    |
| NCTC11571 | <i>Enterobacter cloacae</i> | 77  | 1       | 0       | 0       |    | Finished circular assembly |    |
| NCTC11579 | <i>Enterobacter cloacae</i> | 76  | 1       | 0       | 1       |  | Mis-assembly               |   |
| NCTC11588 | <i>Enterobacter cloacae</i> | 72  | 1       | 0       | 1       |  | Finished circular assembly |  |
| NCTC11606 | <i>Streptococcus equi</i>   | 68  | Pending | Pending | Pending |  | Finished circular assembly |  |
| NCTC11607 | <i>Aggregatibacter sp.</i>  | 102 | 1       | 0       | 1       |  | Finished circular assembly |  |
| NCTC11637 | <i>Helicobacter pylori</i>  | 126 | 1       | 0       | 0       |                                                                                      | Finished circular assembly |                                                                                       |

|           |                                |    |         |         |         |                                                                                      |                                             |                                                                                       |
|-----------|--------------------------------|----|---------|---------|---------|--------------------------------------------------------------------------------------|---------------------------------------------|---------------------------------------------------------------------------------------|
|           |                                |    |         |         |         | 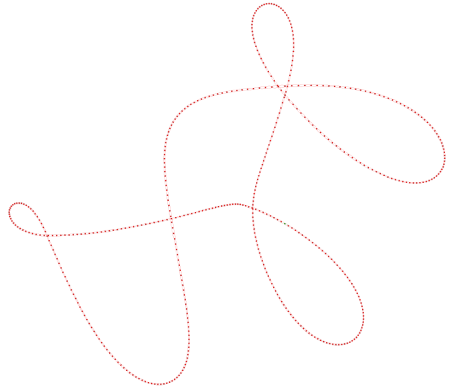   |                                             |     |
| NCTC11667 | <i>Providencia rustigianii</i> | 58 | Pending | Pending | Pending |    | Finished assembly (lacking circularisation) |    |
| NCTC11674 | <i>Klebsiella sp</i>           | 54 | 1       | 1       | 1       |  | Finished circular assembly                  |   |
| NCTC11675 | <i>Klebsiella sp.</i>          | 40 | 1       | 1       | 1       |  | Finished assembly (lacking circularisation) |  |
| NCTC11676 | <i>Klebsiella sp</i>           | 56 | 0       | 0       | 2       |  | Finished circular assembly                  |  |
| NCTC11678 | <i>Klebsiella sp</i>           | 57 | 1       | 1       | 2       |  | Finished circular assembly                  |  |
| NCTC11679 | <i>Klebsiella sp.</i>          | 46 | 1       | 0       | 6       |                                                                                      | Finished circular assembly                  |                                                                                       |

|           |                           |    |         |         |         |  |                                             |  |
|-----------|---------------------------|----|---------|---------|---------|--|---------------------------------------------|--|
|           |                           |    |         |         |         |  |                                             |  |
| NCTC11680 | <i>Klebsiella sp.</i>     | 50 | 0       | 0       | 3       |  | Finished circular assembly                  |  |
| NCTC11681 | <i>Klebsiella sp.</i>     | 41 | Pending | Pending | Pending |  | Finished assembly (lacking circularisation) |  |
| NCTC11682 | <i>Klebsiella sp.</i>     | 39 | 1       | 1       | 3       |  | Finished assembly (lacking circularisation) |  |
| NCTC11683 | <i>Klebsiella oxytoca</i> | 54 | 1       | 0       | 5       |  | Mis-assembly/Fragmented                     |  |
| NCTC11684 | <i>Klebsiella sp.</i>     | 35 | 0       | 0       | 5       |  | Finished assembly (lacking circularisation) |  |
| NCTC11685 | <i>Klebsiella sp.</i>     | 28 | 0       | 0       | 8       |  | Mis-assembly/Fragmented                     |  |

|           |                           |    |         |         |         |  |                            |  |
|-----------|---------------------------|----|---------|---------|---------|--|----------------------------|--|
|           |                           |    |         |         |         |  |                            |  |
| NCTC11686 | <i>Klebsiella oxytoca</i> | 52 | 0       | 0       | 4       |  | Mis-assembly/Fragmented    |  |
| NCTC11687 | <i>Klebsiella sp</i>      | 41 | 0       | 0       | 4       |  | Finished circular assembly |  |
| NCTC11688 | <i>Klebsiella sp</i>      | 49 | 0       | 0       | 9       |  | Finished circular assembly |  |
| NCTC11689 | <i>Klebsiella sp.</i>     | 54 | 0       | 0       | 13      |  | Mis-assembly/Fragmented    |  |
| NCTC11691 | <i>Klebsiella oxytoca</i> | 50 | Pending | Pending | Pending |  | Finished circular assembly |  |
| NCTC11692 | <i>Klebsiella sp</i>      | 34 | 0       | 0       | 12      |  | Finished circular assembly |  |

|           |                                                |    |   |   |   |  |                            |  |
|-----------|------------------------------------------------|----|---|---|---|--|----------------------------|--|
|           |                                                |    |   |   |   |  |                            |  |
| NCTC11693 | <i>Klebsiella sp</i>                           | 31 | 0 | 0 | 9 |  | Mis-assembly/Fragmented    |  |
| NCTC11694 | <i>Klebsiella oxytoca</i>                      | 34 | 0 | 0 | 7 |  | Mis-assembly/Fragmented    |  |
| NCTC11695 | <i>Klebsiella pneumoniae subsp. pneumoniae</i> | 49 | 1 | 1 | 0 |  | Finished circular assembly |  |
| NCTC11696 | <i>Klebsiella oxytoca</i>                      | 73 | 1 | 2 | 1 |  | Finished circular assembly |  |
| NCTC11697 | <i>Klebsiella sp</i>                           | 30 | 0 | 0 | 4 |  | Finished circular assembly |  |
| NCTC11698 | <i>Klebsiella sp.</i>                          | 24 | 1 | 0 | 0 |  | Mis-assembly/Fragmented    |  |

|           |                                                |     |   |   |    |  |                            |  |
|-----------|------------------------------------------------|-----|---|---|----|--|----------------------------|--|
|           |                                                |     |   |   |    |  |                            |  |
| NCTC11800 | <i>Providencia stuartii</i>                    | 32  | 0 | 0 | 4  |  | Mis-assembly               |  |
| NCTC11801 | <i>Providencia rettgeri</i>                    | 57  | 0 | 0 | 5  |  | Finished circular assembly |  |
| NCTC11802 | <i>Providencia rustigianii</i>                 | 39  | 1 | 2 | 0  |  | Finished circular assembly |  |
| NCTC11854 | <i>Streptococcus equi subsp. zooepidemicus</i> | 122 | 0 | 0 | 1  |  | Finished circular assembly |  |
| NCTC11872 | <i>Haemophilus influenzae</i>                  | 27  | 0 | 0 | 11 |  | Mis-assembly/Fragmented    |  |
| NCTC11881 | <i>Salmonella sp</i>                           | 40  | 1 | 1 | 1  |  | Mis-assembly/Fragmented    |  |



|           |                                 |     |         |         |         |                                                                                      |                                             |                                                                                       |
|-----------|---------------------------------|-----|---------|---------|---------|--------------------------------------------------------------------------------------|---------------------------------------------|---------------------------------------------------------------------------------------|
|           |                                 |     |         |         |         | 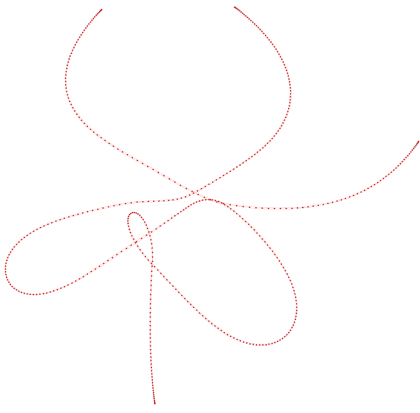    |                                             |     |
| NCTC11925 | <i>Campylobacter jejuni</i>     | 167 | 0       | 0       | 1       |    | Finished circular assembly                  |    |
| NCTC11930 | <i>Streptococcus agalactiae</i> | 179 | Pending | Pending | Pending |   | Finished circular assembly                  |   |
| NCTC11938 | <i>Proteus mirabilis</i>        | 46  | 0       | 0       | 1       |  | Finished assembly (lacking circularisation) |  |
| NCTC11939 | <i>Staphylococcus aureus</i>    | 73  | 0       | 0       | 7       |  | Finished circular assembly                  |  |
| NCTC11940 | <i>Staphylococcus aureus</i>    | 79  | Pending | Pending | Pending |  | Finished circular assembly                  |  |
| NCTC11962 | <i>Staphylococcus aureus</i>    | 71  | 0       | 0       | 4       |                                                                                      | Finished assembly with multiple traversals  |  |

|           |                                   |     |   |   |   |                                                                                      |                            |                                                                                       |
|-----------|-----------------------------------|-----|---|---|---|--------------------------------------------------------------------------------------|----------------------------|---------------------------------------------------------------------------------------|
|           |                                   |     |   |   |   | 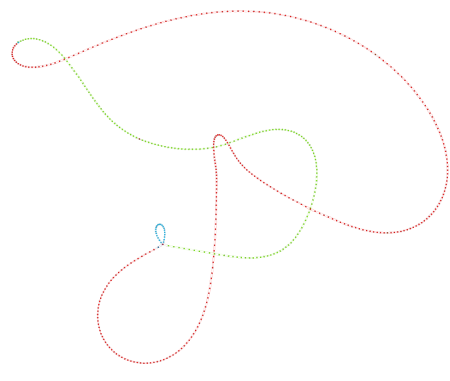   |                            |     |
| NCTC11963 | <i>Staphylococcus aureus</i>      | 108 | 1 | 0 | 8 |    | Finished circular assembly |    |
| NCTC11964 | <i>Staphylococcus epidermidis</i> | 158 | 1 | 1 | 3 |   | Finished circular assembly |   |
| NCTC11965 | <i>Staphylococcus aureus</i>      | 96  | 1 | 0 | 0 |  | Finished circular assembly |  |
| NCTC11976 | <i>Legionella cherrii</i>         | 37  | 0 | 0 | 1 |  | Finished circular assembly |  |
| NCTC11978 | <i>Legionella feeleii</i>         | 58  | 1 | 1 | 0 |  | Finished circular assembly |  |
| NCTC11979 | <i>Legionella hackeliae</i>       | 44  | 1 | 1 | 0 |                                                                                      | Finished circular assembly |                                                                                       |

|           |                                                                |     |   |   |   |                                                                                      |                                            |                                                                                       |
|-----------|----------------------------------------------------------------|-----|---|---|---|--------------------------------------------------------------------------------------|--------------------------------------------|---------------------------------------------------------------------------------------|
|           |                                                                |     |   |   |   | 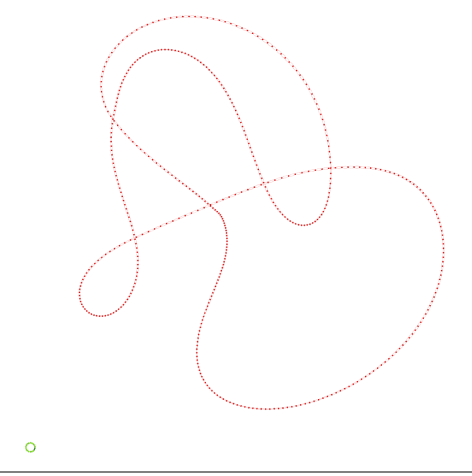    |                                            |     |
| NCTC12007 | <i>Legionella pneumophila</i>                                  | 52  | 1 | 0 | 1 |    | Finished circular assembly                 |    |
| NCTC12012 | <i>Vibrio cincinnatiensis</i>                                  | 48  | 2 | 0 | 1 |   | Finished circular assembly                 |   |
| NCTC12023 | <i>Salmonella enterica subsp. enterica serovar Typhimurium</i> | 44  | 0 | 0 | 2 |  | Finished assembly with multiple traversals |  |
| NCTC12026 | <i>Providencia rustigianii</i>                                 | 133 | 1 | 1 | 2 |  | Finished circular assembly                 |  |
| NCTC12028 | <i>Morganella morganii</i>                                     | 80  | 1 | 0 | 0 |  | Finished circular assembly                 |  |
| NCTC12035 | <i>Staphylococcus aureus</i>                                   | 42  | 1 | 1 | 0 |                                                                                      | Finished circular assembly                 |                                                                                       |

|           |                               |     |   |   |   |                                                                                      |                            |                                                                                       |
|-----------|-------------------------------|-----|---|---|---|--------------------------------------------------------------------------------------|----------------------------|---------------------------------------------------------------------------------------|
|           |                               |     |   |   |   | 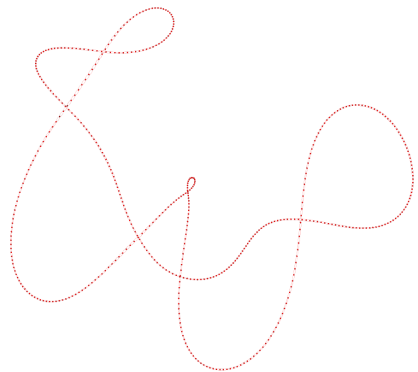   |                            |     |
| NCTC12045 | <i>Streptococcus pyogenes</i> | 118 | 1 | 0 | 0 |    | Finished circular assembly |    |
| NCTC12046 | <i>Streptococcus pyogenes</i> | 167 | 1 | 0 | 0 |  | Finished circular assembly |  |
| NCTC12047 | <i>Streptococcus pyogenes</i> | 187 | 1 | 0 | 0 |  | Finished circular assembly |  |
| NCTC12048 | <i>Streptococcus pyogenes</i> | 144 | 1 | 0 | 0 |  | Finished circular assembly |  |
| NCTC12049 | <i>Streptococcus pyogenes</i> | 183 | 1 | 0 | 1 |  | Finished circular assembly |  |
| NCTC12050 | <i>Streptococcus pyogenes</i> | 200 | 1 | 0 | 0 |                                                                                      | Finished circular assembly |                                                                                       |

|           |                               |     |   |   |   |                                                                                      |                            |                                                                                       |
|-----------|-------------------------------|-----|---|---|---|--------------------------------------------------------------------------------------|----------------------------|---------------------------------------------------------------------------------------|
|           |                               |     |   |   |   | 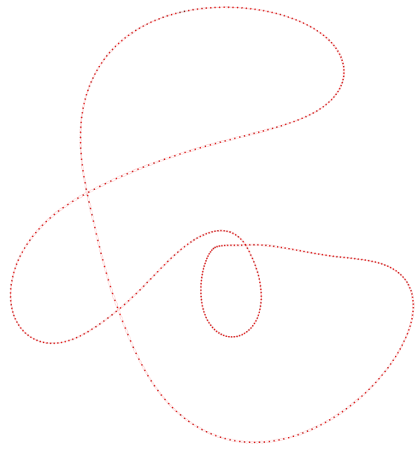    |                            |     |
| NCTC12051 | <i>Streptococcus pyogenes</i> | 76  | 1 | 0 | 1 |    | Finished circular assembly |    |
| NCTC12052 | <i>Streptococcus pyogenes</i> | 100 | 1 | 0 | 0 |   | Finished circular assembly |   |
| NCTC12054 | <i>Streptococcus pyogenes</i> | 134 | 1 | 0 | 1 |  | Finished circular assembly |  |
| NCTC12057 | <i>Streptococcus pyogenes</i> | 218 | 1 | 0 | 0 |  | Finished circular assembly |  |
| NCTC12058 | <i>Streptococcus pyogenes</i> | 173 | 1 | 0 | 0 |  | Finished circular assembly |  |
| NCTC12059 | <i>Streptococcus pyogenes</i> | 86  | 1 | 0 | 0 |                                                                                      | Finished circular assembly |                                                                                       |

|           |                               |     |   |   |   |                                                                                      |                            |                                                                                       |
|-----------|-------------------------------|-----|---|---|---|--------------------------------------------------------------------------------------|----------------------------|---------------------------------------------------------------------------------------|
|           |                               |     |   |   |   | 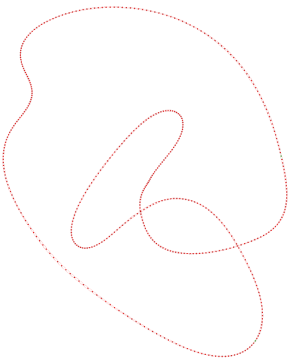   |                            |     |
| NCTC12060 | <i>Streptococcus pyogenes</i> | 60  | 0 | 0 | 1 |    | Finished circular assembly |    |
| NCTC12061 | <i>Streptococcus pyogenes</i> | 192 | 1 | 0 | 1 |   | Finished circular assembly |   |
| NCTC12062 | <i>Streptococcus pyogenes</i> | 161 | 1 | 0 | 0 |  | Finished circular assembly |  |
| NCTC12064 | <i>Streptococcus pyogenes</i> | 127 | 1 | 0 | 0 |  | Finished circular assembly |  |
| NCTC12065 | <i>Streptococcus pyogenes</i> | 203 | 1 | 0 | 1 |  | Finished circular assembly |  |
| NCTC12066 | <i>Streptococcus pyogenes</i> | 128 | 1 | 0 | 0 |                                                                                      | Finished circular assembly |                                                                                       |

|           |                               |     |         |         |         |                                                                                      |                            |                                                                                       |
|-----------|-------------------------------|-----|---------|---------|---------|--------------------------------------------------------------------------------------|----------------------------|---------------------------------------------------------------------------------------|
|           |                               |     |         |         |         | 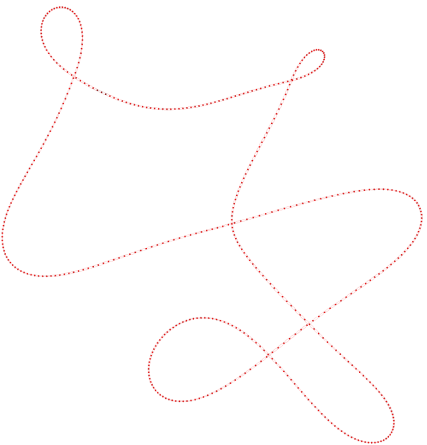    |                            |     |
| NCTC12067 | <i>Streptococcus pyogenes</i> | 188 | 1       | 0       | 0       |    | Finished circular assembly |    |
| NCTC12068 | <i>Streptococcus pyogenes</i> | 220 | 1       | 0       | 0       |   | Finished circular assembly |  |
| NCTC12069 | <i>Streptococcus pyogenes</i> | 185 | 1       | 0       | 0       |  | Finished circular assembly |  |
| NCTC12090 | <i>Streptococcus equi</i>     | 0   | 1       | 0       | 0       |  | Finished circular assembly |  |
| NCTC12091 | <i>Streptococcus equi</i>     | 111 | 1       | 0       | 0       |  | Finished circular assembly |  |
| NCTC12092 | <i>Streptococcus equi</i>     | 85  | Pending | Pending | Pending |                                                                                      | Finished circular assembly |                                                                                       |

|           |                                            |     |         |         |         |                                                                                      |                            |                                                                                       |
|-----------|--------------------------------------------|-----|---------|---------|---------|--------------------------------------------------------------------------------------|----------------------------|---------------------------------------------------------------------------------------|
|           |                                            |     |         |         |         | 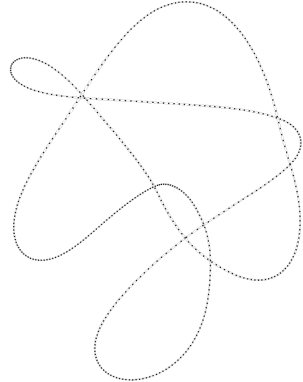   |                            |    |
| NCTC12100 | <i>Staphylococcus epidermidis</i>          | 88  | Pending | Pending | Pending |    | Finished circular assembly |    |
| NCTC12101 | <i>Staphylococcus auricularis</i>          | 101 | 1       | 0       | 0       |   | Finished circular assembly |   |
| NCTC12103 | <i>Staphylococcus sciuri subsp. sciuri</i> | 143 | 1       | 0       | 0       |  | Finished circular assembly |  |
| NCTC12112 | <i>Fusobacterium ulcerans</i>              | 71  | 0       | 0       | 1       |  | Finished circular assembly |  |
| NCTC12116 | <i>Salmonella enterica subsp. enterica</i> | 40  | Pending | Pending | Pending |  | Finished circular assembly |  |
| NCTC12120 | <i>Cedecea neteri</i>                      | 74  | 7       | 1       | 0       |                                                                                      | Mis-assembly/Fragmented    |                                                                                       |



|           |                                  |    |   |   |   |  |  |                                                |
|-----------|----------------------------------|----|---|---|---|--|--|------------------------------------------------|
|           |                                  |    |   |   |   |  |  |                                                |
| NCTC12123 | <i>Enterobacter asburiae</i>     | 64 | 2 | 3 | 0 |  |  | Finished assembly with multiple traversals<br> |
| NCTC12124 | <i>Enterobacter amnigenus</i>    | 38 | 1 | 0 | 0 |  |  | Finished circular assembly<br>                 |
| NCTC12125 | <i>Kluyvera intermedia</i>       | 90 | 1 | 0 | 0 |  |  | Finished assembly with multiple traversals<br> |
| NCTC12126 | <i>Enterobacter cancerogenus</i> | 42 | 6 | 1 | 0 |  |  | Mis-assembly/Fragmented<br>                    |
| NCTC12127 | <i>Shimwellia blattae</i>        | 79 | 1 | 0 | 0 |  |  | Finished circular assembly<br>                 |
| NCTC12128 | <i>Escherichia fergusonii</i>    | 46 | 1 | 1 | 0 |  |  | Finished circular assembly<br>                 |

|           |                                 |    |   |   |   |                                                                                      |                            |                                                                                       |
|-----------|---------------------------------|----|---|---|---|--------------------------------------------------------------------------------------|----------------------------|---------------------------------------------------------------------------------------|
|           |                                 |    |   |   |   | 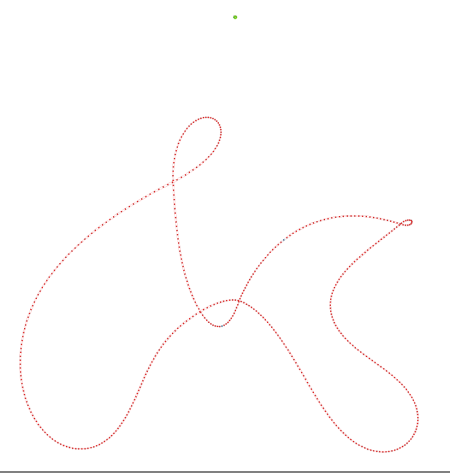    |                            |     |
| NCTC12129 | <i>Escherichia hermannii</i>    | 70 | 1 | 0 | 0 |    | Finished circular assembly |    |
| NCTC12130 | <i>Escherichia vulneris</i>     | 62 | 1 | 0 | 0 |   | Finished circular assembly |   |
| NCTC12131 | <i>Yokenella regensburgei</i>   | 41 | 3 | 0 | 0 |  | Mis-assembly/Fragmented    |  |
| NCTC12132 | <i>Moellerella wisconsensis</i> | 86 | 1 | 0 | 0 |  | Mis-assembly/Fragmented    |  |
| NCTC12143 | <i>Campylobacter coli</i>       | 16 | 0 | 0 | 3 |  | Finished circular assembly |  |
| NCTC12146 | <i>Klebsiella terrigena</i>     | 11 | 0 | 0 | 2 |                                                                                      | Mis-assembly/Fragmented    |                                                                                       |

|           |                                   |     |   |   |     |  |                                             |  |
|-----------|-----------------------------------|-----|---|---|-----|--|---------------------------------------------|--|
|           |                                   |     |   |   |     |  |                                             |  |
| NCTC12151 | <i>Leminorella richardii</i>      | 51  | 1 | 0 | 0   |  | Finished assembly (lacking circularisation) |  |
| NCTC12152 | <i>Leminorella grimontii</i>      | 88  | 1 | 0 | 0   |  | Finished circular assembly                  |  |
| NCTC12156 | <i>Acinetobacter baumannii</i>    | 123 | 1 | 0 | 1   |  | Mis-assembly/Fragmented                     |  |
| NCTC12157 | <i>Ewingella americana</i>        | 76  | 1 | 1 | 0   |  | Finished assembly (lacking circularisation) |  |
| NCTC12158 | <i>Klebsiella planticola</i>      | 16  | 0 | 0 | 367 |  | Finished circular assembly                  |  |
| NCTC12167 | <i>Streptococcus vestibularis</i> | 111 | 1 | 0 | 0   |  | Finished circular assembly                  |  |

|           |                                  |    |         |         |         |                                                                                      |                                             |                                                                                       |
|-----------|----------------------------------|----|---------|---------|---------|--------------------------------------------------------------------------------------|---------------------------------------------|---------------------------------------------------------------------------------------|
|           |                                  |    |         |         |         | 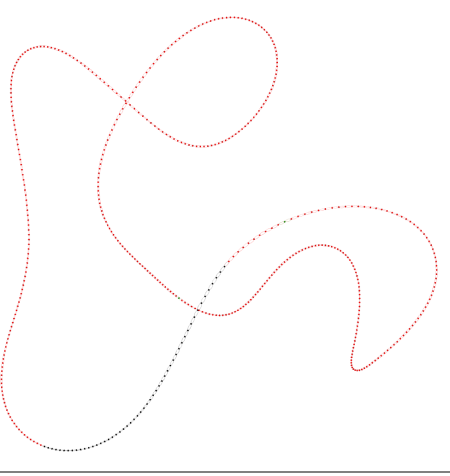    |                                             |     |
| NCTC12168 | <i>Ochrobactrum anthropi</i>     | 60 | 2       | 0       | 3       |    | Finished circular assembly                  |    |
| NCTC12171 | <i>Ochrobactrum intermedium</i>  | 64 | 2       | 1       | 0       |   | Finished circular assembly                  |   |
| NCTC12179 | <i>Legionella pneumophila</i>    | 33 | Pending | Pending | Pending |  | Finished assembly (lacking circularisation) |  |
| NCTC12180 | <i>Legionella pneumophila</i>    | 47 | 1       | 0       | 1       |  | Finished circular assembly                  |  |
| NCTC12194 | <i>Haemophilus influenzae</i>    | 83 | 1       | 0       | 0       |  | Finished assembly (lacking circularisation) |  |
| NCTC12195 | <i>Staphylococcus gallinarum</i> | 33 | 0       | 0       | 5       |                                                                                      | Mis-assembly/Fragmented                     |                                                                                       |

|           |                                      |     |         |         |         |                                                                                      |                            |                                                                                       |
|-----------|--------------------------------------|-----|---------|---------|---------|--------------------------------------------------------------------------------------|----------------------------|---------------------------------------------------------------------------------------|
|           |                                      |     |         |         |         | 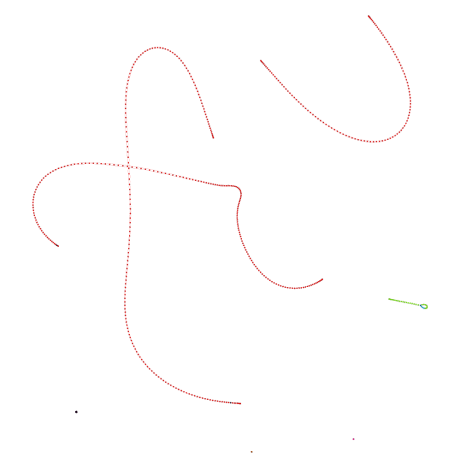    |                            |     |
| NCTC12196 | <i>Staphylococcus caprae</i>         | 53  | 1       | 0       | 4       |    | Finished circular assembly |    |
| NCTC12217 | <i>Staphylococcus lugdenensis</i>    | 74  | 1       | 0       | 0       |   | Finished circular assembly |   |
| NCTC12218 | <i>Staphylococcus schleiferi</i>     | 49  | Pending | Pending | Pending |  | Finished circular assembly |  |
| NCTC12224 | <i>Streptococcus hyointestinalis</i> | 38  | 1       | 1       | 5       |  | Mis-assembly/Fragmented    |  |
| NCTC12225 | <i>Staphylococcus delphini</i>       | 107 | 1       | 0       | 0       |  | Finished circular assembly |  |
| NCTC12232 | <i>Staphylococcus aureus</i>         | 86  | 1       | 1       | 0       |                                                                                      | Finished circular assembly |                                                                                       |

|           |                                |     |         |         |         |                                                                                      |                            |                                                                                       |
|-----------|--------------------------------|-----|---------|---------|---------|--------------------------------------------------------------------------------------|----------------------------|---------------------------------------------------------------------------------------|
|           |                                |     |         |         |         | 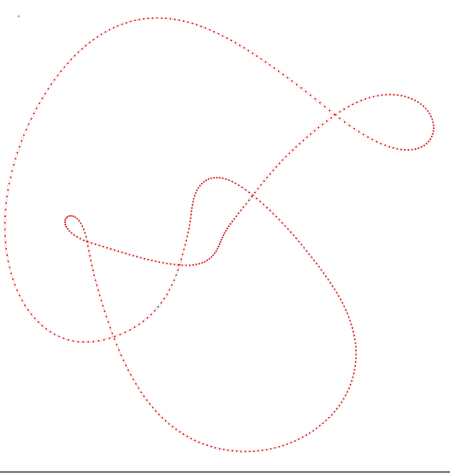    |                            |     |
| NCTC12233 | <i>Staphylococcus aureus</i>   | 99  | 1       | 0       | 0       |    | Finished circular assembly |    |
| NCTC12241 | <i>Escherichia coli</i>        | 50  | 1       | 1       | 1       |   | Finished circular assembly |   |
| NCTC12261 | <i>Streptococcus mitis</i>     | 39  | Pending | Pending | Pending |  | Mis-assembly/Fragmented    |  |
| NCTC12278 | <i>Streptococcus ferus</i>     | 185 | 1       | 0       | 0       |  | Finished circular assembly |  |
| NCTC12282 | <i>Budvicia aquatica</i>       | 31  | 2       | 0       | 0       |  | Mis-assembly/Fragmented    |  |
| NCTC12413 | <i>Staphylococcus arlettae</i> | 91  | 1       | 1       | 3       |                                                                                      | Finished circular assembly |                                                                                       |

|           |                                              |     |   |   |   |                                                                                      |                                             |                                                                                       |
|-----------|----------------------------------------------|-----|---|---|---|--------------------------------------------------------------------------------------|---------------------------------------------|---------------------------------------------------------------------------------------|
|           |                                              |     |   |   |   | 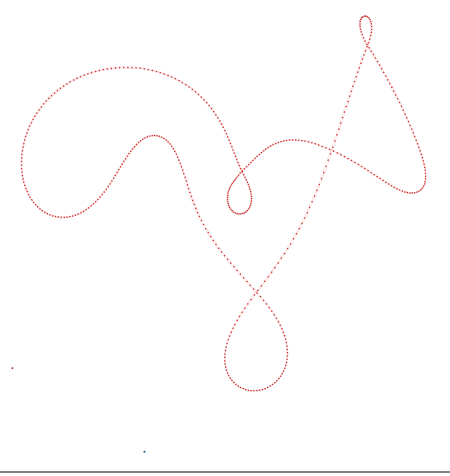    |                                             |     |
| NCTC12415 | <i>Staphylococcus kloosii</i>                | 179 | 1 | 1 | 0 |    | Finished circular assembly                  |    |
| NCTC12416 | <i>Salmonella enterica subsp. enterica</i>   | 43  | 0 | 0 | 3 |  | Finished assembly (lacking circularisation) |  |
| NCTC12417 | <i>Salmonella enterica subsp. diarizonae</i> | 77  | 1 | 2 | 0 |  | Finished circular assembly                  |  |
| NCTC12418 | <i>Salmonella enterica subsp. houtenae</i>   | 28  | 0 | 0 | 2 |  | Finished circular assembly                  |  |
| NCTC12419 | <i>Salmonella bongori</i>                    | 68  | 1 | 0 | 0 |  | Finished circular assembly                  |  |
| NCTC12420 | <i>Salmonella enterica subsp. indica</i>     | 82  | 3 | 2 | 0 |                                                                                      | Finished circular assembly                  |                                                                                       |

|           |                                 |     |         |         |         |                                                                                      |                                             |                                                                                       |
|-----------|---------------------------------|-----|---------|---------|---------|--------------------------------------------------------------------------------------|---------------------------------------------|---------------------------------------------------------------------------------------|
|           |                                 |     |         |         |         | 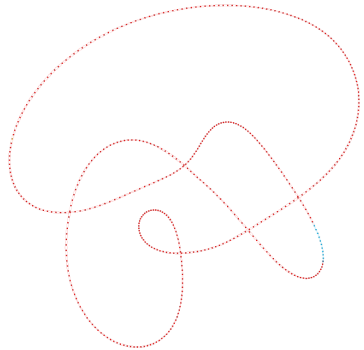   |                                             |     |
| NCTC12421 | <i>Enterococcus cecorum</i>     | 81  | 1       | 0       | 0       |    | Finished circular assembly                  |    |
| NCTC12450 | <i>Legionella sainthelensi</i>  | 37  | 1       | 0       | 0       |   | Finished circular assembly                  |   |
| NCTC12463 | <i>Klebsiella pneumoniae</i>    | 44  | 0       | 0       | 12      |  | Finished assembly (lacking circularisation) |  |
| NCTC12479 | <i>Streptococcus cristatus</i>  | 102 | Pending | Pending | Pending |  | Finished circular assembly                  |  |
| NCTC12495 | <i>Streptococcus pneumoniae</i> | 10  | Pending | Pending | Pending |  | Finished circular assembly                  |  |
| NCTC12570 | <i>Campylobacter coli</i>       | 228 | 1       | 1       | 0       |                                                                                      | Finished circular assembly                  |                                                                                       |



|           |                                            |    |         |         |         |                                                                                      |                                             |                                                                                       |
|-----------|--------------------------------------------|----|---------|---------|---------|--------------------------------------------------------------------------------------|---------------------------------------------|---------------------------------------------------------------------------------------|
|           |                                            |    |         |         |         | 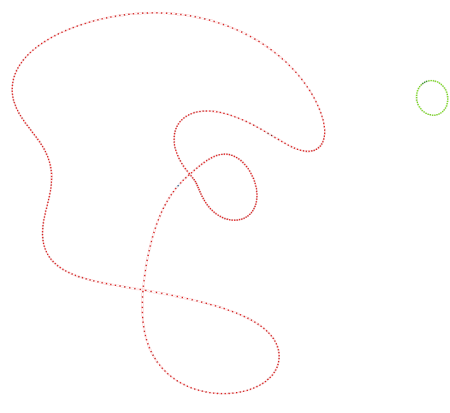   |                                             |     |
| NCTC12650 | <i>Escherichia coli</i>                    | 37 | 1       | 2       | 0       |    | Finished circular assembly                  |    |
| NCTC12652 | <i>Escherichia coli</i>                    | 63 | 1       | 1       | 2       |   | Finished circular assembly                  |   |
| NCTC12653 | <i>Escherichia coli</i>                    | 71 | Pending | Pending | Pending |  | Finished circular assembly                  |  |
| NCTC12654 | <i>Escherichia coli</i>                    | 50 | 0       | 0       | 5       |  | Finished assembly (lacking circularisation) |  |
| NCTC12655 | <i>Escherichia coli</i>                    | 49 | 1       | 0       | 0       |  | Finished circular assembly                  |  |
| NCTC12694 | <i>Salmonella enterica subsp. enterica</i> | 19 | 0       | 0       | 121     |                                                                                      | Mis-assembly/Fragmented                     |                                                                                       |

|           |                               |     |         |         |         |                                                                                      |                                             |                                                                                       |
|-----------|-------------------------------|-----|---------|---------|---------|--------------------------------------------------------------------------------------|---------------------------------------------|---------------------------------------------------------------------------------------|
|           |                               |     |         |         |         | 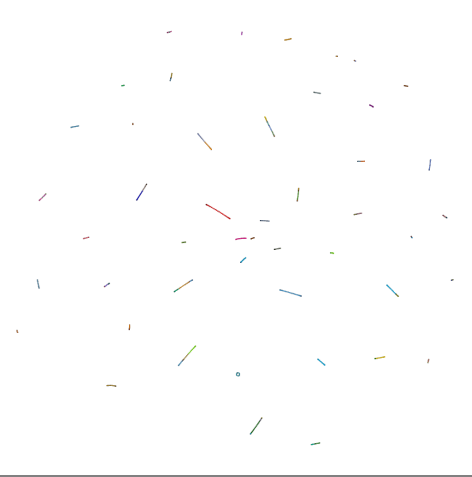    |                                             |     |
| NCTC12696 | <i>Streptococcus pyogenes</i> | 118 | Pending | Pending | Pending |    | Finished assembly with multiple traversals  |    |
| NCTC12699 | <i>Haemophilus influenzae</i> | 94  | 1       | 0       | 0       |   | Finished circular assembly                  |   |
| NCTC12700 | <i>Neisseria gonorrhoeae</i>  | 172 | 1       | 1       | 1       |  | Finished circular assembly                  |  |
| NCTC12709 | <i>Salmonella enterica</i>    | 56  | 1       | 1       | 0       |  | Finished circular assembly                  |  |
| NCTC12737 | <i>Proteus penneri</i>        | 88  | 1       | 1       | 0       |  | Finished assembly (lacking circularisation) |  |
| NCTC12839 | <i>Escherichia coli</i>       | 50  | 1       | 1       | 0       |                                                                                      | Finished circular assembly                  |                                                                                       |

|           |                                    |     |         |         |         |                                                                                      |                                             |                                                                                                                                                                                                                                                                         |
|-----------|------------------------------------|-----|---------|---------|---------|--------------------------------------------------------------------------------------|---------------------------------------------|-------------------------------------------------------------------------------------------------------------------------------------------------------------------------------------------------------------------------------------------------------------------------|
|           |                                    |     |         |         |         | 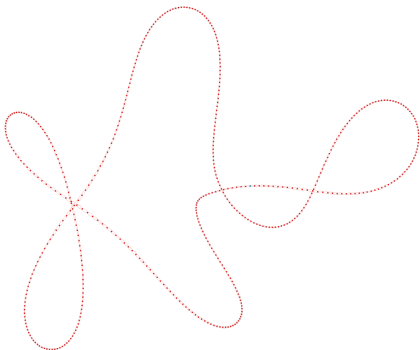    |                                             |                                                                                                                                                                                      |
| NCTC12840 | <i>Streptococcus pyogenes</i>      | 119 | 1       | 0       | 0       |    | Finished circular assembly                  |                                                                                                                                                                                      |
| NCTC12841 | <i>Streptococcus pyogenes</i>      | 75  | Pending | Pending | Pending |  | Mis-assembly                                |                                                                                                                                                                                     |
| NCTC12854 | <i>Streptococcus parasanguinis</i> | 109 | 1       | 0       | 2       |  | Finished circular assembly                  |                                                                                                                                                                                    |
| NCTC12874 | <i>Brachyspira pilosicoli</i>      | 18  | 0       | 0       | 3       |  | Mis-assembly/Fragmented                     | <br><br> |
| NCTC12880 | <i>Staphylococcus aureus</i>       | 139 | 0       | 0       | 2       |  | Finished circular assembly                  |                                                                                                                                                                                    |
| NCTC12899 | <i>Bartonella quintana</i>         | 141 | Pending | Pending | Pending |                                                                                      | Finished assembly (lacking circularisation) |                                                                                                                                                                                                                                                                         |

|           |                                   |     |   |   |    |                                                                                      |                                             |                                                                                       |
|-----------|-----------------------------------|-----|---|---|----|--------------------------------------------------------------------------------------|---------------------------------------------|---------------------------------------------------------------------------------------|
|           |                                   |     |   |   |    | 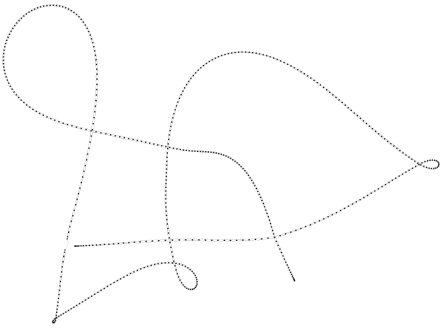   |                                             |     |
| NCTC12924 | <i>Pseudomonas aeruginosa</i>     | 34  | 0 | 0 | 1  |    | Finished circular assembly                  |    |
| NCTC12950 | <i>Escherichia coli</i>           | 35  | 1 | 0 | 1  |  | Finished circular assembly                  |  |
| NCTC12951 | <i>Pseudomonas aeruginosa</i>     | 36  | 0 | 0 | 28 |  | Finished assembly (lacking circularisation) |  |
| NCTC12957 | <i>Streptococcus acidominimus</i> | 137 | 0 | 0 | 5  |  | Finished circular assembly                  |  |
| NCTC12958 | <i>Streptococcus thermophilus</i> | 126 | 1 | 0 | 0  |  | Mis-assembly/Fragmented                     |  |
| NCTC12961 | <i>Serratia plymuthica</i>        | 37  | 1 | 0 | 0  |                                                                                      | Finished circular assembly                  |                                                                                       |

|           |                                                      |     |         |         |         |                                                                                      |                                            |                                                                                       |
|-----------|------------------------------------------------------|-----|---------|---------|---------|--------------------------------------------------------------------------------------|--------------------------------------------|---------------------------------------------------------------------------------------|
|           |                                                      |     |         |         |         | 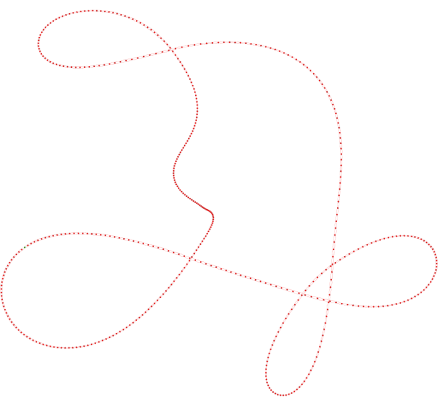   |                                            |    |
| NCTC12965 | <i>Serratia fonticola</i>                            | 47  | 1       | 0       | 0       |    | Finished circular assembly                 |    |
| NCTC12969 | <i>Streptococcus equinus</i>                         | 69  | Pending | Pending | Pending |   | Finished assembly with multiple traversals |   |
| NCTC12971 | <i>Serratia rubidaea</i>                             | 58  | 1       | 0       | 0       |  | Finished circular assembly                 |  |
| NCTC12973 | <i>Staphylococcus aureus</i>                         | 192 | Pending | Pending | Pending |  | Mis-assembly/Fragmented                    |  |
| NCTC12981 | <i>Staphylococcus aureus</i>                         | 86  | Pending | Pending | Pending |  | Finished circular assembly                 |  |
| NCTC12982 | <i>Yersinia enterocolitica subsp. enterocolitica</i> | 46  | 1       | 0       | 0       |                                                                                      | Finished circular assembly                 |                                                                                       |

|           |                                 |    |   |   |   |                                                                                      |                                             |                                                                                       |
|-----------|---------------------------------|----|---|---|---|--------------------------------------------------------------------------------------|---------------------------------------------|---------------------------------------------------------------------------------------|
|           |                                 |    |   |   |   | 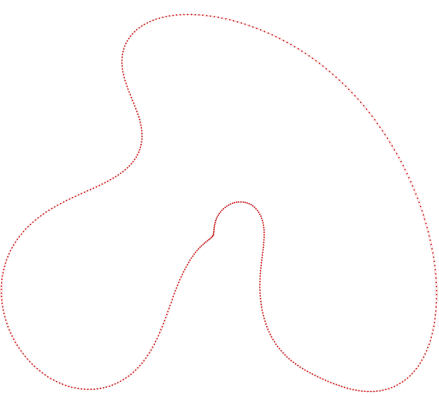   |                                             |     |
| NCTC12986 | <i>Yersinia ruckeri</i>         | 44 | 1 | 1 | 1 |    | Finished assembly (lacking circularisation) |    |
| NCTC12993 | <i>Kluyvera cryocrescens</i>    | 46 | 5 | 1 | 0 |   | Finished circular assembly                  |   |
| NCTC12998 | <i>Raoultella planticola</i>    | 41 | 1 | 1 | 0 |  | Mis-assembly/Fragmented                     |  |
| NCTC13032 | <i>Leclercia adecarboxylata</i> | 57 | 1 | 0 | 0 |  | Finished circular assembly                  |  |
| NCTC13038 | <i>Raoultella terrigena</i>     | 70 | 1 | 0 | 0 |  | Mis-assembly/Fragmented                     |  |
| NCTC13046 | <i>Brachyspira pilosicoli</i>   | 48 | 1 | 0 | 1 |                                                                                      | Finished circular assembly                  |                                                                                       |

|           |                              |    |   |   |   |                                                                                      |                            |                                                                                       |
|-----------|------------------------------|----|---|---|---|--------------------------------------------------------------------------------------|----------------------------|---------------------------------------------------------------------------------------|
|           |                              |    |   |   |   | 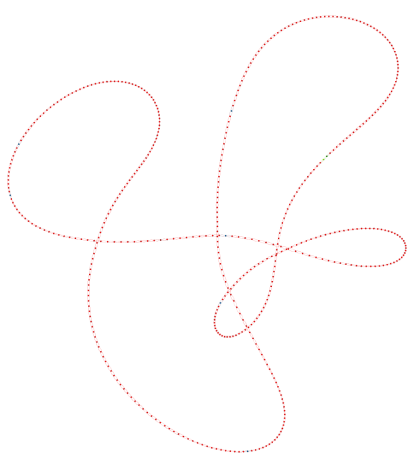    |                            |     |
| NCTC13095 | <i>Klebsiella planticola</i> | 38 | 1 | 1 | 3 |    | Finished circular assembly |    |
| NCTC13096 | <i>Klebsiella planticola</i> | 53 | 1 | 0 | 0 |   | Finished circular assembly |   |
| NCTC13097 | <i>Raoultella terrigena</i>  | 73 | 1 | 1 | 0 |  | Finished circular assembly |  |
| NCTC13098 | <i>Raoultella terrigena</i>  | 24 | 1 | 0 | 0 |  | Mis-assembly/Fragmented    |  |
| NCTC13125 | <i>Escherichia coli</i>      | 49 | 1 | 2 | 4 |  | Mis-assembly/Fragmented    |  |
| NCTC13127 | <i>Escherichia coli</i>      | 38 | 1 | 0 | 3 |                                                                                      | Finished circular assembly |                                                                                       |

|           |                              |     |         |         |         |                                                                                      |                            |                                                                                       |
|-----------|------------------------------|-----|---------|---------|---------|--------------------------------------------------------------------------------------|----------------------------|---------------------------------------------------------------------------------------|
|           |                              |     |         |         |         | 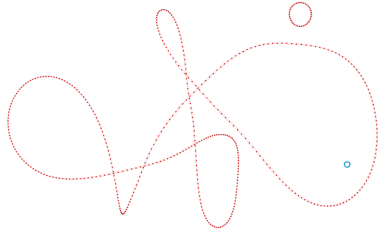   |                            |     |
| NCTC13128 | <i>Escherichia coli</i>      | 82  | 0       | 0       | 3       |   | Finished circular assembly |    |
| NCTC13131 | <i>Staphylococcus aureus</i> | 55  | Pending | Pending | Pending |  | Finished circular assembly |   |
| NCTC13132 | <i>Staphylococcus aureus</i> | 142 | 1       | 1       | 2       |  | Finished circular assembly |  |
| NCTC13133 | <i>Staphylococcus aureus</i> | 82  | 1       | 1       | 0       |  | Finished circular assembly |  |
| NCTC13135 | <i>Staphylococcus aureus</i> | 141 | 1       | 0       | 2       |  | Finished circular assembly |  |
| NCTC13136 | <i>Staphylococcus aureus</i> | 116 | 1       | 1       | 0       |                                                                                      | Finished circular assembly |                                                                                       |



|           |                              |     |   |   |   |                                                                                       |                            |                                                                                                                                                                                                                                                                                                                                                                  |
|-----------|------------------------------|-----|---|---|---|---------------------------------------------------------------------------------------|----------------------------|------------------------------------------------------------------------------------------------------------------------------------------------------------------------------------------------------------------------------------------------------------------------------------------------------------------------------------------------------------------|
|           |                              |     |   |   |   | 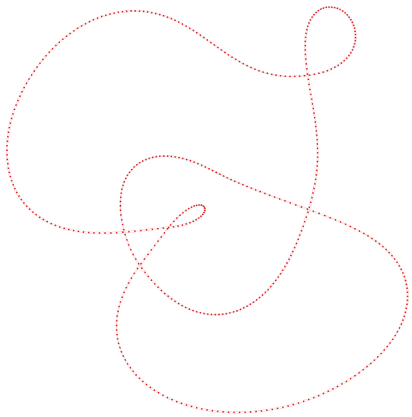     |                            |                                                                                                                                                                                                                                                                                |
| NCTC13137 | <i>Staphylococcus aureus</i> | 152 | 1 | 0 | 0 |     | Finished circular assembly |                                                                                                                                                                                                                                                                               |
| NCTC13138 | <i>Staphylococcus aureus</i> | 160 | 1 | 1 | 0 |   | Finished circular assembly | <br>                                                                                                                                                                                    |
| NCTC13139 | <i>Staphylococcus aureus</i> | 150 | 1 | 1 | 2 |   | Finished circular assembly | <br>                                                                                                                                                                                   |
| NCTC13140 | <i>Staphylococcus aureus</i> | 141 | 1 | 0 | 0 |  | Finished circular assembly |                                                                                                                                                                                                                                                                             |
| NCTC13141 | <i>Staphylococcus aureus</i> | 92  | 0 | 0 | 4 |   | Finished circular assembly | <br><br><br> |
| NCTC13142 | <i>Staphylococcus aureus</i> | 77  | 1 | 0 | 0 |                                                                                       | Finished circular assembly |                                                                                                                                                                                                                                                                                                                                                                  |

|           |                                                              |     |   |   |    |  |                            |  |
|-----------|--------------------------------------------------------------|-----|---|---|----|--|----------------------------|--|
|           |                                                              |     |   |   |    |  |                            |  |
| NCTC13143 | <i>Staphylococcus aureus</i>                                 | 45  | 0 | 0 | 3  |  | Mis-assembly/Fragmented    |  |
| NCTC13145 | <i>Proteus vulgaris</i>                                      | 12  | 1 | 0 | 0  |  | Mis-assembly/Fragmented    |  |
| NCTC13148 | <i>Escherichia coli</i>                                      | 24  | 0 | 0 | 6  |  | Mis-assembly/Fragmented    |  |
| NCTC13169 | <i>Enterococcus faecium</i>                                  | 139 | 1 | 1 | 0  |  | Finished circular assembly |  |
| NCTC13175 | <i>Salmonella enterica subsp. enterica serovar Goldcoast</i> | 103 | 1 | 0 | 0  |  | Finished circular assembly |  |
| NCTC13196 | <i>Staphylococcus aureus</i>                                 | 92  | 0 | 0 | 17 |  | Mis-assembly/Fragmented    |  |

|           |                                       |     |         |         |         |                                                                                      |                            |                                                                                       |
|-----------|---------------------------------------|-----|---------|---------|---------|--------------------------------------------------------------------------------------|----------------------------|---------------------------------------------------------------------------------------|
|           |                                       |     |         |         |         | 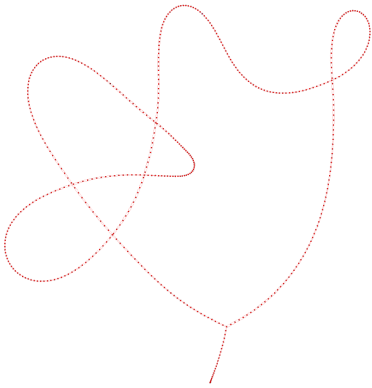   |                            |     |
| NCTC13216 | <i>Escherichia coli</i>               | 204 | 0       | 0       | 3       |   | Finished circular assembly |    |
| NCTC13251 | <i>Bordetella pertussis</i>           | 65  | 1       | 0       | 0       |   | Finished circular assembly |   |
| NCTC13276 | <i>Streptococcus pneumoniae</i>       | 19  | Pending | Pending | Pending |  | Mis-assembly/Fragmented    |  |
| NCTC13277 | <i>Staphylococcus aureus MRSA 252</i> | 51  | 1       | 0       | 0       |  | Finished circular assembly |  |
| NCTC13297 | <i>Staphylococcus aureus</i>          | 129 | 1       | 1       | 0       |  | Finished circular assembly |  |
| NCTC13298 | <i>Staphylococcus aureus</i>          | 122 | 1       | 0       | 3       |                                                                                      | Finished circular assembly |                                                                                       |

|           |                                                                |     |   |   |   |                                                                                      |                            |                                                                                       |
|-----------|----------------------------------------------------------------|-----|---|---|---|--------------------------------------------------------------------------------------|----------------------------|---------------------------------------------------------------------------------------|
|           |                                                                |     |   |   |   | 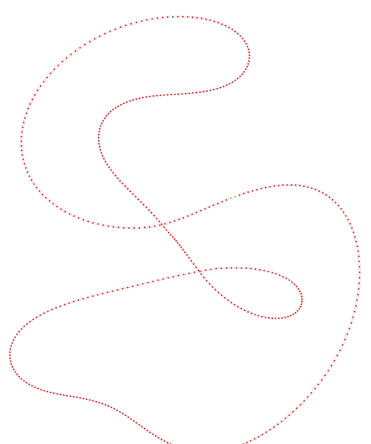    |                            |     |
| NCTC13299 | <i>Staphylococcus aureus</i>                                   | 121 | 1 | 0 | 1 |    | Finished circular assembly |    |
| NCTC13300 | <i>Staphylococcus aureus</i>                                   | 136 | 1 | 1 | 0 |   | Finished circular assembly |   |
| NCTC13301 | <i>Acinetobacter baumannii</i>                                 | 80  | 0 | 0 | 3 |  | Finished circular assembly |  |
| NCTC13305 | <i>Acinetobacter baumannii</i>                                 | 101 | 0 | 0 | 7 |  | Finished circular assembly |  |
| NCTC13307 | <i>Peptoclostridium difficile</i>                              | 45  | 4 | 0 | 0 |  | Mis-assembly/Fragmented    |  |
| NCTC13347 | <i>Salmonella enterica subsp. enterica serovar Typhimurium</i> | 60  | 1 | 2 | 1 |                                                                                      | Finished circular assembly |                                                                                       |

|           |                                                                |    |   |   |    |  |                                             |  |
|-----------|----------------------------------------------------------------|----|---|---|----|--|---------------------------------------------|--|
|           |                                                                |    |   |   |    |  |                                             |  |
| NCTC13348 | <i>Salmonella enterica subsp. enterica serovar Typhimurium</i> | 41 | 4 | 2 | 0  |  | Mis-assembly/Fragmented                     |  |
| NCTC13349 | <i>Salmonella enteritidis</i>                                  | 44 | 1 | 1 | 0  |  | Finished circular assembly                  |  |
| NCTC13351 | <i>Escherichia coli</i>                                        | 58 | 1 | 1 | 0  |  | Finished circular assembly                  |  |
| NCTC13352 | <i>Escherichia coli</i>                                        | 31 | 1 | 1 | 2  |  | Finished circular assembly                  |  |
| NCTC13353 | <i>Escherichia coli</i>                                        | 40 | 0 | 0 | 12 |  | Finished assembly (lacking circularisation) |  |
| NCTC13359 | <i>Pseudomonas aeruginosa</i>                                  | 37 | 0 | 0 | 1  |  | Finished circular assembly                  |  |

|           |                                   |     |   |   |   |                                                                                      |                            |                                                                                       |
|-----------|-----------------------------------|-----|---|---|---|--------------------------------------------------------------------------------------|----------------------------|---------------------------------------------------------------------------------------|
|           |                                   |     |   |   |   | 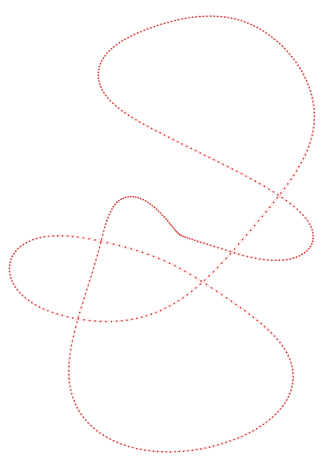    |                            |     |
| NCTC13360 | <i>Staphylococcus epidermidis</i> | 61  | 1 | 7 | 0 |   | Finished circular assembly |    |
| NCTC13368 | <i>Klebsiella pneumoniae</i>      | 54  | 1 | 1 | 1 |  | Finished circular assembly |   |
| NCTC13373 | <i>Staphylococcus aureus</i>      | 70  | 1 | 0 | 1 |  | Finished circular assembly |  |
| NCTC13376 | <i>Proteus mirabilis</i>          | 57  | 1 | 1 | 1 |  | Finished circular assembly |  |
| NCTC13377 | <i>Haemophilus influenzae</i>     | 113 | 1 | 0 | 0 |  | Finished circular assembly |  |
| NCTC13384 | <i>Escherichia coli</i>           | 18  | 1 | 0 | 5 |                                                                                      | Mis-assembly/Fragmented    |                                                                                       |

|           |                                |     |         |         |         |  |  |                                                                                      |                                                                                                                     |
|-----------|--------------------------------|-----|---------|---------|---------|--|--|--------------------------------------------------------------------------------------|---------------------------------------------------------------------------------------------------------------------|
|           |                                |     |         |         |         |  |  | 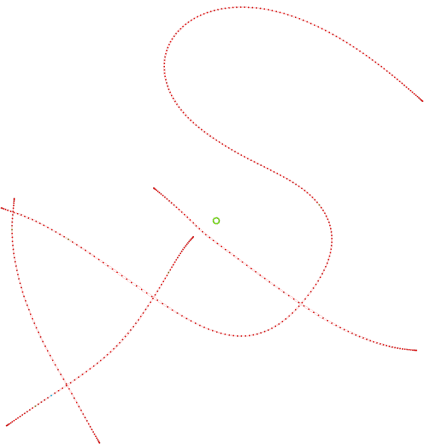    |                                   |
| NCTC13394 | <i>Staphylococcus aureus</i>   | 149 | 1       | 0       | 0       |  |  |    | Finished circular assembly<br>   |
| NCTC13395 | <i>Staphylococcus aureus</i>   | 53  | 1       | 0       | 0       |  |  |   | Finished circular assembly<br>  |
| NCTC13400 | <i>Escherichia coli</i>        | 82  | 1       | 1       | 0       |  |  |  | Finished circular assembly<br> |
| NCTC13405 | <i>Enterobacter cloacae</i>    | 50  | Pending | Pending | Pending |  |  |  | Finished circular assembly<br> |
| NCTC13406 | <i>Enterobacter cloacae</i>    | 70  | 1       | 0       | 2       |  |  |  | Finished circular assembly<br> |
| NCTC13420 | <i>Acinetobacter baumannii</i> | 114 | 0       | 0       | 6       |  |  |                                                                                      | Finished circular assembly<br> |

|           |                                |     |   |   |   |  |                                             |  |
|-----------|--------------------------------|-----|---|---|---|--|---------------------------------------------|--|
|           |                                |     |   |   |   |  |                                             |  |
| NCTC13421 | <i>Acinetobacter baumannii</i> | 105 | 0 | 0 | 1 |  | Finished circular assembly                  |  |
| NCTC13422 | <i>Acinetobacter baumannii</i> | 98  | 1 | 1 | 1 |  | Finished circular assembly                  |  |
| NCTC13424 | <i>Acinetobacter baumannii</i> | 81  | 1 | 1 | 1 |  | Finished circular assembly                  |  |
| NCTC13434 | <i>Staphylococcus aureus</i>   | 148 | 1 | 1 | 0 |  | Finished circular assembly                  |  |
| NCTC13435 | <i>Staphylococcus aureus</i>   | 61  | 1 | 2 | 0 |  | Finished assembly (lacking circularisation) |  |
| NCTC13437 | <i>Pseudomonas aeruginosa</i>  | 29  | 0 | 0 | 3 |  | Mis-assembly/Fragmented                     |  |



|           |                              |    |   |   |   |                                                                                      |                            |                                                                                       |
|-----------|------------------------------|----|---|---|---|--------------------------------------------------------------------------------------|----------------------------|---------------------------------------------------------------------------------------|
|           |                              |    |   |   |   | 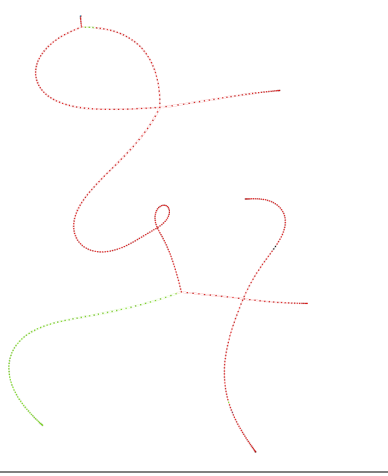    |                            |     |
| NCTC13438 | <i>Klebsiella pneumoniae</i> | 50 | 1 | 0 | 5 |    | Finished circular assembly |    |
| NCTC13439 | <i>Klebsiella pneumoniae</i> | 48 | 1 | 3 | 0 |   | Finished circular assembly |   |
| NCTC13440 | <i>Klebsiella pneumoniae</i> | 53 | 1 | 2 | 0 |  | Finished circular assembly |  |
| NCTC13441 | <i>Escherichia coli</i>      | 55 | 1 | 1 | 5 |  | Finished circular assembly |  |
| NCTC13442 | <i>Klebsiella pneumoniae</i> | 43 | 1 | 2 | 3 |  | Finished circular assembly |  |
| NCTC13443 | <i>Klebsiella pneumoniae</i> | 34 | 0 | 0 | 4 |                                                                                      | Finished circular assembly |                                                                                       |

|           |                         |    |   |   |    |                                                                                      |                            |                                                                                       |
|-----------|-------------------------|----|---|---|----|--------------------------------------------------------------------------------------|----------------------------|---------------------------------------------------------------------------------------|
|           |                         |    |   |   |    | 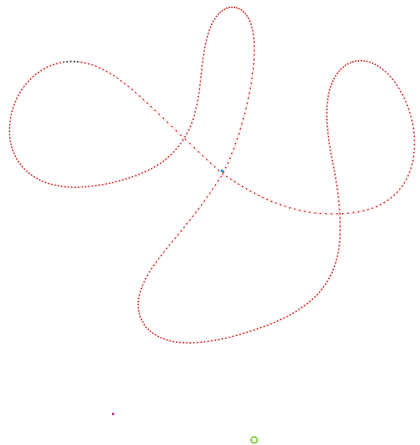    |                            |     |
| NCTC13450 | <i>Escherichia coli</i> | 65 | 1 | 1 | 0  |    | Finished circular assembly |    |
| NCTC13451 | <i>Escherichia coli</i> | 49 | 1 | 1 | 1  |  | Finished circular assembly |   |
| NCTC13452 | <i>Escherichia coli</i> | 64 | 1 | 0 | 4  |  | Finished circular assembly |  |
| NCTC13461 | <i>Escherichia coli</i> | 74 | 0 | 0 | 6  |  | Finished circular assembly |  |
| NCTC13462 | <i>Escherichia coli</i> | 51 | 0 | 0 | 12 |  | Mis-assembly/Fragmented    |  |
| NCTC13463 | <i>Escherichia coli</i> | 62 | 1 | 1 | 4  |                                                                                      | Mis-assembly/Fragmented    |                                                                                       |

|           |                                       |     |         |         |         |                                                                                      |                            |                                                                                       |
|-----------|---------------------------------------|-----|---------|---------|---------|--------------------------------------------------------------------------------------|----------------------------|---------------------------------------------------------------------------------------|
|           |                                       |     |         |         |         | 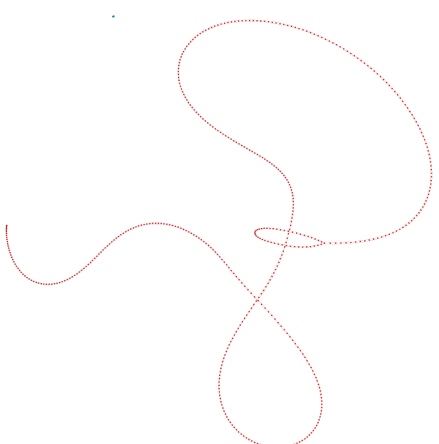    |                            |     |
| NCTC13464 | <i>Enterobacter cloacae</i>           | 73  | 1       | 1       | 0       |    | Finished circular assembly |    |
| NCTC13465 | <i>Klebsiella pneumoniae</i>          | 20  | 0       | 0       | 22      |   | Mis-assembly/Fragmented    |   |
| NCTC13476 | <i>Escherichia coli</i>               | 10  | Pending | Pending | Pending |  | Mis-assembly/Fragmented    |  |
| NCTC13483 | <i>Neisseria gonorrhoeae</i>          | 150 | Pending | Pending | Pending |  | Finished circular assembly |  |
| NCTC13532 | <i>Chryseobacterium indoltheticum</i> | 46  | 1       | 2       | 1       |  | Finished circular assembly |  |
| NCTC13533 | <i>Chryseobacterium shigense</i>      | 31  | 0       | 0       | 3       |                                                                                      | Mis-assembly/Fragmented    |                                                                                       |

|           |                                     |     |   |   |    |                                                                                      |                                                |                                                                                       |
|-----------|-------------------------------------|-----|---|---|----|--------------------------------------------------------------------------------------|------------------------------------------------|---------------------------------------------------------------------------------------|
|           |                                     |     |   |   |    | 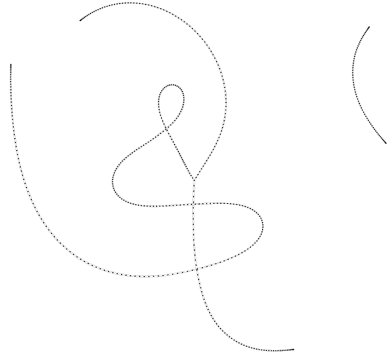   |                                                |     |
| NCTC13534 | <i>Sphingobacterium daejeonense</i> | 39  | 1 | 0 | 0  |    | Finished assembly<br>(lacking circularisation) |    |
| NCTC13543 | <i>Rhizobium radiobacter</i>        | 31  | 0 | 0 | 12 |   | Mis-assembly                                   |   |
| NCTC13552 | <i>Staphylococcus aureus</i>        | 62  | 1 | 0 | 0  |  | Finished circular assembly                     |  |
| NCTC13585 | <i>Neisseria weaveri</i>            | 155 | 1 | 0 | 0  |  | Mis-assembly/Fragmented                        |  |
| NCTC13616 | <i>Staphylococcus aureus</i>        | 250 | 1 | 0 | 0  |  | Finished circular assembly                     |  |
| NCTC13618 | <i>Pseudomonas aeruginosa</i>       | 43  | 1 | 0 | 0  |                                                                                      | Finished assembly<br>(lacking circularisation) |                                                                                       |

|           |                                                      |     |   |   |    |                                                                                      |                                             |                                                                                       |
|-----------|------------------------------------------------------|-----|---|---|----|--------------------------------------------------------------------------------------|---------------------------------------------|---------------------------------------------------------------------------------------|
|           |                                                      |     |   |   |    | 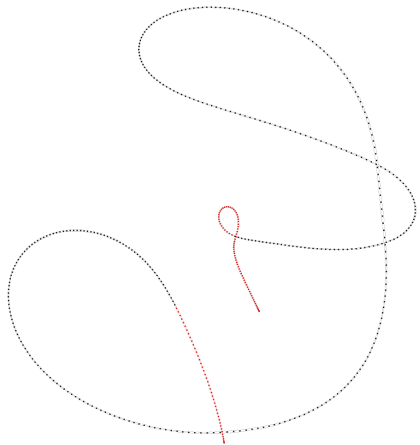    |                                             |     |
| NCTC13619 | <i>Pseudomonas aeruginosa</i>                        | 26  | 0 | 0 | 5  |    | Mis-assembly/Fragmented                     |    |
| NCTC13620 | <i>Pseudomonas aeruginosa</i>                        | 33  | 1 | 0 | 0  |  | Finished assembly (lacking circularisation) |   |
| NCTC13621 | <i>Pseudomonas aeruginosa</i>                        | 23  | 0 | 0 | 31 |  | Mis-assembly/Fragmented                     |  |
| NCTC13626 | <i>Staphylococcus aureus</i>                         | 222 | 1 | 0 | 1  |  | Finished circular assembly                  |  |
| NCTC13628 | <i>Pseudomonas aeruginosa</i>                        | 47  | 0 | 0 | 9  |  | Mis-assembly/Fragmented                     |  |
| NCTC13629 | <i>Yersinia enterocolitica subsp. enterocolitica</i> | 49  | 1 | 0 | 0  |                                                                                      | Finished circular assembly                  |                                                                                       |

|           |                                                                |     |         |         |         |                                                                                      |                            |                                                                                       |
|-----------|----------------------------------------------------------------|-----|---------|---------|---------|--------------------------------------------------------------------------------------|----------------------------|---------------------------------------------------------------------------------------|
|           |                                                                |     |         |         |         | 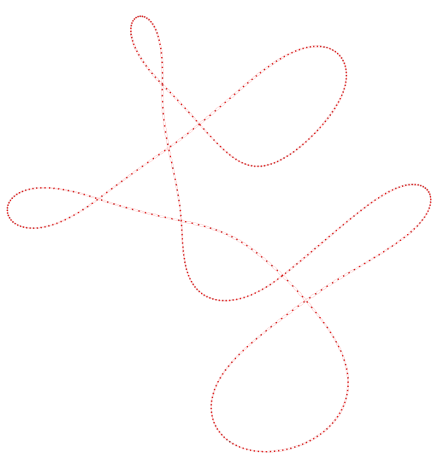    |                            |     |
| NCTC13630 | <i>Citrobacter braakii</i>                                     | 43  | Pending | Pending | Pending |    | Finished circular assembly |    |
| NCTC13634 | <i>Staphylococcus saprophyticus</i> subsp <i>saprophyticus</i> | 105 | 1       | 2       | 1       |   | Finished circular assembly |   |
| NCTC13635 | <i>Klebsiella pneumoniae</i>                                   | 32  | 0       | 0       | 1       |  | Finished circular assembly |  |
| NCTC13639 | <i>Citrobacter freundii</i>                                    | 39  | 1       | 1       | 9       |  | Finished circular assembly |  |
| NCTC13647 | <i>Vibrio vulnificus</i>                                       | 36  | 2       | 0       | 0       |  | Mis-assembly               |  |
| NCTC13667 | <i>Bordetella pertussis</i>                                    | 92  | 0       | 0       | 1       |                                                                                      | Finished circular assembly |                                                                                       |

|           |                             |    |   |   |   |                                                                                    |                         |                                                                                     |
|-----------|-----------------------------|----|---|---|---|------------------------------------------------------------------------------------|-------------------------|-------------------------------------------------------------------------------------|
|           |                             |    |   |   |   | 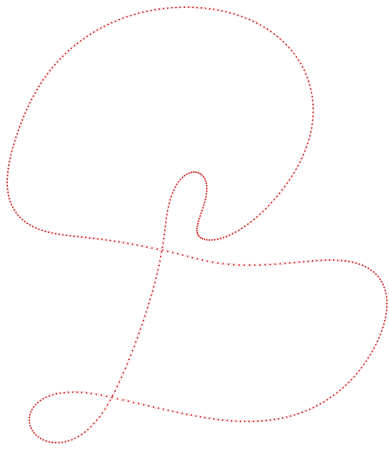  |                         |   |
| NCTC13668 | <i>Bordetella pertussis</i> | 42 | 0 | 0 | 6 |  | Mis-assembly/Fragmented |  |
