# Supplementary material for: HINGE: long-read assembly achieves optimal repeat resolution
Source: Genome Res. 2017 May;27(5):747–56. doi: 10.1101/gr.216465.116 (PMC5411769; doi:10.1101/gr.216465.116)
Supplement: Supplemental Material [file supp_gr.216465.116_Supplemental_Table_S3.xlsx]

## Sheet: Sheet1
NCTC ID	Accession Number
NCTC5055	ERS647570
NCTC10928	ERS627820
NCTC10925	ERS901504
NCTC10924	ERS879574
NCTC13196	ERS846862
NCTC10923	ERS685286
NCTC12218	ERS646604
NCTC12570	ERS617388
NCTC4169	ERS744792
NCTC4168	ERS879586
NCTC8008	ERS747610
NCTC8009	ERS523573
NCTC8007	ERS744796
NCTC8004	ERS806200
NCTC8003	ERS744795
NCTC4163	ERS825155
NCTC6571	ERS798862
NCTC9632	ERS706557
NCTC10672	ERS639455
NCTC10674	ERS764459
NCTC9635	ERS701898
NCTC12180	ERS579201
NCTC12069	ERS849599
NCTC11637	ERS630945
NCTC9997	ERS799804
NCTC12957	ERS901508
NCTC7299	ERS500978
NCTC12950	ERS764958
NCTC12951	ERS647588
NCTC7292	ERS825148
NCTC9145	ERS685293
NCTC7291	ERS812509
NCTC7297	ERS500977
NCTC12958	ERS901503
NCTC7295	ERS500976
NCTC9023	ERS718592
NCTC9022	ERS744801
NCTC9793	ERS904743
NCTC9026	ERS715467
NCTC9024	ERS702126
NCTC9029	ERS743088
NCTC9381	ERS513136
NCTC9546	ERS806207
NCTC11383	ERS950469
NCTC8333	ERS764944
NCTC9750	ERS485849
NCTC13630	ERS538537
NCTC8729	ERS939208
NCTC5798	ERS500970
NCTC11930	ERS904736
NCTC8723	ERS904739
NCTC8721	ERS544012
NCTC8727	ERS939220
NCTC8726	ERS825157
NCTC5793	ERS647572
NCTC8724	ERS811741
NCTC9707	ERS819821
NCTC7175	ERS939203
NCTC10786	ERS513143
NCTC9702	ERS764946
NCTC9703	ERS744790
NCTC9701	ERS744789
NCTC5706	ERS764442
NCTC13476	ERS538533
NCTC10788	ERS636089
NCTC9708	ERS685296
NCTC6134	ERS806215
NCTC12046	ERS879576
NCTC6137	ERS806225
NCTC13095	ERS659595
NCTC12737	ERS462985
NCTC8314	ERS849590
NCTC11854	ERS685288
NCTC12048	ERS879580
NCTC12049	ERS879582
NCTC10855	ERS659576
NCTC13096	ERS659596
NCTC10429	ERS764458
NCTC9098	ERS747600
NCTC9099	ERS812513
NCTC9096	ERS747596
NCTC9097	ERS744786
NCTC9095	ERS744785
NCTC9092	ERS743099
NCTC10588	ERS605480
NCTC13038	ERS473440
NCTC10396	ERS513142
NCTC13032	ERS473439
NCTC12699	ERS646601
NCTC10399	ERS950461
NCTC9419	ERS523590
NCTC9149	ERS702127
NCTC9144	ERS747612
NCTC10090	ERS764457
NCTC9146	ERS799797
NCTC9140	ERS523588
NCTC9142	ERS715468
NCTC9143	ERS743102
NCTC12130	ERS485858
NCTC8546	ERS879570
NCTC12132	ERS462981
NCTC8267	ERS523577
NCTC12035	ERS654926
NCTC4840	ERS500967
NCTC12420	ERS462986
NCTC8261	ERS523576
NCTC13216	ERS530431
NCTC9078	ERS523585
NCTC9637	ERS702138
NCTC13307	ERS445050
NCTC11214	ERS485851
NCTC13353	ERS530434
NCTC13352	ERS538535
NCTC13351	ERS530433
NCTC5046	ERS513127
NCTC10518	ERS846850
NCTC13359	ERS666351
NCTC13438	ERS530437
NCTC9652	ERS736965
NCTC10321	ERS849592
NCTC9086	ERS739089
NCTC9969	ERS764455
NCTC10638	ERS569361
NCTC8167	ERS702124
NCTC9045	ERS743085
NCTC9962	ERS747605
NCTC9963	ERS747606
NCTC9961	ERS747604
NCTC9966	ERS747609
NCTC9967	ERS764454
NCTC9964	ERS747607
NCTC9965	ERS747608
NCTC11676	ERS659583
NCTC12993	ERS473437
NCTC11674	ERS659582
NCTC11675	ERS715403
NCTC7318	ERS500986
NCTC12998	ERS473438
NCTC11678	ERS659584
NCTC11679	ERS670328
NCTC11045	ERS950462
NCTC11044	ERS846855
NCTC11128	ERS715427
NCTC11129	ERS718599
NCTC11043	ERS846854
NCTC11042	ERS654924
NCTC11122	ERS715483
NCTC11123	ERS715484
NCTC11120	ERS736959
NCTC11121	ERS715482
NCTC11126	ERS462976
NCTC11048	ERS921425
NCTC11124	ERS715485
NCTC11125	ERS715486
NCTC9695	ERS636084
NCTC9699	ERS739093
NCTC10973	ERS718596
NCTC8684	ERS636083
NCTC10974	ERS718597
NCTC10975	ERS647562
NCTC5750	ERS764443
NCTC13305	ERS617391
NCTC9668	ERS744788
NCTC8765	ERS807420
NCTC13620	ERS666355
NCTC9661	ERS799802
NCTC6135	ERS811730
NCTC6136	ERS811731
NCTC9662	ERS799803
NCTC6131	ERS806212
NCTC9667	ERS702139
NCTC6133	ERS806214
NCTC13437	ERS666352
NCTC13434	ERS798861
NCTC13435	ERS445051
NCTC7406	ERS500988
NCTC7404	ERS513133
NCTC12924	ERS647587
NCTC418	ERS715397
NCTC13439	ERS530438
NCTC9112	ERS739100
NCTC9111	ERS747593
NCTC9110	ERS739099
NCTC9117	ERS739103
NCTC9116	ERS739102
NCTC10897	ERS956176
NCTC9114	ERS739101
NCTC9021	ERS799808
NCTC4444	ERS513126
NCTC7303	ERS500981
NCTC11343	ERS950467
NCTC11341	ERS736960
NCTC11467	ERS462977
NCTC11466	ERS670330
NCTC8618	ERS921413
NCTC11588	ERS530421
NCTC13175	ERS530430
NCTC11469	ERS473431
NCTC8900	ERS523584
NCTC13647	ERS605486
NCTC10089	ERS836406
NCTC9069	ERS799791
NCTC9068	ERS764449
NCTC9067	ERS718582
NCTC9066	ERS718581
NCTC9065	ERS718590
NCTC7102	ERS500975
NCTC9062	ERS718580
NCTC9060	ERS743091
NCTC8297	ERS513135
NCTC8489	ERS569356
NCTC12171	ERS617397
NCTC6507	ERS807415
NCTC9239	ERS605483
NCTC9070	ERS747592
NCTC12179	ERS579200
NCTC5657	ERS806209
NCTC5743	ERS743094
NCTC10807	ERS451415
NCTC10804	ERS846853
NCTC10805	ERS485850
NCTC12112	ERS630944
NCTC9154	ERS715409
NCTC9071	ERS799792
NCTC9153	ERS686708
NCTC10361	ERS715475
NCTC10360	ERS513141
NCTC10418	ERS523599
NCTC10087	ERS513139
NCTC6267	ERS513131
NCTC9151	ERS701896
NCTC11683	ERS530422
NCTC8839	ERS702125
NCTC9150	ERS715399
NCTC9527	ERS715474
NCTC13046	ERS630949
NCTC9552	ERS950459
NCTC13145	ERS799807
NCTC5658	ERS836414
NCTC12101	ERS654927
NCTC12100	ERS921424
NCTC12103	ERS812511
NCTC8532	ERS445052
NCTC8530	ERS806204
NCTC9868	ERS523593
NCTC13543	ERS636085
NCTC12450	ERS579202
NCTC11080	ERS950458
NCTC11085	ERS939213
NCTC11086	ERS956182
NCTC13384	ERS530435
NCTC12899	ERS970065
NCTC8271	ERS523578
NCTC13276	ERS956193
NCTC3166	ERS836419
NCTC3168	ERS956178
NCTC11104	ERS715476
NCTC11688	ERS659587
NCTC11242	ERS956184
NCTC11169	ERS956183
NCTC12146	ERS659592
NCTC6966	ERS798863
NCTC10538	ERS530411
NCTC10931	ERS627821
NCTC7921	ERS744794
NCTC7922	ERS764943
NCTC10060	ERS659572
NCTC12143	ERS647563
NCTC5713	ERS500968
NCTC7927	ERS715398
NCTC7928	ERS685289
NCTC4199	ERS647568
NCTC10707	ERS904732
NCTC10703	ERS846852
NCTC10702	ERS825169
NCTC10662	ERS554121
NCTC12969	ERS921427
NCTC10664	ERS715412
NCTC12023	ERS836404
NCTC7447	ERS636087
NCTC7446	ERS811738
NCTC12961	ERS462982
NCTC12196	ERS654929
NCTC12194	ERS639454
NCTC12195	ERS654928
NCTC7366	ERS956179
NCTC7364	ERS686705
NCTC10962	ERS718595
NCTC7362	ERS744793
NCTC7360	ERS685291
NCTC7361	ERS807421
NCTC11151	ERS718602
NCTC9016	ERS718589
NCTC7666	ERS807418
NCTC9014	ERS701895
NCTC9015	ERS715466
NCTC9012	ERS718588
NCTC9010	ERS743087
NCTC9011	ERS715465
NCTC9393	ERS825158
NCTC9019	ERS819822
NCTC13668	ERS980033
NCTC13139	ERS798854
NCTC10988	ERS798845
NCTC8725	ERS811742
NCTC13133	ERS654930
NCTC13132	ERS836413
NCTC11429	ERS950472
NCTC11543	ERS715402
NCTC11544	ERS670331
NCTC13136	ERS798851
NCTC13135	ERS798850
NCTC9494	ERS523591
NCTC10016	ERS950464
NCTC9498	ERS702134
NCTC11689	ERS670337
NCTC10796	ERS950466
NCTC10794	ERS639460
NCTC9705	ERS764463
NCTC9656	ERS706559
NCTC9657	ERS812515
NCTC7173	ERS921408
NCTC9309	ERS636088
NCTC13443	ERS538525
NCTC13442	ERS538524
NCTC13441	ERS530440
NCTC13440	ERS530439
NCTC7718	ERS798866
NCTC8300	ERS849589
NCTC8303	ERS939206
NCTC12700	ERS627822
NCTC7712	ERS811739
NCTC7170	ERS921407
NCTC12709	ERS799806
NCTC8883	ERS706550
NCTC9081	ERS739086
NCTC9082	ERS743089
NCTC9085	ERS739088
NCTC9084	ERS739087
NCTC9087	ERS743098
NCTC129	ERS500966
NCTC9089	ERS739091
NCTC9088	ERS739090
NCTC10848	ERS530414
NCTC10849	ERS473430
NCTC10246	ERS799805
NCTC9778	ERS685299
NCTC8017	ERS921410
NCTC9008	ERS743086
NCTC13618	ERS666353
NCTC13619	ERS666354
NCTC7179	ERS939204
NCTC9159	ERS686710
NCTC9158	ERS715410
NCTC9157	ERS799798
NCTC9156	ERS764452
NCTC9155	ERS686709
NCTC10081	ERS513138
NCTC13616	ERS659565
NCTC9152	ERS736962
NCTC5968	ERS849585
NCTC5969	ERS921421
NCTC12419	ERS485860
NCTC12418	ERS701899
NCTC12045	ERS849593
NCTC12413	ERS836411
NCTC8270	ERS544008
NCTC8273	ERS523580
NCTC8272	ERS523579
NCTC12417	ERS485859
NCTC12416	ERS513149
NCTC12415	ERS798848
NCTC13348	ERS450001
NCTC13349	ERS647565
NCTC12047	ERS879578
NCTC12026	ERS530426
NCTC12028	ERS530427
NCTC13347	ERS530432
NCTC10449	ERS921415
NCTC10562	ERS445057
NCTC10442	ERS836417
NCTC10443	ERS846849
NCTC10568	ERS569359
NCTC10444	ERS836407
NCTC10238	ERS970073
NCTC10332	ERS445055
NCTC4174	ERS970064
NCTC13421	ERS617393
NCTC10232	ERS970072
NCTC10237	ERS956181
NCTC11384	ERS950470
NCTC10767	ERS659574
NCTC10766	ERS659575
NCTC12123	ERS485853
NCTC10764	ERS670326
NCTC12241	ERS530429
NCTC7323	ERS500987
NCTC13534	ERS605479
NCTC13533	ERS605482
NCTC13532	ERS605481
NCTC11881	ERS647580
NCTC7242	ERS747598
NCTC12840	ERS901492
NCTC12092	ERS879560
NCTC12091	ERS879558
NCTC12090	ERS849600
NCTC11119	ERS715481
NCTC11118	ERS715426
NCTC11117	ERS715480
NCTC11116	ERS715479
NCTC11115	ERS715478
NCTC11114	ERS715425
NCTC11113	ERS718600
NCTC11112	ERS715424
NCTC11111	ERS715423
NCTC10850	ERS764460
NCTC9684	ERS743108
NCTC8985	ERS736969
NCTC8984	ERS743097
NCTC9601	ERS702135
NCTC5722	ERS500969
NCTC13667	ERS950477
NCTC8450	ERS523581
NCTC9757	ERS950463
NCTC8455	ERS569354
NCTC10757	ERS764947
NCTC9752	ERS825152
NCTC9614	ERS825151
NCTC10758	ERS715413
NCTC13400	ERS473442
NCTC13406	ERS743106
NCTC10086	ERS764462
NCTC9613	ERS825162
NCTC12839	ERS764957
NCTC10864	ERS715414
NCTC9529	ERS701897
NCTC9109	ERS747602
NCTC9091	ERS743090
NCTC11964	ERS846865
NCTC9434	ERS799799
NCTC9127	ERS706552
NCTC9124	ERS950456
NCTC11940	ERS921426
NCTC9123	ERS799794
NCTC9120	ERS799793
NCTC9433	ERS554120
NCTC9128	ERS523587
NCTC9129	ERS747603
NCTC10654	ERS825166
NCTC11470	ERS473432
NCTC11471	ERS473433
NCTC11472	ERS715430
NCTC11473	ERS715431
NCTC11474	ERS718604
NCTC11475	ERS718605
NCTC10286	ERS513140
NCTC11477	ERS950475
NCTC11571	ERS530419
NCTC6759	ERS513132
NCTC11579	ERS530420
NCTC13169	ERS836418
NCTC8622	ERS736968
NCTC7687	ERS807419
NCTC8620	ERS744781
NCTC8621	ERS736967
NCTC9052	ERS764448
NCTC9053	ERS744803
NCTC6198	ERS921423
NCTC13420	ERS617392
NCTC9054	ERS736973
NCTC9055	ERS736974
NCTC10317	ERS718586
NCTC9058	ERS736975
NCTC11358	ERS659580
NCTC5047	ERS736956
NCTC12981	ERS646605
NCTC8895	ERS706551
NCTC8230	ERS956191
NCTC12068	ERS901501
NCTC8232	ERS939219
NCTC12066	ERS849598
NCTC12067	ERS901500
NCTC12064	ERS901506
NCTC12065	ERS901499
NCTC12062	ERS901498
NCTC8332	ERS849591
NCTC9547	ERS811724
NCTC12694	ERS513150
NCTC12696	ERS904738
NCTC13300	ERS798859
NCTC13301	ERS617390
NCTC11939	ERS798843
NCTC11938	ERS513148
NCTC10833	ERS654923
NCTC9035	ERS799790
NCTC6947	ERS500974
NCTC204	ERS836403
NCTC6179	ERS921422
NCTC9413	ERS970070
NCTC12282	ERS462988
NCTC8480	ERS523582
NCTC7023	ERS879590
NCTC6403	ERS956188
NCTC7802	ERS807425
NCTC6407	ERS849586
NCTC11687	ERS659586
NCTC11686	ERS670335
NCTC11685	ERS670336
NCTC11684	ERS670334
NCTC12116	ERS530428
NCTC11682	ERS670329
NCTC11681	ERS670333
NCTC11680	ERS659585
NCTC12880	ERS798849
NCTC5664	ERS806211
NCTC5661	ERS811725
NCTC5660	ERS806210
NCTC5663	ERS811729
NCTC13277	ERS654931
NCTC13373	ERS654933
NCTC11096	ERS639456
NCTC13377	ERS646602
NCTC13376	ERS812512
NCTC10530	ERS825164
NCTC11150	ERS846856
NCTC10537	ERS799809
NCTC10535	ERS569358
NCTC9007	ERS715463
NCTC9414	ERS950457
NCTC11394	ERS639457
NCTC11397	ERS451417
NCTC10903	ERS956171
NCTC8603	ERS744799
NCTC10907	ERS630946
NCTC10904	ERS685285
NCTC12060	ERS849597
NCTC12841	ERS879562
NCTC8796	ERS970069
NCTC8143	ERS450003
NCTC8140	ERS939217
NCTC12233	ERS798847
NCTC10713	ERS921416
NCTC10710	ERS879572
NCTC9944	ERS798844
NCTC10656	ERS825168
NCTC10655	ERS825167
NCTC9828	ERS956180
NCTC10652	ERS825165
NCTC7474	ERS812510
NCTC10650	ERS530412
NCTC12061	ERS901497
NCTC9948	ERS523594
NCTC12971	ERS473436
NCTC7377	ERS921409
NCTC12973	ERS904740
NCTC12874	ERS630948
NCTC9176	ERS702129
NCTC12131	ERS462980
NCTC9171	ERS706556
NCTC11023	ERS715415
NCTC11022	ERS718598
NCTC13635	ERS538538
NCTC235	ERS513125
NCTC86	ERS744791
NCTC9369	ERS806206
NCTC11434	ERS513145
NCTC11435	ERS950474
NCTC11436	ERS685287
NCTC11437	ERS617387
NCTC13128	ERS819819
NCTC10999	ERS939212
NCTC11432	ERS950473
NCTC9075	ERS747599
NCTC13125	ERS736961
NCTC6385	ERS647574
NCTC13127	ERS736966
NCTC11531	ERS950476
NCTC11532	ERS956173
NCTC5773	ERS513129
NCTC10006	ERS462975
NCTC10004	ERS659571
NCTC10005	ERS513137
NCTC6017	ERS500971
NCTC4137	ERS811728
NCTC11476	ERS715432
NCTC7151	ERS811734
NCTC4133	ERS812508
NCTC7152	ERS685290
NCTC13450	ERS538526
NCTC13451	ERS538527
NCTC13452	ERS538528
NCTC9646	ERS659570
NCTC9645	ERS706558
NCTC9644	ERS799801
NCTC9073	ERS736978
NCTC9504	ERS523592
NCTC12650	ERS764952
NCTC12653	ERS764954
NCTC12652	ERS764953
NCTC12655	ERS764956
NCTC12654	ERS764955
NCTC11872	ERS639459
NCTC10872	ERS921418
NCTC12421	ERS836421
NCTC11320	ERS846857
NCTC3438	ERS569353
NCTC5338	ERS921420
NCTC9079	ERS718591
NCTC1936	ERS736957
NCTC11327	ERS846864
NCTC11440	ERS647586
NCTC8846	ERS739104
NCTC8960	ERS799789
NCTC8849	ERS706549
NCTC9009	ERS715464
NCTC9163	ERS747611
NCTC7791	ERS807422
NCTC9161	ERS686711
NCTC9166	ERS702128
NCTC9167	ERS715469
NCTC9164	ERS744787
NCTC13628	ERS666357
NCTC9001	ERS451419
NCTC13626	ERS659566
NCTC9003	ERS736971
NCTC9002	ERS764942
NCTC9005	ERS747590
NCTC9004	ERS736972
NCTC13621	ERS666356
NCTC9006	ERS718587
NCTC10002	ERS764456
NCTC12158	ERS659593
NCTC12156	ERS617389
NCTC12157	ERS462989
NCTC12152	ERS462983
NCTC12151	ERS462984
NCTC9188	ERS715473
NCTC9189	ERS764453
NCTC10517	ERS836408
NCTC11802	ERS485852
NCTC12012	ERS605485
NCTC6482	ERS743095
NCTC9180	ERS702130
NCTC9181	ERS685295
NCTC9182	ERS718584
NCTC9183	ERS702131
NCTC9184	ERS736963
NCTC9185	ERS702132
NCTC9186	ERS702133
NCTC9187	ERS747614
NCTC7988	ERS806190
NCTC11192	ERS579195
NCTC5386	ERS849584
NCTC9049	ERS764447
NCTC5385	ERS901510
NCTC9048	ERS764446
NCTC10345	ERS819824
NCTC10344	ERS825153
NCTC12495	ERS956192
NCTC10221	ERS647578
NCTC8766	ERS806205
NCTC12278	ERS879592
NCTC92	ERS743109
NCTC7982	ERS939205
NCTC7972	ERS806188
NCTC12479	ERS956186
NCTC8105	ERS513134
NCTC12050	ERS879584
NCTC2669	ERS812507
NCTC8100	ERS939215
NCTC10618	ERS627819
NCTC7878	ERS806186
NCTC8317	ERS544010
NCTC5655	ERS806208
NCTC5656	ERS825156
NCTC8294	ERS806202
NCTC11063	ERS904733
NCTC12054	ERS849595
NCTC11067	ERS605484
NCTC2218	ERS846867
NCTC11064	ERS904741
NCTC11100	ERS715416
NCTC11101	ERS715417
NCTC11102	ERS715418
NCTC11103	ERS715419
NCTC8198	ERS445054
NCTC11105	ERS530418
NCTC11106	ERS715477
NCTC11107	ERS715420
NCTC11108	ERS715421
NCTC8195	ERS939218
NCTC8196	ERS744798
NCTC9551	ERS825159
NCTC8193	ERS647583
NCTC10958	ERS764949
NCTC10959	ERS764950
NCTC12058	ERS901496
NCTC10657	ERS846851
NCTC10957	ERS764948
NCTC8749	ERS647585
NCTC10047	ERS523595
NCTC8746	ERS970068
NCTC8741	ERS950455
NCTC8740	ERS939211
NCTC8743	ERS970067
NCTC8742	ERS970066
NCTC4671	ERS846869
NCTC7428	ERS811736
NCTC4673	ERS846871
NCTC4672	ERS846870
NCTC4675	ERS879588
NCTC74	ERS473429
NCTC8159	ERS451418
NCTC9606	ERS647566
NCTC4669	ERS846868
NCTC9603	ERS970071
NCTC5717	ERS647579
NCTC7427	ERS747594
NCTC10768	ERS530413
NCTC3046	ERS743092
NCTC7349	ERS659569
NCTC8547	ERS921412
NCTC9616	ERS702136
NCTC3761	ERS811727
NCTC9030	ERS718578
NCTC9031	ERS744783
NCTC9032	ERS744802
NCTC9033	ERS764444
NCTC9034	ERS747595
NCTC7926	ERS685292
NCTC9038	ERS764445
NCTC10487	ERS670325
NCTC12007	ERS579199
NCTC5371	ERS956187
NCTC5370	ERS849583
NCTC10705	ERS685301
NCTC11366	ERS956172
NCTC11360	ERS956185
NCTC13405	ERS530436
NCTC11979	ERS579198
NCTC11407	ERS950471
NCTC7022	ERS849587
NCTC11978	ERS579197
NCTC8738	ERS950454
NCTC5934	ERS659568
NCTC11561	ERS825171
NCTC11567	ERS904734
NCTC8731	ERS939209
NCTC8732	ERS921414
NCTC2366	ERS956177
NCTC8734	ERS939210
NCTC8736	ERS950453
NCTC7164	ERS849588
NCTC9044	ERS747591
NCTC9047	ERS904726
NCTC7692	ERS825149
NCTC9040	ERS812514
NCTC9043	ERS744784
NCTC13461	ERS743107
NCTC13463	ERS538530
NCTC13462	ERS538529
NCTC13465	ERS538532
NCTC7169	ERS939202
NCTC12052	ERS901494
NCTC12051	ERS849594
NCTC11976	ERS579196
NCTC12057	ERS901495
NCTC4450	ERS846863
NCTC8328	ERS879568
NCTC9553	ERS836415
NCTC8326	ERS921411
NCTC12059	ERS849596
NCTC8324	ERS939207
NCTC9556	ERS950460
NCTC9555	ERS825160
NCTC10382	ERS569357
NCTC11925	ERS743105
NCTC10430	ERS715411
NCTC3750	ERS811726
NCTC10384	ERS451416
NCTC6933	ERS647569
NCTC9617	ERS702137
NCTC6245	ERS500972
NCTC9139	ERS686707
NCTC11607	ERS639458
NCTC10262	ERS702140
NCTC10263	ERS718585
NCTC10261	ERS685300
NCTC9130	ERS706553
NCTC9133	ERS706555
NCTC9132	ERS706554
NCTC9135	ERS799795
NCTC7445	ERS811737
NCTC9137	ERS764450
NCTC9136	ERS799796
NCTC11698	ERS715404
NCTC8496	ERS523583
NCTC7836	ERS523572
NCTC7856	ERS798867
NCTC11691	ERS659588
NCTC11692	ERS659589
NCTC11693	ERS659590
NCTC11694	ERS530423
NCTC11695	ERS530424
NCTC11696	ERS530425
NCTC11697	ERS659591
NCTC12127	ERS715405
NCTC12126	ERS462979
NCTC12125	ERS485855
NCTC8399	ERS811740
NCTC12232	ERS846858
NCTC12965	ERS473435
NCTC12120	ERS462978
NCTC7887	ERS806187
NCTC8258	ERS523575
NCTC13464	ERS538531
NCTC12129	ERS485857
NCTC12128	ERS485856
NCTC13360	ERS654932
NCTC10884	ERS743103
NCTC9138	ERS764451
NCTC5056	ERS739096
NCTC9611	ERS950452
NCTC13368	ERS739105
NCTC9121	ERS739092
NCTC5052	ERS739094
NCTC5053	ERS836405
NCTC5050	ERS513128
NCTC5051	ERS812516
NCTC11076	ERS647577
NCTC11388	ERS636086
NCTC10313	ERS523597
NCTC11228	ERS736955
NCTC10314	ERS523598
NCTC9162	ERS685294
NCTC6086	ERS647573
NCTC9612	ERS825161
NCTC8781	ERS744800
NCTC8783	ERS812518
NCTC4725	ERS846872
NCTC9660	ERS706560
NCTC10723	ERS956170
NCTC10722	ERS647564
NCTC12224	ERS901502
NCTC12225	ERS798846
NCTC8178	ERS807423
NCTC10724	ERS825170
NCTC8172	ERS686706
NCTC7465	ERS445053
NCTC11667	ERS670332
NCTC12982	ERS538534
NCTC7308	ERS500985
NCTC12986	ERS670338
NCTC7304	ERS500982
NCTC7306	ERS500983
NCTC7307	ERS500984
NCTC7300	ERS500979
NCTC7302	ERS500980
NCTC9134	ERS743101
NCTC11030	ERS956174
NCTC13297	ERS798856
NCTC4001	ERS901509
NCTC11131	ERS715428
NCTC11130	ERS718601
NCTC11132	ERS715429
NCTC11134	ERS450000
NCTC13298	ERS798857
NCTC13299	ERS798858
NCTC13098	ERS715407
NCTC7832	ERS523571
NCTC7526	ERS811723
NCTC7486	ERS798865
NCTC7485	ERS807416
NCTC13097	ERS715406
NCTC10961	ERS718594
NCTC10960	ERS764951
NCTC7831	ERS523570
NCTC10965	ERS670327
NCTC12854	ERS901493
NCTC4136	ERS825154
NCTC7990	ERS825150
NCTC10035	ERS836416
NCTC11109	ERS715422
NCTC5742	ERS647567
NCTC8705	ERS743096
NCTC6024	ERS513130
NCTC5741	ERS743093
NCTC9777	ERS736964
NCTC9776	ERS685298
NCTC9775	ERS685297
NCTC8468	ERS647581
NCTC10038	ERS956175
NCTC13424	ERS617395
NCTC8179	ERS744797
NCTC11046	ERS811721
NCTC7414	ERS811732
NCTC7415	ERS811733
NCTC13422	ERS617394
NCTC9855	ERS736958
NCTC11468	ERS523600
NCTC13585	ERS627823
NCTC9100	ERS747597
NCTC9101	ERS743100
NCTC9102	ERS739097
NCTC9103	ERS747613
NCTC9104	ERS523586
NCTC13629	ERS538536
NCTC9107	ERS747601
NCTC9108	ERS819820
NCTC10865	ERS718593
NCTC10866	ERS921417
NCTC11965	ERS836410
NCTC11962	ERS846861
NCTC11963	ERS836409
NCTC10863	ERS764461
NCTC13483	ERS904746
NCTC11359	ERS659581
NCTC7540	ERS807417
NCTC7121	ERS798864
NCTC11355	ERS659577
NCTC11357	ERS659579
NCTC11356	ERS659578
NCTC11351	ERS445056
NCTC7799	ERS744780
NCTC11352	ERS950468
NCTC13148	ERS764959
NCTC9169	ERS715470
NCTC11606	ERS904735
NCTC13142	ERS798841
NCTC13143	ERS846860
NCTC13140	ERS798855
NCTC13141	ERS846859
NCTC11127	ERS715487
NCTC9175	ERS715400
NCTC6754	ERS647571
NCTC9177	ERS523589
NCTC12124	ERS485854
NCTC13634	ERS659567
NCTC9170	ERS715471
NCTC11075	ERS647576
NCTC13639	ERS538539
NCTC9076	ERS729255
NCTC9077	ERS739085
NCTC9179	ERS715472
NCTC9178	ERS715401
NCTC8256	ERS523574
NCTC11077	ERS530417
NCTC12167	ERS901507
NCTC12168	ERS617396
NCTC6513	ERS819823
NCTC8623	ERS744782
NCTC11189	ERS901505
NCTC10810	ERS513144
NCTC13131	ERS836412
NCTC11186	ERS718603
NCTC10460	ERS904744
NCTC8231	ERS879566
NCTC7411	ERS500989
NCTC6802	ERS647575
NCTC13137	ERS798852
NCTC9050	ERS718579
NCTC10353	ERS904731
NCTC10350	ERS825163
NCTC10217	ERS544009
NCTC10213	ERS659573
NCTC10212	ERS950465
NCTC10211	ERS523596
NCTC7869	ERS956190
NCTC7868	ERS956189
NCTC7944	ERS807426
NCTC8133	ERS939216
NCTC12217	ERS646603
NCTC8188	ERS879564
NCTC7865	ERS901511
NCTC12261	ERS904737
NCTC8500	ERS764945
NCTC8507	ERS807424
NCTC12463	ERS659594
NCTC10609	ERS715408
NCTC13552	ERS798842
NCTC11801	ERS513147
NCTC13251	ERS630947
NCTC13138	ERS798853
NCTC11079	ERS921419
NCTC11800	ERS513146
NCTC11074	ERS743104
NCTC1080	ERS846866
NCTC5164	ERS849582
NCTC9495	ERS799800
NCTC5163	ERS846873
NCTC13395	ERS811722
NCTC13394	ERS798860
NCTC11047	ERS654925
NCTC5057	ERS812517
NCTC8184	ERS836420
NCTC5054	ERS739095
NCTC9174	ERS718583
